# Supplementary material for: CRISPR/Cas9-mediated gene knockin in the hydroid Hydractinia symbiolongicarpus
Source: PubMed Central journal article supplement (PMC6122657; doi:10.1186/s12864-018-5032-z), 2018-09-03
Supplement: 12864_2018_5032_MOESM1_ESM.pdf [file 12864_2018_5032_MOESM1_ESM.pdf]

## SUPPLEMENTARY INFORMATION

### **CRISPR/Cas9-mediated gene knockin in the hydroid *Hydractinia symbiolongicarpus***

Steven M. Sanders<sup>1,2</sup>, Zhiwei Ma<sup>1,2</sup>, Julia M. Hughes<sup>1,2</sup>, Brooke M. Riscoe<sup>1,2</sup>, Gregory A. Gibson<sup>3</sup>, Alan M. Watson<sup>3</sup>, Hakima Flici<sup>4</sup>, Uri Frank<sup>4</sup>, Christine E. Schnitzler<sup>5</sup>, Andreas D. Baxevanis<sup>6</sup>, and Matthew L. Nicotra<sup>1,2,7\*</sup>

<sup>1</sup> Thomas E. Starzl Transplantation Institute, Department of Surgery, University of Pittsburgh, Pittsburgh, PA, USA

<sup>2</sup> Pittsburgh Center for Evolutionary Biology and Medicine, University of Pittsburgh, Pittsburgh, PA, USA

<sup>3</sup> Center for Biological Imaging and Department of Cell Biology, University of Pittsburgh, Pittsburgh, PA, USA

<sup>4</sup> Centre for Chromosome Biology, School of Natural Sciences, National University of Ireland, Galway, Ireland

<sup>5</sup> Whitney Laboratory for Marine Bioscience, and Department of Biology, University of Florida, St. Augustine, FL, USA

<sup>6</sup> Computational and Statistical Genomics Branch, National Human Genome Research Institute, National Institutes of Health, Bethesda, MD, USA

<sup>7</sup> Department of Immunology, University of Pittsburgh, Pittsburgh, PA, USA

\* Corresponding author

Email: [matthew.nicotra@pitt.edu](mailto:matthew.nicotra@pitt.edu) (MLN)

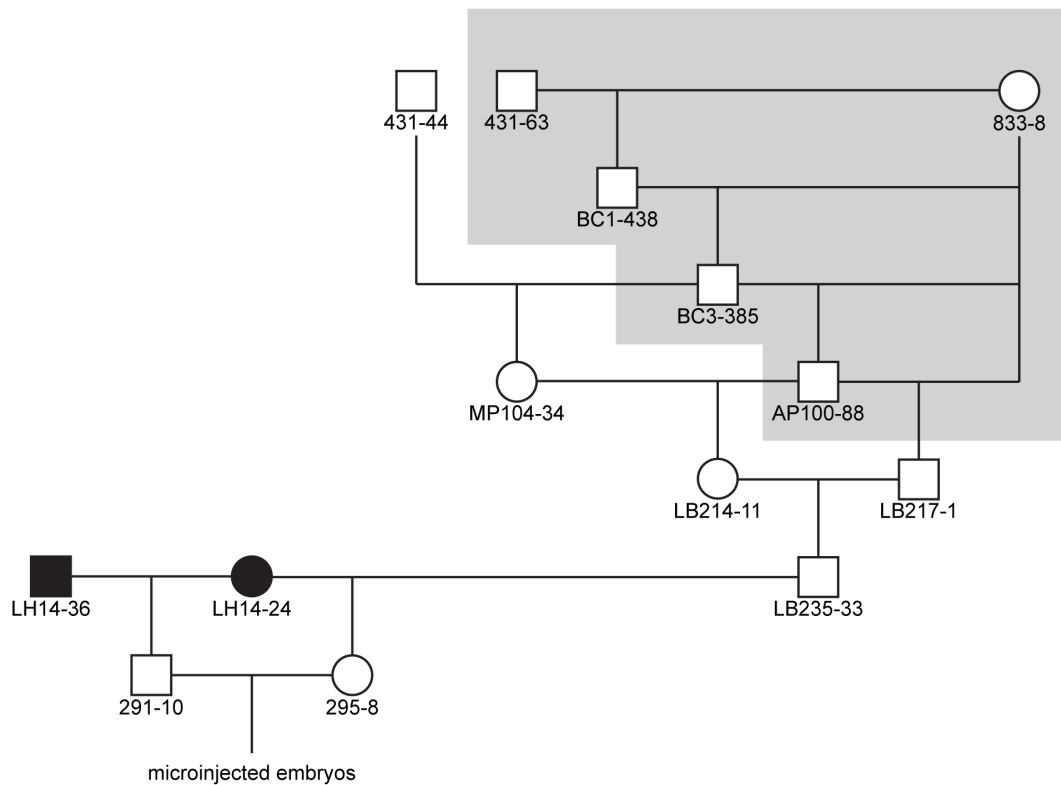

**Figure S1. Pedigree of the colonies used to generate zygotes for microinjection.**

Field-collected colonies are denoted with black symbols. Colony 291-10 is the offspring of two colonies collected from Lighthouse Point, New Haven, CT in 2014. Colony 295-8 is the offspring of a field collected colony and a laboratory strain, 235-33. The pedigree of colony 235-33 can be recreated by concatenating previously published pedigrees (shaded area) (Powell *et al.* 2007; Cadavid *et al.* 2004). Colony AP100-88 is from the mapping population in Powell *et al.* 2007. Colony 431-44 is from the mapping population in Cadavid *et al.* 2004.

Cadavid LF, Powell AE, Nicotra ML, Moreno M, Buss LW. An invertebrate histocompatibility complex. *Genetics*. 2004;167:357–65.

Powell AE, Nicotra ML, Moreno MA, Lakkis FG, Dellaporta SL, Buss LW. Differential effect of allorecognition loci on phenotype in *Hydractinia symbiolongicarpus* (Cnidaria: Hydrozoa). *Genetics*. 2007;177:2101–7.

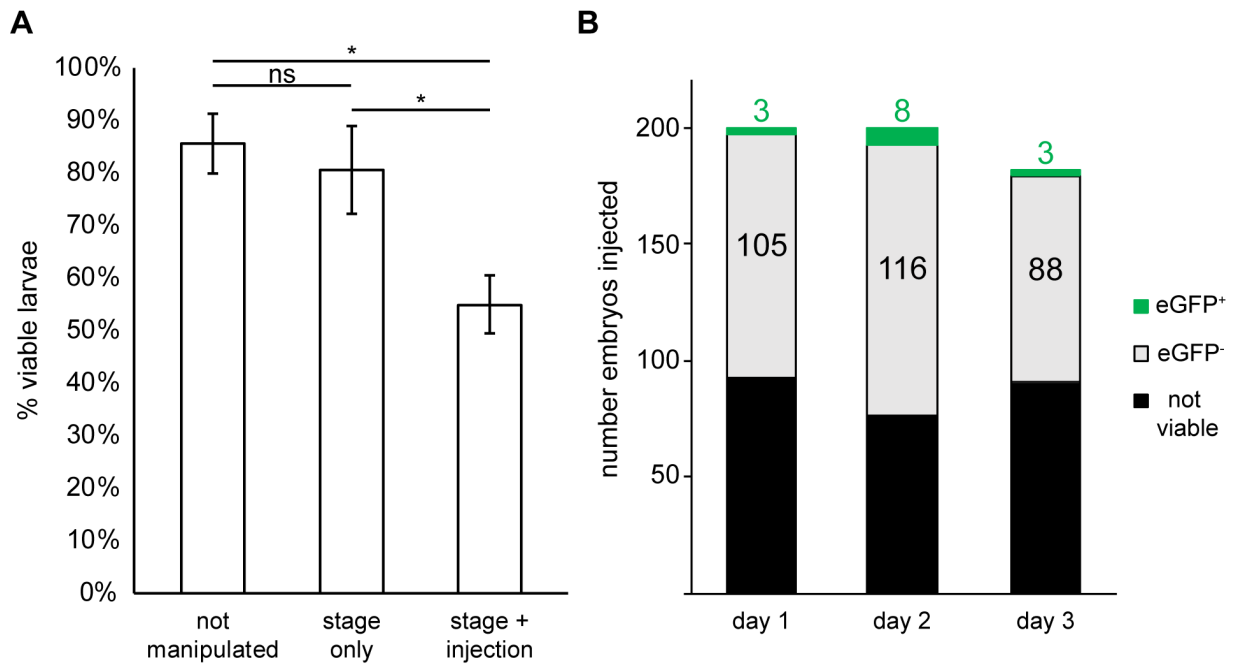

**Figure S2. Effects and outcomes of microinjection.**

(A) Fertilized embryos were collected and either left in a dish (not manipulated), placed on the microscope stage during microinjections, but not injected (stage only), or injected with the microinjection cocktail (stage + injection). Embryos were assessed at 48 hpf for viability. N = 3 independent experiments. \* =  $p < 0.01$  by Student's t-test. ns = not significant. (B) Raw data from three days of microinjections. Numbers of viable eGFP positive and negative larvae are indicated on or above the bar graph.

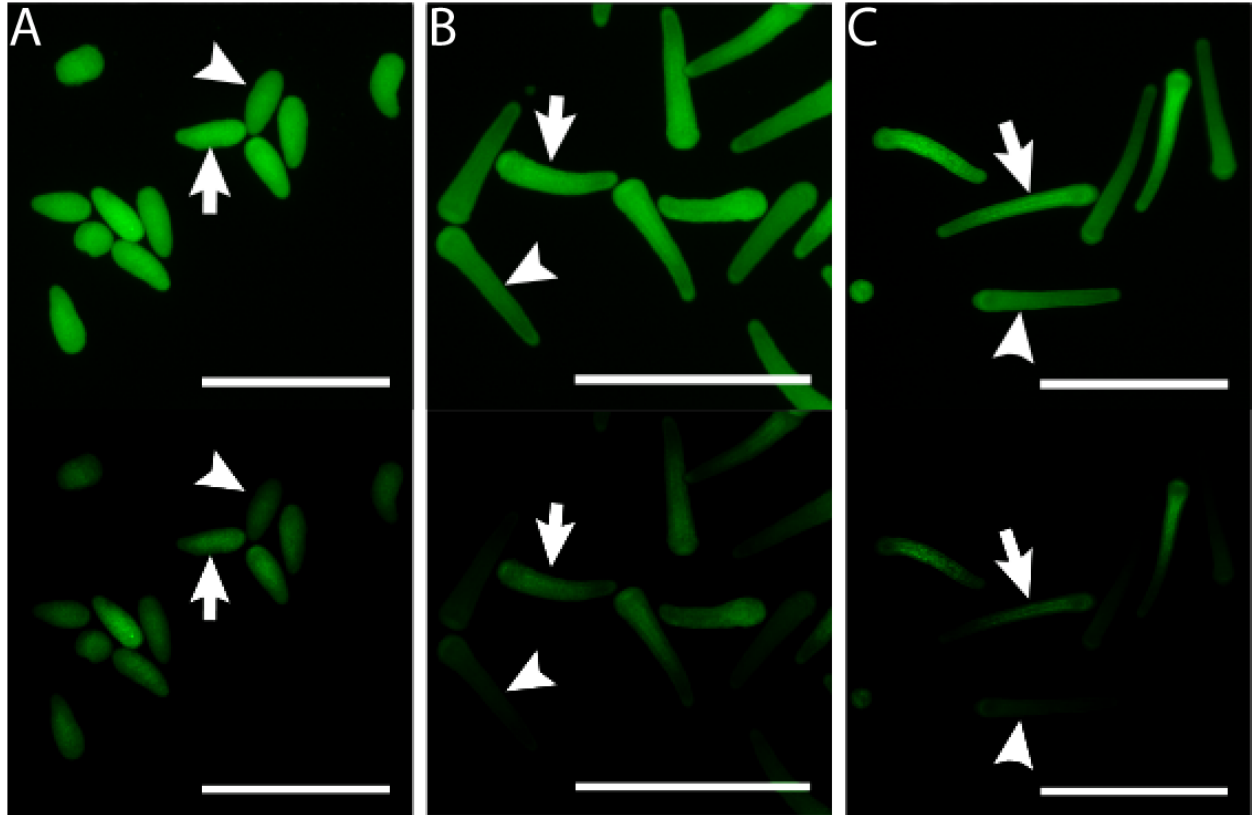

**Figure S3. eGFP<sup>+</sup> vs. eGFP<sup>dim</sup> larvae.**

Figure 2D-F images with gamma correction to increase the contrast between eGFP<sup>+</sup> and eGFP<sup>dim</sup> larvae. Original image on top row and gamma corrected version on bottom. (A) 24 hpf embryos from the backcross of 347-10 to 291-10, beginning to show slightly dimmer eGFP signal in some larvae (arrowhead) compared to others (arrow). (B) 72 hpf embryos from the same cross. eGFP<sup>+</sup> (arrow) and eGFP<sup>dim</sup> (arrowhead) larvae are now evident. (C) 168 hr-old embryos. The distinction between eGFP<sup>+</sup> (arrow) and eGFP<sup>dim</sup> (arrowhead) larvae is even more substantial. All scale bars = 1 mm.

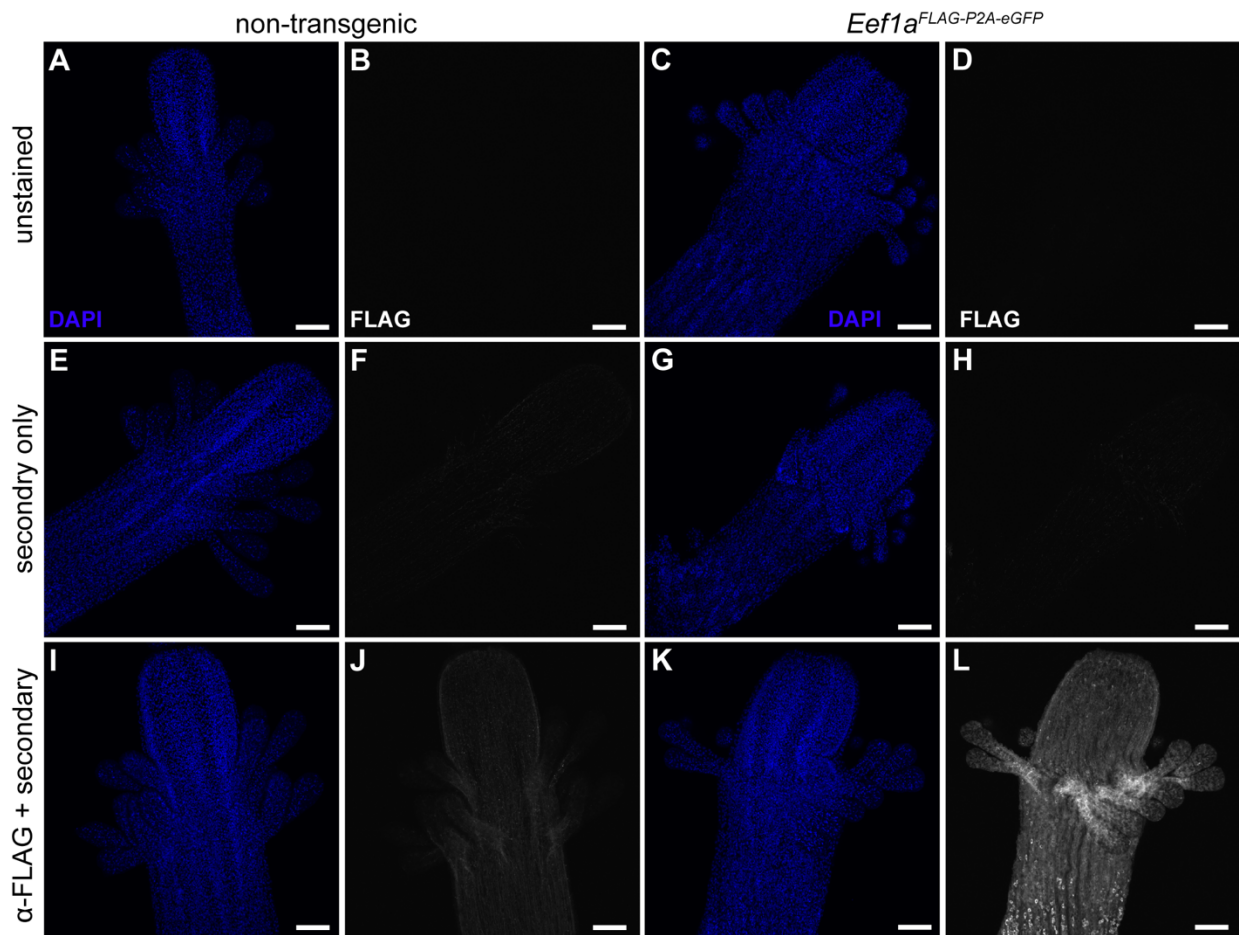

**Figure S4. FLAG immunolocalization controls**

Gastrozooids were fixed, permeabilized, stained with the indicated combination of antibodies, and counterstained with DAPI. (A-D) Gastrozooids from nontransgenic or transgenic gastrozooids stained with neither primary nor secondary antibody. (E-H) Gastrozooids stained only with the Alexa 647 conjugated goat anti-mouse secondary antibody. (I-L) Gastrozooids stained with mouse anti-FLAG primary antibody followed by Alexa 647 goat anti-mouse secondary. No background signal was detected on the Alexa 647 channel in unstained non-transgenic or transgenic polyps (B,D). Very faint background signal was detected from Alexa 647 in the secondary-only control, although this was equivalent between non-transgenic and transgenic gastrozooids (F and H, respectively). Increased background was detected in the non-transgenic gastrozooids stained with primary and secondary antibodies (J), but this was lower than that observed in transgenic polyps (L). Scale bars = 100  $\mu$ m in all panels.

**Table S1. Oligonucleotide sequences used in this study.**

| <b>Oligo ID</b> | <b>Sequence (5'→3')</b>  | <b>Comment</b> |
|-----------------|--------------------------|----------------|
| sgRNA 847       | CATAGGTCACTTCTTTTTTC     | Figure 1       |
| Pr845           | GTAGAAACTGGTGTATTGTCCCCT | Figure 3 & 7   |
| Pr875           | TTTTCGTTGGGATCTTTCGAAAGG | Figure 3       |
| Pr876           | CCAGGTCCAATGAGTAAAGGAGAA | Figure 3       |
| Pr877           | CAATAATAAACGCAACATCGCTGC | Figure 3 & 7   |
| Pr846           | ACTTCACATTTGGTTTACGCTACG | Figure 7       |
| Pr899           | TTGATGCCTCCCAACCCATC     | Figure 7       |
| Pr900           | CCTGTCCAGTTACCAGGCTAC    | Figure 7       |
| Pr901           | GCGAATGGAGGGCTCAATGA     | Figure 7       |
| Pr996           | AGGAACACAAACAGCCAAATTGAA | Figure 7       |
| Pr998           | AATGACACACTCGCTGACGT     | Figure 7       |
| Pr1000          | TTGAAGGGGAGGGTGAAGGA     | Figure 7       |
| Pr1045          | GATCAGAAGGCCGTCATCATTG   | Figure 7       |
| Pr1046          | ATATGTCAGGATTTTGCCCATG   | Figure 7       |
| Pr1047          | AGGCCGTCATCATTGTCTTG     | Figure 7       |
| Pr1048          | AGGGATAAAGCTAAAAGTGCCCA  | Figure 7       |
