# Supplementary material for: CRISPR/Cas9-mediated gene knockin in the hydroid Hydractinia symbiolongicarpus
Source: PubMed Central journal article supplement (PMC6122657; doi:10.1186/s12864-018-5032-z), 2018-09-03
Supplement: 12864_2018_5032_MOESM2_ESM.pdf [file 12864_2018_5032_MOESM2_ESM.pdf]

Eef1a\_gDNA\_295-8\_2.4kb\_allele\_clone2 **GTAGAAACTGGTGTATTGTCCCCTGGTATGATCGTTACATTTGCCCTGCCAATGTAACC** 60  
 Eef1a\_gDNA\_295-8\_2.4kb\_allele\_clone1 GTAGAAACTGGTGTATTGTCCCCTGGTATGATCGTTACATTTGCCCTGCCAATGTAACC 60  
 EF1a\_gDNA\_295-8\_2.4kb\_allele\_clone3 GTAGAAACTGGTGTATTGTCCCCTGGTATGATCGTTACATTTGCCCTGCCAATGTAACC 60  
 EF1a\_gDNA\_295-8\_2kb\_allele\_clone2 GTAGAAACTGGTGTATTGTCCCCTGGTATGATCGTTACATTTGCCCTGCCAATGTAACC 60  
 EF1a\_gDNA\_295-8\_2kb\_allele\_clone3 GTAGAAACTGGTGTATTGTCCCCTGGTATGATCGTTACATTTGCCCTGCCAATGTAACC 60  
 Eef1a\_gDNA\_295-8\_2kb\_allele\_clone5 **GC**AGAAACTGGTGTATTGTCCCCTGGTATGATCGTTACATTTGCCCTGCCAATGTAACC 60

Eef1a\_gDNA\_295-8\_2.4kb\_allele\_clone2 **ACTGAGGTCAAATCTGTAGAAATGCACCACGAATCCTTAACTGAAGCACATCCAGGTGAT** 120  
 Eef1a\_gDNA\_295-8\_2.4kb\_allele\_clone1 ACTGAGGTCAAATCTGTAGAAATGCACCACGAATCCTTAACTGAAGCACATCCAGGTGAT 120  
 EF1a\_gDNA\_295-8\_2.4kb\_allele\_clone3 ACTGAGGTCAAATCTGTAGAAATGCACCACGAATCCTTAACTGAAGCACATCCAGGTGAT 120  
 EF1a\_gDNA\_295-8\_2kb\_allele\_clone2 ACTGAGGTCAAATCTGTAGAAATGCACCACGAATCCTTAACTGAAGCACATCCAGGTGAT 120  
 EF1a\_gDNA\_295-8\_2kb\_allele\_clone3 ACTGAGGTCAAATCTGTAGAAATGCACCACGAATCCTTAACTGAAGCACATCCAGGTGAT 120  
 Eef1a\_gDNA\_295-8\_2kb\_allele\_clone5 ACTGAGGTCAAATCTGTAGAAATGCACCACGAATCCTTAACTGAAGCACATCCAGGTGAT 120

Eef1a\_gDNA\_295-8\_2.4kb\_allele\_clone2 **AATGTTGGTTTTAATGTCAAAAATGTGTCTATCAAGGATATCAAACGTGGTATGGTTGCG** 180  
 Eef1a\_gDNA\_295-8\_2.4kb\_allele\_clone1 AATGTTGGTTTTAATGTCAAAAATGTGTCTATCAAGGATATCAAACGTGGTATGGTTGCG 180  
 EF1a\_gDNA\_295-8\_2.4kb\_allele\_clone3 AATGTTGGTTTTAATGTCAAAAATGTGTCTATCAAGGATATCAAACGTGGTATGGTTGCG 180  
 EF1a\_gDNA\_295-8\_2kb\_allele\_clone2 AATGTTGGTTTTAATGTCAAAAATGTGTCTATCAAGGATATCAAACGTGGTATGGTTGCG 180  
 EF1a\_gDNA\_295-8\_2kb\_allele\_clone3 AATGTTGGTTTTAATGTCAAAAATGTGTCTATCAAGGATATCAAACGTGGTATGGTTGCG 180  
 Eef1a\_gDNA\_295-8\_2kb\_allele\_clone5 AATGTTGGTTTTAATGTCAAAAATGTGTCTATCAAGGATATCAAACGTGGTATGGTTGCG 180

Eef1a\_gDNA\_295-8\_2.4kb\_allele\_clone2 **TCTGACAGCAAAAATGATCCAGCCAAAGAAGCCAAAACCTTTTATGCACAGGTATTCCTTT** 240  
 Eef1a\_gDNA\_295-8\_2.4kb\_allele\_clone1 TCTGACAGCAAAAATGATCCAGCCAAAGAAGCCAAAACCTTTTATGCACAGGTATTCCTTT 240  
 EF1a\_gDNA\_295-8\_2.4kb\_allele\_clone3 TCTGACAGCAAAAATGATCCAGCCAAAGAAGCCAAAACCTTTTATGCACAGGTATTCCTTT 240  
 EF1a\_gDNA\_295-8\_2kb\_allele\_clone2 TCTGACAGCAAAAATGATCCAGCCAAAGAAGCCAAAACCTTTTATGCACAGGTATTCCTTT 240  
 EF1a\_gDNA\_295-8\_2kb\_allele\_clone3 TCTGACAGCAAAAATGATCCAGCCAAAGAAGCCAAAACCTTTTATGCACAGGTATTCCTTT 240  
 Eef1a\_gDNA\_295-8\_2kb\_allele\_clone5 TCTGACAGCAAAAATGATCCAGCCAAAGAAGCCAAAACCTTTTATGCACAGGTATTCCTTT 240

Eef1a\_gDNA\_295-8\_2.4kb\_allele\_clone2 **AATTTTTGTA**CTTAACTTATCAGTTTGTATAAGCGTGTGGCCGTGGCTTGCCACTTGCT 300  
 Eef1a\_gDNA\_295-8\_2.4kb\_allele\_clone1 AATTTTTGTACTTAACTTATCAGTTTGTATAAGCGTGTGGCCGTGGCTTGCCACTTGCT 300  
 EF1a\_gDNA\_295-8\_2.4kb\_allele\_clone3 AATTTTTGTACTTAACTTATCAGTTTGTATAAGCGTGTGGCCGTGGCTTGCCACTTGCT 300  
 EF1a\_gDNA\_295-8\_2kb\_allele\_clone2 AATTTTTGTACTTAACTTATCAGTTTGTATAAGCGTGTGGCCGTGGCTTGCCACTTGCT 300  
 EF1a\_gDNA\_295-8\_2kb\_allele\_clone3 AATTTTTGTACTTAACTTATCAGTTTGTATAAGCGTGTGGCCGTGGCTTGCCACTTGCT 300  
 Eef1a\_gDNA\_295-8\_2kb\_allele\_clone5 AATTTTTGTACTTAACTTATCAGTTTGTATAAGCGTGTGGCCGTGGCTTGCCACTTGCT 300

Eef1a\_gDNA\_295-8\_2.4kb\_allele\_clone2 **TAGCATGATAAATCAATCAACTTGACATTCCATCAATTTTGTTC AACAGAAACAGGACCT** 360  
 Eef1a\_gDNA\_295-8\_2.4kb\_allele\_clone1 TAGCATGATAAATCAATCAACTTGACATTCCATCAATTTTGTTC AACAGAAACAGGACCT 360  
 EF1a\_gDNA\_295-8\_2.4kb\_allele\_clone3 TAGCATGATAAATCAATCAACTTGACATTCCATCAATTTTGTTC AACAGAAACAGGACCT 360  
 EF1a\_gDNA\_295-8\_2kb\_allele\_clone2 TAGCATGATAAATCAATCAACTTGACATTCCATCAATTTTGTTC AACAGAAACAGGACCT 360  
 EF1a\_gDNA\_295-8\_2kb\_allele\_clone3 TAGCATGATAAATCAATCAACTTGACATTCCATCAATTTTGTTC AACAGAA**AGC**AGGACCT 360  
 Eef1a\_gDNA\_295-8\_2kb\_allele\_clone5 TAGCATGATAAATCAATCAACTTGACATTCCATCAATTTTGTTC AACAGAAACAGGACCT 360

Eef1a\_gDNA\_295-8\_2.4kb\_allele\_clone2 **TTAAATAGCAAAACAAAATATTGAAATAAAACTGTATGATTTTGTCACTATCGTTTATGTG** 420  
 Eef1a\_gDNA\_295-8\_2.4kb\_allele\_clone1 TTAAATAGCAAAACAAAATATTGAAATAAAACTGTATGATTTTGTCACTATCGTTTATGTG 420  
 EF1a\_gDNA\_295-8\_2.4kb\_allele\_clone3 TTAAATAGCAAAACAAAATATTGAAATAAAACTGTATGATTTTGTCACTATCGTTTATGTG 420  
 EF1a\_gDNA\_295-8\_2kb\_allele\_clone2 TTAAATAGCAAAACAAAATATTGAAATAAAACTGTATGATTTTGTCACTATCGTTTATGTG 420  
 EF1a\_gDNA\_295-8\_2kb\_allele\_clone3 TTAAATAGCAAAACAAAATATTGAAATAAAACTGTATGATTTTGTCACTATCGTTTATGTG 420  
 Eef1a\_gDNA\_295-8\_2kb\_allele\_clone5 TTAAATAGCAAAACAAAATATTGAAATAAAACTGTATGATTTTGTCACTATCGTTTATGTG 420

Supporting Figure S2

Eef1a\_gDNA\_295-8\_2.4kb\_allele\_clone2 CCCACCATGAAAATTTTACAAAGAAGTGGAACGTGTTTGAAAGTTCATTAGCAAGAACAAA 480  
 Eef1a\_gDNA\_295-8\_2.4kb\_allele\_clone1 CCCACCATGAAAATTTTACAAAGAAGTGGAACGTGTTTGAAAGTTCATTAGCAAGAACAAA 480  
 EF1a\_gDNA\_295-8\_2.4kb\_allele\_clone3 CCCACCATGAAAATTTTACAAAGAAGTGGAACGTGTTTGAAAGTTCATTAGCAAGAACAAA 480  
 EF1a\_gDNA\_295-8\_2kb\_allele\_clone2 CCCACCATGAAAATTTTACAAAGAAGTGGAACGTGTTTGAAAGTTCATTAGCAAGAACAAA 480  
 EF1a\_gDNA\_295-8\_2kb\_allele\_clone3 CCCACCATGAAAATTTTACAAAGAAGTGGAACGTGTTTGAAAGTTCATTAGCAAGAACAAA 480  
 Eef1a\_gDNA\_295-8\_2kb\_allele\_clone5 CCCACCATGAAAATTTTACAAAGAAGTGGAACGTGTTTGAAAGTTCATTAGCAAGAACAAA 480

Eef1a\_gDNA\_295-8\_2.4kb\_allele\_clone2 TCCTAGAAATGTTAGATTTGTGTCAAGAATTC - - AAGATTTTTGTTTCTTGCCAAGT TT 538  
 Eef1a\_gDNA\_295-8\_2.4kb\_allele\_clone1 TCCTAGAAATGTTAGATTTGTGTCAAGAATTC - - AAGATTTTTGTTTCTTGCCAAGT TT 538  
 EF1a\_gDNA\_295-8\_2.4kb\_allele\_clone3 TCCTAGAAATGTTAGATTTGTGTCAAGAATTC - - AAGATTTTTGTTTCTTGCCAAGT TT 538  
 EF1a\_gDNA\_295-8\_2kb\_allele\_clone2 TCCTAGAAATGTTAGATTTGTGTCAAGAATTC TTAAGATTTTTGTTTCTTGCCAAGT AT 540  
 EF1a\_gDNA\_295-8\_2kb\_allele\_clone3 TCCTAGAAATGTTAGATTTGTGTCAAGAATTC TTAAGATTTTTGTTTCTTGCCAAGT AT 540  
 Eef1a\_gDNA\_295-8\_2kb\_allele\_clone5 TCCTAGAAATGTTAGATTTGTGTCAAGAATTC TTAAGATTTTTGTTTCTTGCCAAGT AT 540

Eef1a\_gDNA\_295-8\_2.4kb\_allele\_clone2 TTAGCACTTGCTTAGGGAACATTTAAAATATTAATTTTTATTGAATAAAGAACCAACCT 598  
 Eef1a\_gDNA\_295-8\_2.4kb\_allele\_clone1 TTAGCACTTGCTTAGGGAACATTTAAAATATTAATTTTTATTGAATAAAGAACCAACCT 598  
 EF1a\_gDNA\_295-8\_2.4kb\_allele\_clone3 TTAGCACTTGCTTAGGGAACATTTAAAATATTAATTTTTATTGAATAAAGAACCAACCT 598  
 EF1a\_gDNA\_295-8\_2kb\_allele\_clone2 TTAGCACTTGCTTAGGGAACATTTAAAATATTAATTTTTATTGAATAAAGAACCAACCT 600  
 EF1a\_gDNA\_295-8\_2kb\_allele\_clone3 TTAGCACTTGCTTAGGGAACATTTAAAATATTAATTTTTATTGAATAAAGAACCAACCT 600  
 Eef1a\_gDNA\_295-8\_2kb\_allele\_clone5 TTAGCACTTGCTTAGGGAACATTTAAAATATTAATTTTTATTGAATAAAGAACCAACCT 600

Eef1a\_gDNA\_295-8\_2.4kb\_allele\_clone2 GTTTGACTTTTATTAGTAATAAAGCTAAAATTATGGCCTAAATCATAATTTATTATGTGA 658  
 Eef1a\_gDNA\_295-8\_2.4kb\_allele\_clone1 GTTTGACTTTTATTAGTAATAAAGCTAAAATTATGGCCTAAATCATAATTTATTATGTGA 658  
 EF1a\_gDNA\_295-8\_2.4kb\_allele\_clone3 GTTTGACTTTTATTAGTAATAAAGCTAAAATTATGGCCTAAATCATAATTTATTATGTGA 658  
 EF1a\_gDNA\_295-8\_2kb\_allele\_clone2 GTTTGACTTTTATTAGTAATAAAGCTAAAATTATGGCCTAAATCATAATTTATTATGTGA 660  
 EF1a\_gDNA\_295-8\_2kb\_allele\_clone3 GTTTGACTTTTATTAGTAATAAAGCTAAAATTATGGCCTAAATCATAATTTATTATGTGA 660  
 Eef1a\_gDNA\_295-8\_2kb\_allele\_clone5 GTTTGACTTTTATTAGTAATAAAGCTAAAATTATGGCCTAAATCATAATTTATTATGTGA 660

Eef1a\_gDNA\_295-8\_2.4kb\_allele\_clone2 TTTGGGAAAGAAATTTGTGTTGATTTTTCCATTAATATTGT AAAAAACAAAATCGAAAGTT 718  
 Eef1a\_gDNA\_295-8\_2.4kb\_allele\_clone1 TTTGGGAAAGAAATTTGTGTTGATTTTTCCATTAATATTGT AAAAAACAAAATCGAAAGTT 718  
 EF1a\_gDNA\_295-8\_2.4kb\_allele\_clone3 TTTGGGAAAGAAATTTGTGTTGATTTTTCCATTAATATTGT AAAAAACAAAATCGAAAGTT 718  
 EF1a\_gDNA\_295-8\_2kb\_allele\_clone2 TTTGGGAAAGAAATTTGTGTTGATTTTTCCATTAATATTGT GAAAAACAAAATCGAAAGTT 720  
 EF1a\_gDNA\_295-8\_2kb\_allele\_clone3 TTTGGGAAAGAAATTTGTGTTGATTTTTCCATTAATATTGT GAAAAACAAAATCGAAAGTT 720  
 Eef1a\_gDNA\_295-8\_2kb\_allele\_clone5 TTTGGGAAAGAAATTTGTGTTGATTTTTCCATTAATATTGT GAAAAACAAAATCGAAAGTT 720

Eef1a\_gDNA\_295-8\_2.4kb\_allele\_clone2 AATTTCTTTCAAAAATTACTTTTAGTCATCATTCTCAATCATCCAGGTGAGATTCATGC 778  
 Eef1a\_gDNA\_295-8\_2.4kb\_allele\_clone1 AATTTCTTTCAAAAATTACTTTTAGTCATCATTCTCAATCATCCAGGTGAGATTCATGC 778  
 EF1a\_gDNA\_295-8\_2.4kb\_allele\_clone3 AATTTCTTTCAAAAATTACTTTTAGTCATCATTCTCAATCATCCAGGTGAGATTCATGC 778  
 EF1a\_gDNA\_295-8\_2kb\_allele\_clone2 AATTTTTTTCAAAAATTACTTTTAGTCATCATTCTCAATCATCCAGGTGAGATTCATGC 780  
 EF1a\_gDNA\_295-8\_2kb\_allele\_clone3 AATTTTTTTCAAAAATTACTTTTAGTCATCATTCTCAATCATCCAGGTGAGATTCATGC 780  
 Eef1a\_gDNA\_295-8\_2kb\_allele\_clone5 AATTTTTTTCAAAAATTACTTTTAGTCATCATTCTCAATCATCCAGGTGAGATTCATGC 780

Eef1a\_gDNA\_295-8\_2.4kb\_allele\_clone2 TGGTTACCAACCTGTTTTGGATTGCCACACTGCTCACGTTGCCTGCAAAATTTACAGAATT 838  
 Eef1a\_gDNA\_295-8\_2.4kb\_allele\_clone1 TGGTTACCAACCTGTTTTGGATTGCCACACTGCTCACGTTGCCTGCAAAATTTACAGAATT 838  
 EF1a\_gDNA\_295-8\_2.4kb\_allele\_clone3 TGGTTACCAACCTGTTTTGGATTGCCACACTGCTCACGTTGCCTGCAAAATTTACAGAATT 838  
 EF1a\_gDNA\_295-8\_2kb\_allele\_clone2 TGGTTACCAACCTGTTTTGGATTGCCACACTGCTCACGTTGCCTGCAAAATTTACAGAATT 840  
 EF1a\_gDNA\_295-8\_2kb\_allele\_clone3 TGGTTACCAACCTGTTTTGGATTGCCACACTGCTCACGTTGCCTGCAAAATTTACAGAATT 840  
 Eef1a\_gDNA\_295-8\_2kb\_allele\_clone5 TGGTTACCAACCTGTTTTGGATTGCCACACTGCTCACGTTGCCTGCAAAATTTACAGAATT 840

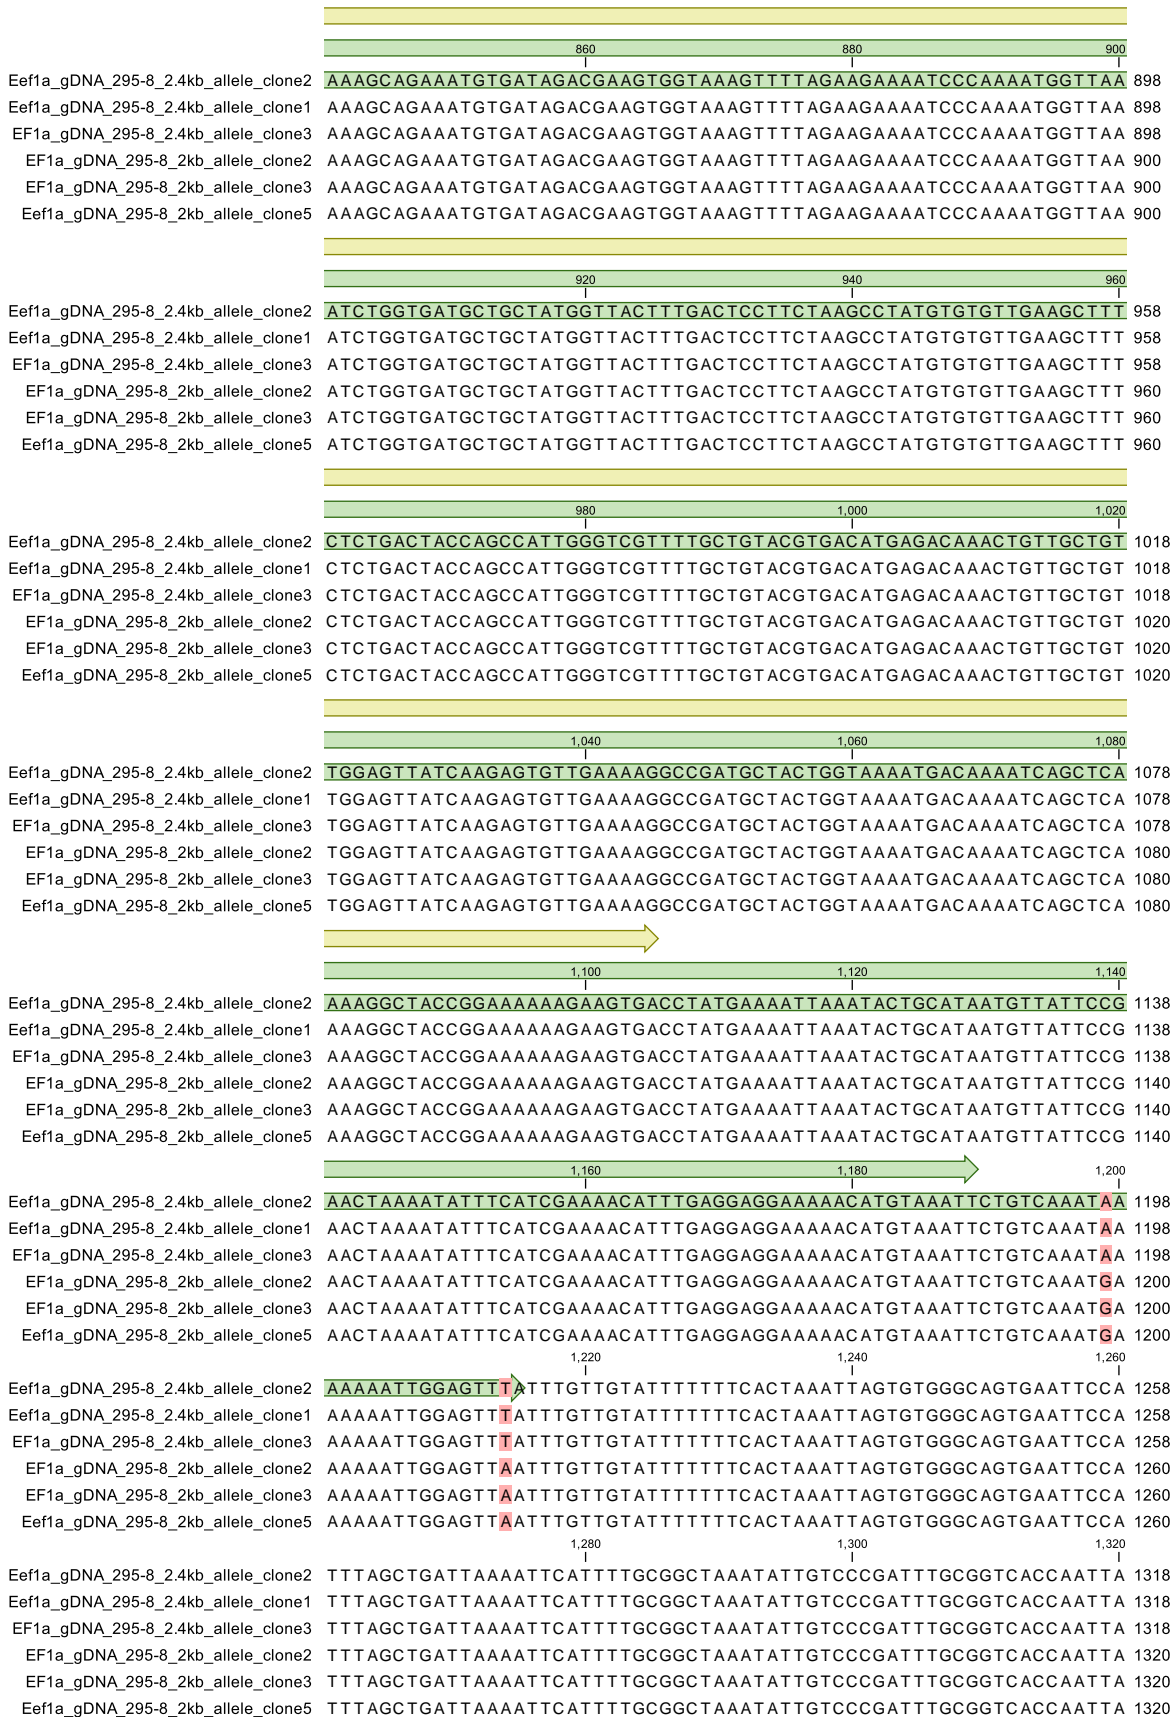

Supporting Figure S2

|                                      |                                                |                                       |                            |       |  |       |  |
|--------------------------------------|------------------------------------------------|---------------------------------------|----------------------------|-------|--|-------|--|
|                                      |                                                | 1,340                                 |                            | 1,360 |  | 1,380 |  |
| Eef1a_gDNA_295-8_2.4kb_allele_clone2 | ATAGTGCGACCTTACAGAAAAA                         | TTTTCTGTCGCGCTAAATTGCA                | ATGCACCTGGATAAA            | 1378  |  |       |  |
| Eef1a_gDNA_295-8_2.4kb_allele_clone1 | ATAGTGCGACCTTACAGAAAAA                         | TTTTCTGTCGCGCTAAATTGCA                | ATGCACCTGGATAAA            | 1378  |  |       |  |
| EF1a_gDNA_295-8_2.4kb_allele_clone3  | ATAGTGCGACCTTACAGAAAAA                         | TTTTCTGTCGCGCTAAATTGCA                | ATGCACCTGGATAAA            | 1378  |  |       |  |
| EF1a_gDNA_295-8_2kb_allele_clone2    | ATAGTGCGACCTTACAGAAAAA                         | -----                                 | -----                      | 1342  |  |       |  |
| EF1a_gDNA_295-8_2kb_allele_clone3    | ATAGTGCGACCTTACAGAAAAA                         | -----                                 | -----                      | 1342  |  |       |  |
| Eef1a_gDNA_295-8_2kb_allele_clone5   | ATAGTGCGACCTTACAGAAAAA                         | -----                                 | -----                      | 1342  |  |       |  |
|                                      |                                                | 1,400                                 |                            | 1,420 |  | 1,440 |  |
| Eef1a_gDNA_295-8_2.4kb_allele_clone2 | AAAGCGCGAAGAAA                                 | ATAAAGCGGAATTAATGTTT                  | GCGAGTGTACTTCGTATTCGCCCGAA | 1438  |  |       |  |
| Eef1a_gDNA_295-8_2.4kb_allele_clone1 | AAAGCGCGAAGAAA                                 | ATAAAGCGGAATTAATGTTT                  | GCGAGTGTACTTCGTATTCGCCCGAA | 1438  |  |       |  |
| EF1a_gDNA_295-8_2.4kb_allele_clone3  | AAAGCGCGAAGAAA                                 | ATAAAGCGGAATTAATGTTT                  | GCGAGTGTACTTCGTATTCGCCCGAA | 1438  |  |       |  |
| EF1a_gDNA_295-8_2kb_allele_clone2    | -----                                          | ATAAAGCGGAATTAATGTTT                  | GCGAGTGTACTTCGTATTCGCCCGAA | 1388  |  |       |  |
| EF1a_gDNA_295-8_2kb_allele_clone3    | -----                                          | ATAAAGCGGAATTAATGTTT                  | GCGAGTGTACTTCGTATTCGCCCGAA | 1388  |  |       |  |
| Eef1a_gDNA_295-8_2kb_allele_clone5   | -----                                          | ATAAAGCGGAATTAATGTTT                  | GCGAGTGTACTTCGTATTCGCCCGAA | 1388  |  |       |  |
|                                      |                                                | 1,460                                 |                            | 1,480 |  | 1,500 |  |
| Eef1a_gDNA_295-8_2.4kb_allele_clone2 | GGTGTTCATATAAAATTTAACTA                        | AGCCCTTTTTAAACAAAACAGACGATATCAATCTTC  | 1498                       |       |  |       |  |
| Eef1a_gDNA_295-8_2.4kb_allele_clone1 | GGTGTTCATATAAAATTTAACTA                        | AAGCCCTTTTTAAACAAAACAGACGATATCAATCTTC | 1498                       |       |  |       |  |
| EF1a_gDNA_295-8_2.4kb_allele_clone3  | GGTGTTCATATAAAATTTAACTA                        | AAGCCCTTTTTAAACAAAACAGACGATATCAATCTTC | 1498                       |       |  |       |  |
| EF1a_gDNA_295-8_2kb_allele_clone2    | GGTGTTCATATAAAATTTAACTA                        | AAGCCCTTTTTAAACAAAACAGACGATATCAATCTTC | 1448                       |       |  |       |  |
| EF1a_gDNA_295-8_2kb_allele_clone3    | GGTGTTCATATAAAATTTAACTA                        | AAGCCCTTTTTAAACAAAACAGACGATATCAATCTTC | 1448                       |       |  |       |  |
| Eef1a_gDNA_295-8_2kb_allele_clone5   | GGTGTTCATATAAAATTTAACTA                        | AAGCCCTTTTTAAACAAAACAGACGATATCAATCTTC | 1448                       |       |  |       |  |
|                                      |                                                | 1,520                                 |                            | 1,540 |  | 1,560 |  |
| Eef1a_gDNA_295-8_2.4kb_allele_clone2 | TGCATGATACAAAAAATTTAAGCTTA                     | GTGTAATATGGCTTAAATG                   | TTTTTAAAG                  | 1552  |  |       |  |
| Eef1a_gDNA_295-8_2.4kb_allele_clone1 | TGCATGATACAAAAAATTTAAGCTTA                     | GTGTAATATGGCTTAAATG                   | TTTTTAAAG                  | 1552  |  |       |  |
| EF1a_gDNA_295-8_2.4kb_allele_clone3  | TGCATGATACAAAAAATTTAAGCTTA                     | GTGTAATATGGCTTAAATG                   | TTTTTAAAG                  | 1552  |  |       |  |
| EF1a_gDNA_295-8_2kb_allele_clone2    | TGCATGATACAAAAAATTTGATCTTA                     | TAGTGAATATGGCTTAAATATG                | TTTTTAAAG                  | 1508  |  |       |  |
| EF1a_gDNA_295-8_2kb_allele_clone3    | TGCATGATACAAAAAATTTGATCTTA                     | TAGTGAATATGGCTTAAATATG                | TTTTTAAAG                  | 1508  |  |       |  |
| Eef1a_gDNA_295-8_2kb_allele_clone5   | TGCATGATACAAAAAATTTGATCTTA                     | TAGTGAATATGGCTTAAATATG                | TTTTTAAAG                  | 1508  |  |       |  |
|                                      |                                                | 1,580                                 |                            | 1,600 |  | 1,620 |  |
| Eef1a_gDNA_295-8_2.4kb_allele_clone2 | TTTCGAGTATTTTCAAGTCATTAAACGGT                  | GTTTTACTATGTGAATATCAACTGTTTGCTCA      | 1612                       |       |  |       |  |
| Eef1a_gDNA_295-8_2.4kb_allele_clone1 | TTTCGAGTATTTTCAAGTCATTAAACGGT                  | GTTTTACTATGTGAATATCAACTGTTTGCTCA      | 1612                       |       |  |       |  |
| EF1a_gDNA_295-8_2.4kb_allele_clone3  | TTTCGAGTATTTTCAAGTCATTAAACGGT                  | GTTTTACTATGTGAATATCAACTGTTTGCTCA      | 1612                       |       |  |       |  |
| EF1a_gDNA_295-8_2kb_allele_clone2    | TTTCGAGTATTTTCAAGTCATTAAACGGT                  | GTTTTACTATGTGAATATCAACTGTTTGCTCA      | 1568                       |       |  |       |  |
| EF1a_gDNA_295-8_2kb_allele_clone3    | TTTCGAGTATTTTCAAGTCATTAAACGGT                  | GTTTTACTATGTGAATATCAACTGTTTGCTCA      | 1568                       |       |  |       |  |
| Eef1a_gDNA_295-8_2kb_allele_clone5   | TTTCGAGTATTTTCAAGTCATTAAACGGT                  | GTTTTACTATGTGAATATCAACTGTTTGCTCA      | 1568                       |       |  |       |  |
|                                      |                                                | 1,640                                 |                            | 1,660 |  | 1,680 |  |
| Eef1a_gDNA_295-8_2.4kb_allele_clone2 | CACAATTATCTTCAGTAATAAATTTTTACTGCTT             | AATTATGTTTAAAGTTGATGATGATTGC          | 1672                       |       |  |       |  |
| Eef1a_gDNA_295-8_2.4kb_allele_clone1 | CACAATTATCTTCAGTAATAAATTTTTACTGCTT             | AATTATGTTTAAAGTTGATGATGATTGC          | 1672                       |       |  |       |  |
| EF1a_gDNA_295-8_2.4kb_allele_clone3  | CACAATTATCTTCAGTAATAAATTTTTACTGCTT             | AATTATGTTTAAAGTTGATGATGATTGC          | 1672                       |       |  |       |  |
| EF1a_gDNA_295-8_2kb_allele_clone2    | CACAATTATCTTCAGTAATAAATTTTTACTGCTT             | AATTATGTTTAAAGTTGATGATGATTGC          | 1628                       |       |  |       |  |
| EF1a_gDNA_295-8_2kb_allele_clone3    | CACAATTATCTTCAGTAATAAATTTTTACTGCTT             | AATTATGTTTAAAGTTGATGATGATTGC          | 1628                       |       |  |       |  |
| Eef1a_gDNA_295-8_2kb_allele_clone5   | CACAATTATCTTCAGTAATAAATTTTTACTGCTT             | AATTATGTTTAAAGTTGATGATGATTGC          | 1628                       |       |  |       |  |
|                                      |                                                | 1,700                                 |                            | 1,720 |  | 1,740 |  |
| Eef1a_gDNA_295-8_2.4kb_allele_clone2 | GGTACCGTGTTTGAGTAGCACATCTTGCTCTAATAACAGAT      | ACCATTTCTAATTGTATGGT                  | 1732                       |       |  |       |  |
| Eef1a_gDNA_295-8_2.4kb_allele_clone1 | GGTACCGTGTTTGAGTAGCACATCTTGCTCTAATAACAGAT      | ACCATTTCTAATTGTATGGT                  | 1732                       |       |  |       |  |
| EF1a_gDNA_295-8_2.4kb_allele_clone3  | GGTACCGTGTTTGAGTAGCACATCTTGCTCTAATAACAGAT      | ACCATTTCTAATTGTATGGT                  | 1732                       |       |  |       |  |
| EF1a_gDNA_295-8_2kb_allele_clone2    | GGTACCGTGTTTGAGTAGCACATCTTGCTCTAATAACAGAT      | ACCATTTCTAATTGTATGGT                  | 1688                       |       |  |       |  |
| EF1a_gDNA_295-8_2kb_allele_clone3    | GGTACCGTGTTTGAGTAGCACATCTTGCTCTAATAACAGAT      | ACCATTTCTAATTGTATGGT                  | 1688                       |       |  |       |  |
| Eef1a_gDNA_295-8_2kb_allele_clone5   | GGTACCGTGTTTGAGTAGCACATCTTGCTCTAATAACAGAT      | ACCATTTCTAATTGTATGGT                  | 1688                       |       |  |       |  |
|                                      |                                                | 1,760                                 |                            | 1,780 |  | 1,800 |  |
| Eef1a_gDNA_295-8_2.4kb_allele_clone2 | AGGCATGCTACCGAACATCAAAAACGTTGCTCA              | ACGTCGGTTATCCAGTTACAAGGCAAG           | 1792                       |       |  |       |  |
| Eef1a_gDNA_295-8_2.4kb_allele_clone1 | AGGCATGCTACCGAACATCAAAAACGTTGCTCA              | ACGTCGGTTATCCAGTTACAAGGCAAG           | 1792                       |       |  |       |  |
| EF1a_gDNA_295-8_2.4kb_allele_clone3  | AGGCATGCTACCGAACATCAAAAACGTTGCTCA              | ACGTCGGTTATCCAGTTACAAGGCAAG           | 1792                       |       |  |       |  |
| EF1a_gDNA_295-8_2kb_allele_clone2    | AGGCATGCTACCGAACATCAAAAACGTTGCTCA              | ACGTCGGTTATCCAGTTACAAGGCAAG           | 1748                       |       |  |       |  |
| EF1a_gDNA_295-8_2kb_allele_clone3    | AGGCATGCTACCGAACATCAAAAACGTTGCTCA              | ACGTCGGTTATCCAGTTACAAGGCAAG           | 1748                       |       |  |       |  |
| Eef1a_gDNA_295-8_2kb_allele_clone5   | AGGCATGCTACCGAACATCAAAAACGTTGCTCA              | ACGTCGGTTATCCAGTTACAAGGCAAG           | 1748                       |       |  |       |  |
|                                      |                                                | 1,820                                 |                            | 1,840 |  | 1,860 |  |
| Eef1a_gDNA_295-8_2.4kb_allele_clone2 | ATGTACTAATCGGCCACGGTATTTTCGGTATCCAAGAATAAAAACG | TGTGTGATTGCGTATA                      | 1852                       |       |  |       |  |
| Eef1a_gDNA_295-8_2.4kb_allele_clone1 | ATGTACTAATCGGCCACGGTATTTTCGGTATCCAAGAATAAAAACG | TGTGTGATTGCGTATA                      | 1852                       |       |  |       |  |
| EF1a_gDNA_295-8_2.4kb_allele_clone3  | ATGTACTAATCGGCCACGGTATTTTCGGTATCCAAGAATAAAAACG | TGTGTGATTGCGTATA                      | 1852                       |       |  |       |  |
| EF1a_gDNA_295-8_2kb_allele_clone2    | ATGTACTAATCGGCCACGGTATTTTCGGTATCCAAGAATAAAAACG | TGTGTGATTGCGTATA                      | 1808                       |       |  |       |  |
| EF1a_gDNA_295-8_2kb_allele_clone3    | ATGTACTAATCGGCCACGGTATTTTCGGTATCCAAGAATAAAAACG | TGTGTGATTGCGTATA                      | 1808                       |       |  |       |  |
| Eef1a_gDNA_295-8_2kb_allele_clone5   | ATGTACTAATCGGCCACGGTATTTTCGGTATCCAAGAATAAAAACG | TGTGTGATTGCGTATA                      | 1808                       |       |  |       |  |

Supporting Figure S2

|                                      |                                                               |       |       |       |      |
|--------------------------------------|---------------------------------------------------------------|-------|-------|-------|------|
|                                      |                                                               | 1,880 | 1,900 | 1,920 |      |
| Eef1a_gDNA_295-8_2.4kb_allele_clone2 | TTAGCGAACATGTGCAACAAGATGTTAAAAACACCTGTTAACTAATAGTCGTTACCATAG  |       |       |       | 1912 |
| Eef1a_gDNA_295-8_2.4kb_allele_clone1 | TTAGCGAACATGTGCAACAAGATGTTAAAAACACCTGTTAACTAATAGTCGTTACCATAG  |       |       |       | 1912 |
| EF1a_gDNA_295-8_2.4kb_allele_clone3  | TTAGCGAACATGTGCAACAAGATGTTAAAAACACCTGTTAACTAATAGTCGTTACCATAG  |       |       |       | 1912 |
| EF1a_gDNA_295-8_2kb_allele_clone2    | TTAGCGAACATGTGCAACAAGATGTTAAAAACACCTGTTAACTAATAGTCGTTACCATAG  |       |       |       | 1868 |
| EF1a_gDNA_295-8_2kb_allele_clone3    | TTAGCGAACATGTGCAACAAGATGTTAAAAACACCTGTTAACTAATAGTCGTTACCATAG  |       |       |       | 1868 |
| Eef1a_gDNA_295-8_2kb_allele_clone5   | TTAGCGAACATGTGCAACAAGATGTTAAAAACACCTGTTAACTAATAGTCGTTACCATAG  |       |       |       | 1868 |
|                                      |                                                               | 1,940 | 1,960 | 1,980 |      |
| Eef1a_gDNA_295-8_2.4kb_allele_clone2 | TGACTAATATTTAATGCAAAATGTAAGAATTCGGTAAAAAAGTTCATTGTTT          |       |       |       | 1972 |
| Eef1a_gDNA_295-8_2.4kb_allele_clone1 | TGACTAATATTTAATGCAAAATGTAAGAATTCGGTAAAAAAGTTCATTGTTT          |       |       |       | 1972 |
| EF1a_gDNA_295-8_2.4kb_allele_clone3  | TGACTAATATTTAATGCAAAATGTAAGAATTCGGTAAAAAAGTTCATTGTTT          |       |       |       | 1972 |
| EF1a_gDNA_295-8_2kb_allele_clone2    | TGACTAATATTTAATGCAAAATGTAAGAATTCGGTAAAAAAGTTCATTGTTT          |       |       |       | 1928 |
| EF1a_gDNA_295-8_2kb_allele_clone3    | TGACTAATATTTAATGCAAAATGTAAGAATTCGGTAAAAAAGTTCATTGTTT          |       |       |       | 1928 |
| Eef1a_gDNA_295-8_2kb_allele_clone5   | TGACTAATATTTAATGCAAAATGTAAGAATTCGGTAAAAAAGTTCATTGTTT          |       |       |       | 1928 |
|                                      |                                                               | 2,000 | 2,020 | 2,040 |      |
| Eef1a_gDNA_295-8_2.4kb_allele_clone2 | GGAGAGTTATTTGACAAAACATAATTTTTGCAATTAATTATTCTTACGCTTCATTGAAGA  |       |       |       | 2032 |
| Eef1a_gDNA_295-8_2.4kb_allele_clone1 | GGAGAGTTATTTGACAAAACATAATTTTTGCAATTAATTATTCTTACGCTTCATTGAAGA  |       |       |       | 2032 |
| EF1a_gDNA_295-8_2.4kb_allele_clone3  | GGAGAGTTATTTGACAAAACATAATTTTTGCAATTAATTATTCTTACGCTTCATTGAAGA  |       |       |       | 2032 |
| EF1a_gDNA_295-8_2kb_allele_clone2    | GGAGAGTTATTTGACAAAACATAATTTTTGCAATTAATTATTCTTACGCTTCATTGAAGA  |       |       |       | 1988 |
| EF1a_gDNA_295-8_2kb_allele_clone3    | GGAGAGTTATTTGACAAAACATAATTTTTGCAATTAATTATTCTTACGCTTCATTGAAGA  |       |       |       | 1988 |
| Eef1a_gDNA_295-8_2kb_allele_clone5   | GGAGAGTTATTTGACAAAACATAATTTTTGCAATTAATTATTCTTACGCTTCATTGAAGA  |       |       |       | 1988 |
|                                      |                                                               | 2,060 | 2,080 | 2,100 |      |
| Eef1a_gDNA_295-8_2.4kb_allele_clone2 | TCATACTTATAAATTTTTTATAAGTAATTATTAGTTATTCCTTGAAAATGGTGTGGACA   |       |       |       | 2092 |
| Eef1a_gDNA_295-8_2.4kb_allele_clone1 | TCATACTTATAAATTTTTTATAAGTAATTATTAGTTATTCCTTGAAAATGGTGTGGACA   |       |       |       | 2092 |
| EF1a_gDNA_295-8_2.4kb_allele_clone3  | TCATACTTATAAATTTTTTATAAGTAATTATTAGTTATTCCTTGAAAATGGTGTGGACA   |       |       |       | 2092 |
| EF1a_gDNA_295-8_2kb_allele_clone2    | TCATACTTATAAATTTTTTATAAGTAATTATTAGTTATTCCTT-----              |       |       |       | 2031 |
| EF1a_gDNA_295-8_2kb_allele_clone3    | TCATACTTATAAATTTTTTATAAGTAATTATTAGTTATTCCTT-----              |       |       |       | 2031 |
| Eef1a_gDNA_295-8_2kb_allele_clone5   | TCATACTTATAAATTTTTTATAAGTAATTATTAGTTATTCCTT-----              |       |       |       | 2031 |
|                                      |                                                               | 2,120 | 2,140 | 2,160 |      |
| Eef1a_gDNA_295-8_2.4kb_allele_clone2 | CTCAAAACGCGTGAATGCCCTCTATTTTTGCTGATACGTCAGCGAGTGTGTCATTCTG    |       |       |       | 2152 |
| Eef1a_gDNA_295-8_2.4kb_allele_clone1 | CTCAAAACGCGTGAATGCCCTCTATTTTTGCTGATACGTCAGCGAGTGTGTCATTCTG    |       |       |       | 2152 |
| EF1a_gDNA_295-8_2.4kb_allele_clone3  | CTCAAAACGCGTGAATGCCCTCTATTTTTGCTGATACGTCAGCGAGTGTGTCATTCTG    |       |       |       | 2152 |
| EF1a_gDNA_295-8_2kb_allele_clone2    | -----                                                         |       |       |       | 2031 |
| EF1a_gDNA_295-8_2kb_allele_clone3    | -----                                                         |       |       |       | 2031 |
| Eef1a_gDNA_295-8_2kb_allele_clone5   | -----                                                         |       |       |       | 2031 |
|                                      |                                                               | 2,180 | 2,200 | 2,220 |      |
| Eef1a_gDNA_295-8_2.4kb_allele_clone2 | GCCGCTAGCAGTTGAATTTTTGAACGTTTCACCAGAAAAGTAAAGTCAGCATTGTTACTTA |       |       |       | 2212 |
| Eef1a_gDNA_295-8_2.4kb_allele_clone1 | GCCGCTAGCAGTTGAATTTTTGAACGTTTCACCAGAAAAGTAAAGTCAGCATTGTTACTTA |       |       |       | 2212 |
| EF1a_gDNA_295-8_2.4kb_allele_clone3  | GCCGCTAGCAGTTGAATTTTTGAACGTTTCACCAGAAAAGTAAAGTCAGCATTGTTACTTA |       |       |       | 2212 |
| EF1a_gDNA_295-8_2kb_allele_clone2    | -----                                                         |       |       |       | 2031 |
| EF1a_gDNA_295-8_2kb_allele_clone3    | -----                                                         |       |       |       | 2031 |
| Eef1a_gDNA_295-8_2kb_allele_clone5   | -----                                                         |       |       |       | 2031 |
|                                      |                                                               | 2,240 | 2,260 | 2,280 |      |
| Eef1a_gDNA_295-8_2.4kb_allele_clone2 | CGTCACTATTGAACCAATAATGACTCATCTCTGCTAACCTTAGTACATAATTCATCCAAA  |       |       |       | 2272 |
| Eef1a_gDNA_295-8_2.4kb_allele_clone1 | CGTCACTATTGAACCAATAATGACTCATCTCTGCTAACCTTAGTACATAATTCATCCAAA  |       |       |       | 2272 |
| EF1a_gDNA_295-8_2.4kb_allele_clone3  | CGTCACTATTGAACCAATAATGACTCATCTCTGCTAACCTTAGTACATAATTCATCCAAA  |       |       |       | 2272 |
| EF1a_gDNA_295-8_2kb_allele_clone2    | -----                                                         |       |       |       | 2031 |
| EF1a_gDNA_295-8_2kb_allele_clone3    | -----                                                         |       |       |       | 2031 |
| Eef1a_gDNA_295-8_2kb_allele_clone5   | -----                                                         |       |       |       | 2031 |
|                                      |                                                               | 2,300 | 2,320 | 2,340 |      |
| Eef1a_gDNA_295-8_2.4kb_allele_clone2 | TTTCGGCAGCGATGTTGCGTTTATTATTGTGCTTCCGAATGTTAAAACCAAGTTCGTAGA  |       |       |       | 2332 |
| Eef1a_gDNA_295-8_2.4kb_allele_clone1 | TTTCGGCAGCGATGTTGCGTTTATTATTGTGCTTCCGAATGTTAAAACCAAGTTCGTAGA  |       |       |       | 2332 |
| EF1a_gDNA_295-8_2.4kb_allele_clone3  | TTTCGGCAGCGATGTTGCGTTTATTATTGTGCTTCCGAATGTTAAAACCAAGTTCGTAGA  |       |       |       | 2332 |
| EF1a_gDNA_295-8_2kb_allele_clone2    | -----                                                         |       |       |       | 2031 |
| EF1a_gDNA_295-8_2kb_allele_clone3    | -----                                                         |       |       |       | 2031 |
| Eef1a_gDNA_295-8_2kb_allele_clone5   | -----                                                         |       |       |       | 2031 |
|                                      |                                                               | 2,360 | 2,380 | 2,400 |      |
| Eef1a_gDNA_295-8_2.4kb_allele_clone2 | ATTAAGATCGCAAAATTTATCTGCAGGTCGTAGAATTATCGATCGTAGAATTATCTTAA   |       |       |       | 2392 |
| Eef1a_gDNA_295-8_2.4kb_allele_clone1 | ATTAAGATCGCAAAATTTATCTGCAGGTCGTAGAATTATCGATCGTAGAATTATCTTAA   |       |       |       | 2392 |
| EF1a_gDNA_295-8_2.4kb_allele_clone3  | ATTAAGATCGCAAAATTTATCTGCAGGTCGTAGAATTATCGATCGTAGAATTATCTTAA   |       |       |       | 2392 |
| EF1a_gDNA_295-8_2kb_allele_clone2    | -----                                                         |       |       |       | 2035 |
| EF1a_gDNA_295-8_2kb_allele_clone3    | -----                                                         |       |       |       | 2035 |
| Eef1a_gDNA_295-8_2kb_allele_clone5   | -----                                                         |       |       |       | 2035 |

Supporting Figure S2

2,420  
|

```

Eef1a_gDNA_295-8_2.4kb_allele_clone2 TCGTAGCGTAAACCAAATGTGAAGT 2417
Eef1a_gDNA_295-8_2.4kb_allele_clone1 TCGTAGCGTAAACCAAATGTGAAGT 2417
EF1a_gDNA_295-8_2.4kb_allele_clone3 TCGTAGCGTAAACCAAATGTGAAGT 2417
EF1a_gDNA_295-8_2kb_allele_clone2 TCGTAGCGTAAACCAAATGTGAAGT 2060
EF1a_gDNA_295-8_2kb_allele_clone3 TCGTAGCGTAAACCAAATGTGAAGT 2060
Eef1a_gDNA_295-8_2kb_allele_clone5 TCGTAGCGTAAACCAAATGTGAAGT 2060

```

**S2 Fig. Alignment of cloned *Eef1a* sequences from female colony 295-8.**

Two PCR amplicons (sized 2.4 kb and 2.0 kb) from the genomic region encoding the 3' end of *Eef1a* in colony 295-8 were cloned, sequenced (3 clones each), and aligned. This revealed two alleles, with the major differences being a 52 bp and a 313 bp indel. Differences are shown in red boxes. Sequence features are shown on and above the top sequence of the alignment. Green, *Eef1a* mRNA as determined by alignments to 291-10 transcripts. Yellow, *Eef1a* coding sequence.
