# Supplementary material for: CRISPR/Cas9-mediated gene knockin in the hydroid Hydractinia symbiolongicarpus
Source: PubMed Central journal article supplement (PMC6122657; doi:10.1186/s12864-018-5032-z), 2018-09-03
Supplement: 12864_2018_5032_MOESM3_ESM.pdf [file 12864_2018_5032_MOESM3_ESM.pdf]

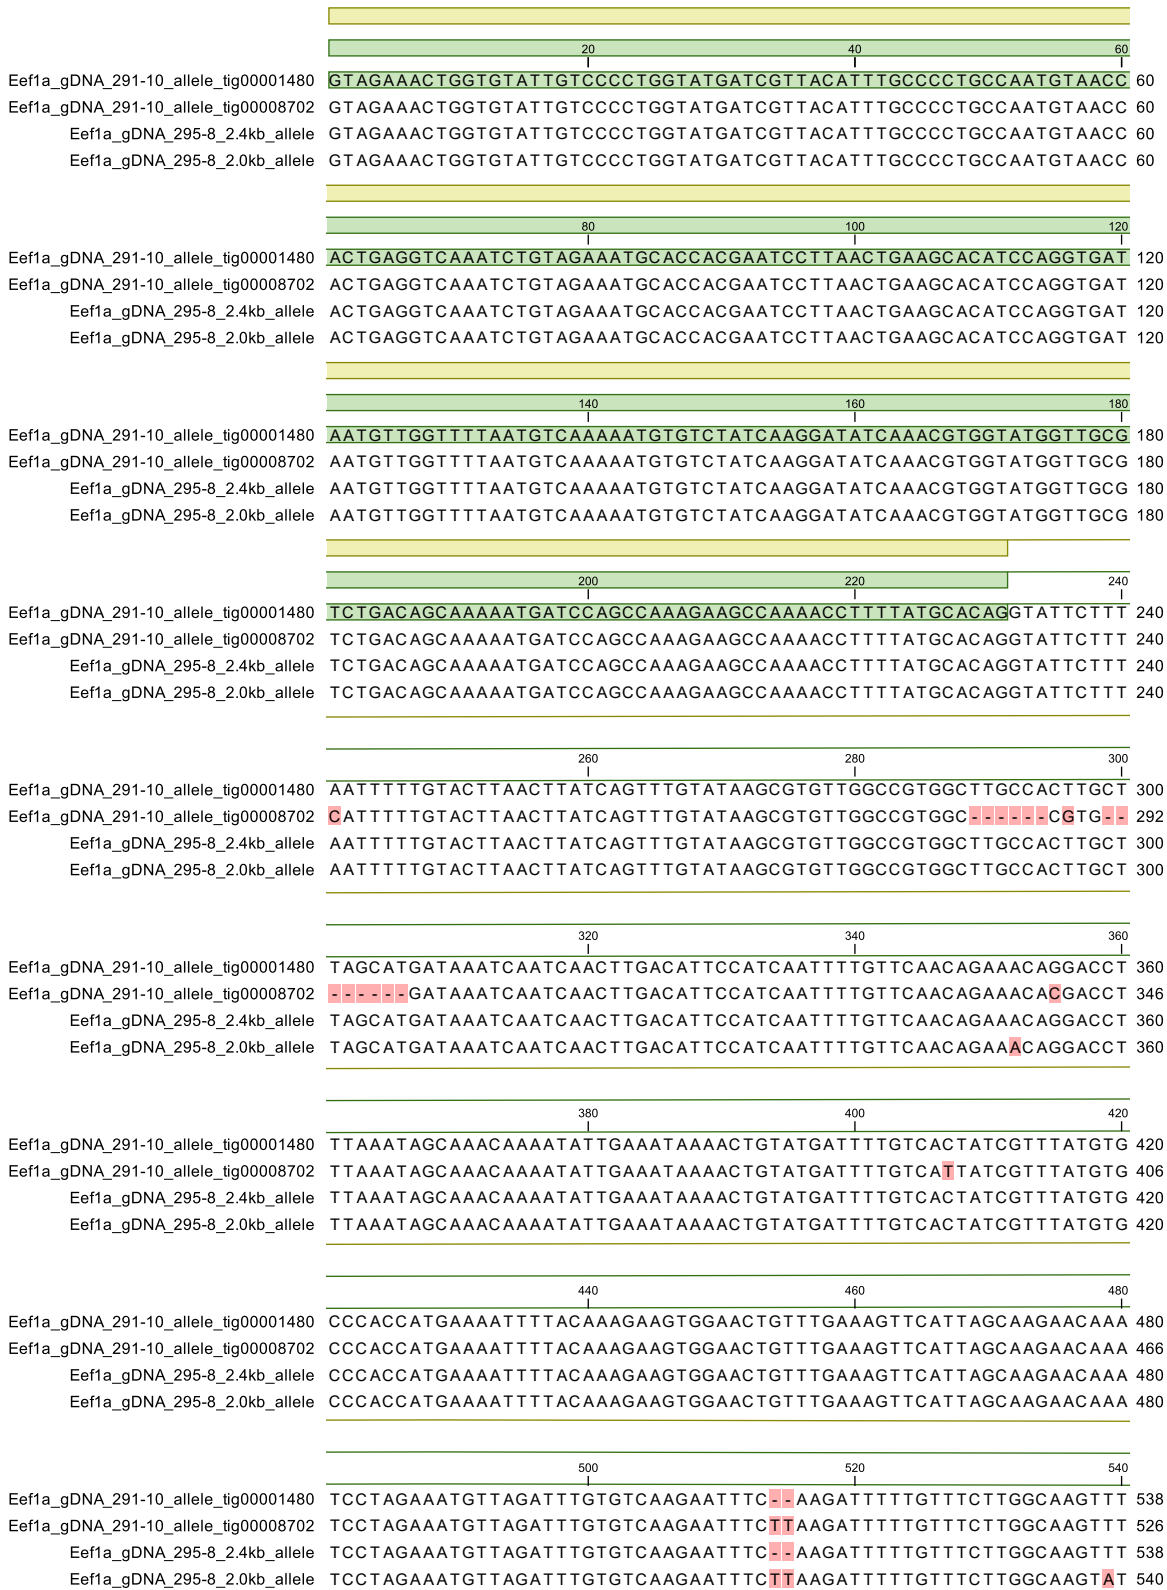

|                                      |                                                               |       |       |      |
|--------------------------------------|---------------------------------------------------------------|-------|-------|------|
|                                      | 560                                                           | 580   | 600   |      |
| Eef1a_gDNA_291-10_allele_tig00001480 | TTAGCACTTGCTTAGGGAACATTTTAAATATTAATTTTTATTGAATAAAGAACCAACCT   |       |       | 598  |
| Eef1a_gDNA_291-10_allele_tig00008702 | TTAGCACTTGCTTAGGGAACATTTTAAATATTAATTTTTATTGAATAAAGAACCAACCT   |       |       | 596  |
| Eef1a_gDNA_295-8_2.4kb_allele        | TTAGCACTTGCTTAGGGAACATTTTAAATATTAATTTTTATTGAATAAAGAACCAACCT   |       |       | 598  |
| Eef1a_gDNA_295-8_2.0kb_allele        | TTGGCACTTGCTTAGGGAACATTTTAAATATTAATTTTTATTGAATAAAGAACCAACCT   |       |       | 600  |
| <hr/>                                |                                                               |       |       |      |
|                                      | 620                                                           | 640   | 660   |      |
| Eef1a_gDNA_291-10_allele_tig00001480 | GTTTGACTTTTATTAGTAATAAAGCTAAAATTATGGCCTAAATCATAATTTATTATGTGA  |       |       | 658  |
| Eef1a_gDNA_291-10_allele_tig00008702 | GTTTGACTTTTATTAGTAATAAAGCTAAAATTATGGCCTAAATCATAATTTATTATGTGA  |       |       | 646  |
| Eef1a_gDNA_295-8_2.4kb_allele        | GTTTGACTTTTATTAGTAATAAAGCTAAAATTATGGCCTAAATCATAATTTATTATGTGA  |       |       | 658  |
| Eef1a_gDNA_295-8_2.0kb_allele        | GTTTGACTTTTATTAGTAATAAAGCTAAAATTATGGCCTAAATCATAATTTATTATGTGA  |       |       | 660  |
| <hr/>                                |                                                               |       |       |      |
|                                      | 680                                                           | 700   | 720   |      |
| Eef1a_gDNA_291-10_allele_tig00001480 | TTTGGGAAAGAAATTTGTGTTGATTTTTCCATTAATATTGTA AAAACAAAATCGAAAGTT |       |       | 718  |
| Eef1a_gDNA_291-10_allele_tig00008702 | TTTGGGAAAGAAATTTGTGTTGATTTTTCCATTAATATTGTA AAAACAAAATCAAAGTT  |       |       | 706  |
| Eef1a_gDNA_295-8_2.4kb_allele        | TTTGGGAAAGAAATTTGTGTTGATTTTTCCATTAATATTGTA AAAACAAAATCGAAAGTT |       |       | 718  |
| Eef1a_gDNA_295-8_2.0kb_allele        | TTTGGGAAAGAAATTTGTGTTGATTTTTCCATTAATATTGTGAAAACAAAATCGAAAGTT  |       |       | 720  |
| <hr/>                                |                                                               |       |       |      |
|                                      | 740                                                           | 760   | 780   |      |
| Eef1a_gDNA_291-10_allele_tig00001480 | AATTTCTTTCAAAAATTA CTTTTAGGTCATCATCTCAATCATCCAGGTGAGATTCATGC  |       |       | 778  |
| Eef1a_gDNA_291-10_allele_tig00008702 | AATTTCTTTCAAAAATTA CTTTTAGGTCATCATCTCAATCATCCAGGTGAGATTCATGC  |       |       | 766  |
| Eef1a_gDNA_295-8_2.4kb_allele        | AATTTCTTTCAAAAATTA CTTTTAGGTCATCATCTCAATCATCCAGGTGAGATTCATGC  |       |       | 778  |
| Eef1a_gDNA_295-8_2.0kb_allele        | AATTTCTTTCAAAAATTA CTTTTAGGTCATCATCTCAATCATCCAGGTGAGATTCATGC  |       |       | 780  |
| <hr/>                                |                                                               |       |       |      |
|                                      | 800                                                           | 820   | 840   |      |
| Eef1a_gDNA_291-10_allele_tig00001480 | TGGTTACCAACCTGTTTTGGATTGCCACACTGCTCACGTTGCCTGCAAAATTTACAGAATT |       |       | 838  |
| Eef1a_gDNA_291-10_allele_tig00008702 | TGGTTACCAACCTGTTTTGGATTGCCACACTGCTCACGTTGCCTGCAAAATTTACAGAATT |       |       | 826  |
| Eef1a_gDNA_295-8_2.4kb_allele        | TGGTTACCAACCTGTTTTGGATTGCCACACTGCTCACGTTGCCTGCAAAATTTACAGAATT |       |       | 838  |
| Eef1a_gDNA_295-8_2.0kb_allele        | TGGTTACCAACCTGTTTTGGATTGCCACACTGCTCACGTTGCCTGCAAAATTTACAGAATT |       |       | 840  |
| <hr/>                                |                                                               |       |       |      |
|                                      | 860                                                           | 880   | 900   |      |
| Eef1a_gDNA_291-10_allele_tig00001480 | AAAGCAGAAATGTGATAGACGAAGTGGTAAAGTTTTAGAAGAAAAATCCCAAAATGGTTAA |       |       | 898  |
| Eef1a_gDNA_291-10_allele_tig00008702 | AAAGCAGAAATGTGATAGACGAAGTGGTAAAGTTTTAGAAGAAAAATCCCAAAATGGTTAA |       |       | 886  |
| Eef1a_gDNA_295-8_2.4kb_allele        | AAAGCAGAAATGTGATAGACGAAGTGGTAAAGTTTTAGAAGAAAAATCCCAAAATGGTTAA |       |       | 898  |
| Eef1a_gDNA_295-8_2.0kb_allele        | AAAGCAGAAATGTGATAGACGAAGTGGTAAAGTTTTAGAAGAAAAATCCCAAAATGGTTAA |       |       | 900  |
| <hr/>                                |                                                               |       |       |      |
|                                      | 920                                                           | 940   | 960   |      |
| Eef1a_gDNA_291-10_allele_tig00001480 | ATCTGGTGATGCTGCTATGGTTACTTTGACTCCTTCTAAGCCTATGTGTGTTGAAGCTTT  |       |       | 958  |
| Eef1a_gDNA_291-10_allele_tig00008702 | ATCTGGTGATGCTGCTATGGTTACTTTGACTCCTTCTAAGCCTATGTGTGTTGAAGCTTT  |       |       | 946  |
| Eef1a_gDNA_295-8_2.4kb_allele        | ATCTGGTGATGCTGCTATGGTTACTTTGACTCCTTCTAAGCCTATGTGTGTTGAAGCTTT  |       |       | 958  |
| Eef1a_gDNA_295-8_2.0kb_allele        | ATCTGGTGATGCTGCTATGGTTACTTTGACTCCTTCTAAGCCTATGTGTGTTGAAGCTTT  |       |       | 960  |
| <hr/>                                |                                                               |       |       |      |
|                                      | 980                                                           | 1,000 | 1,020 |      |
| Eef1a_gDNA_291-10_allele_tig00001480 | CTCTGACTACCAGCCATTGGGTCGTTTTGCTGTACGTGACATGAGACAAACTGTTGCTGT  |       |       | 1018 |
| Eef1a_gDNA_291-10_allele_tig00008702 | CTCTGACTACCAGCCATTGGGTCGTTTTGCTGTACGTGACATGAGACAAACTGTTGCTGT  |       |       | 1006 |
| Eef1a_gDNA_295-8_2.4kb_allele        | CTCTGACTACCAGCCATTGGGTCGTTTTGCTGTACGTGACATGAGACAAACTGTTGCTGT  |       |       | 1018 |
| Eef1a_gDNA_295-8_2.0kb_allele        | CTCTGACTACCAGCCATTGGGTCGTTTTGCTGTACGTGACATGAGACAAACTGTTGCTGT  |       |       | 1020 |
| <hr/>                                |                                                               |       |       |      |
|                                      | 1,040                                                         | 1,060 | 1,080 |      |
| Eef1a_gDNA_291-10_allele_tig00001480 | TGGAGTTATCAAGAGTGTGAAAAGGCCGATGCTACTGGTAAAATGACAAAAATCAGCTCA  |       |       | 1078 |
| Eef1a_gDNA_291-10_allele_tig00008702 | TGGAGTTATCAAGAGTGTGAAAAGGCCGATGCTACTGGTAAAATGACAAAAATCAGCTCA  |       |       | 1066 |
| Eef1a_gDNA_295-8_2.4kb_allele        | TGGAGTTATCAAGAGTGTGAAAAGGCCGATGCTACTGGTAAAATGACAAAAATCAGCTCA  |       |       | 1078 |
| Eef1a_gDNA_295-8_2.0kb_allele        | TGGAGTTATCAAGAGTGTGAAAAGGCCGATGCTACTGGTAAAATGACAAAAATCAGCTCA  |       |       | 1080 |

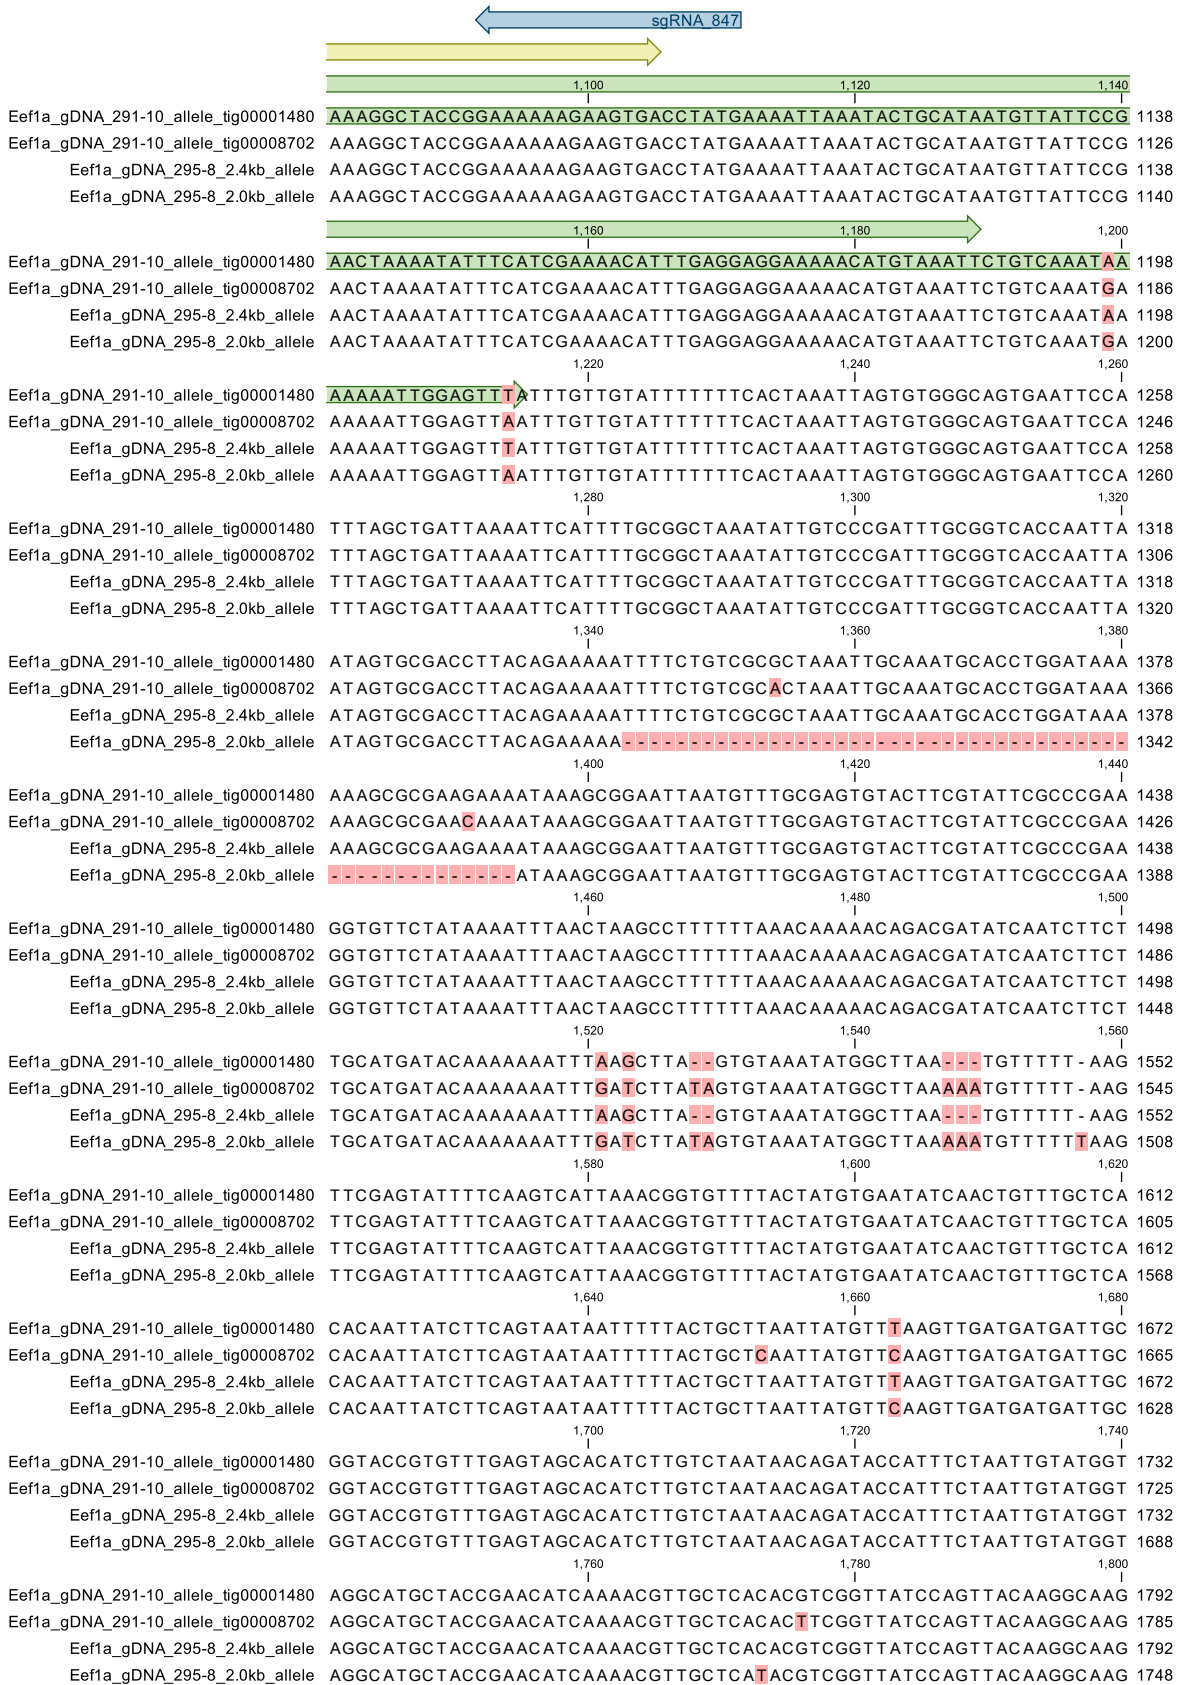

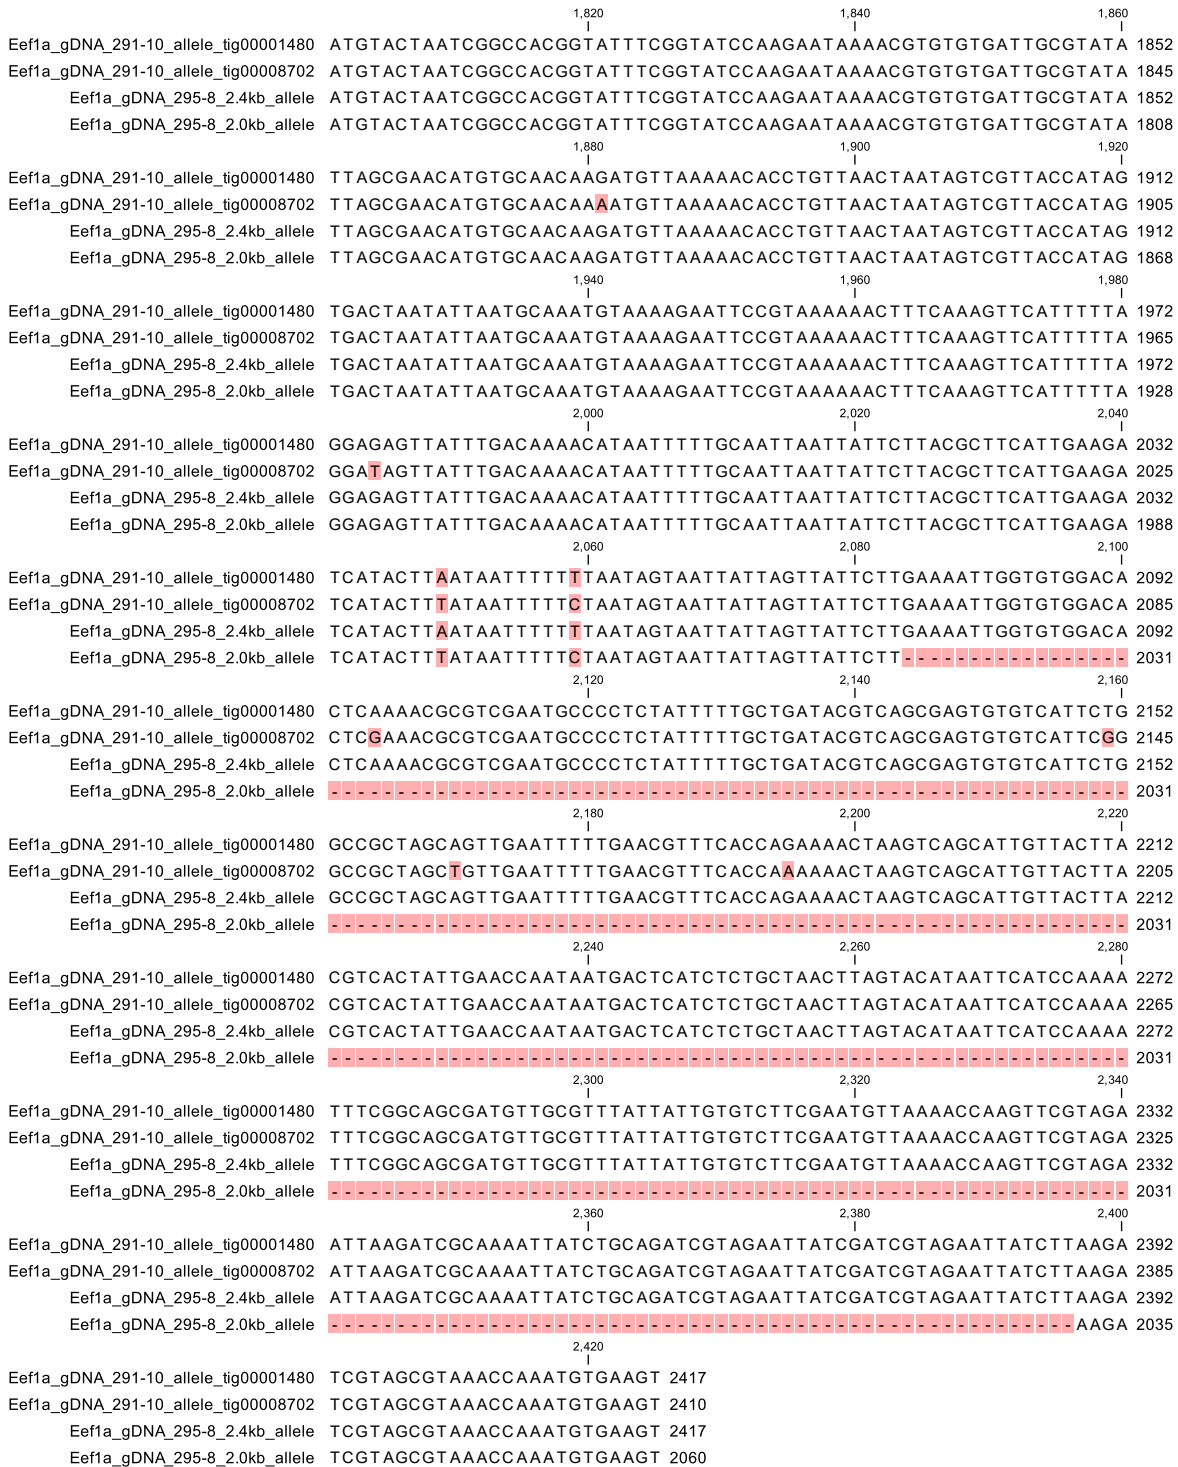

**S3 Fig. Alignment of *Eef1a* alleles from colonies 291-10 and 295-8.** Nucleotide alignment of the region encoding exons 3 and 4 of *Eef1a* from the four alleles in 291-10 and 295-8. Differences are highlighted in red boxes. Sequence features are shown on and above the top sequence of the alignment. Green, mRNA as determined by alignments to 291-10 transcripts. Yellow, coding sequence. Blue, gRNA\_847 binding site.
