# Supplementary material for: CRISPR/Cas9-mediated gene knockin in the hydroid Hydractinia symbiolongicarpus
Source: PubMed Central journal article supplement (PMC6122657; doi:10.1186/s12864-018-5032-z), 2018-09-03
Supplement: 12864_2018_5032_MOESM5_ESM.pdf [file 12864_2018_5032_MOESM5_ESM.pdf]

Pr845

20 40 60

expected sequence of Eef1a-FLAG-2A-eGFP allele GTAGAAACTGGTGTATTGTCCCCCTGGTATGATCGTTACATTTGCCCTGCCAATGTAACC 60

347-10 LHA clone 1 GTAGAAACTGGTGTATTGTCCCCCTGGTATGATCGTTACATTTGCCCTGCCAATGTAACC 60

347-10 LHA clone 2 GTAGAAACTGGTGTATTGTCCCCCTGGTATGATCGTTACATTTGCCCTGCCAATGTAACC 60

347-10 LHA clone3 GTAGAAACTGGTGTATTGTCCCCCTGGTATGATCGTTACATTTGCCCTGCCAATGTAACC 60

354-3 LHA clone 1 GTAGAAACTGGTGTATTGTCCCCCTGGTATGATCGTTACATTTGCCCTGCCAATGTAACC 60

354-3 LHA clone 2 GTAGAAACTGGTGTATTGTCCCCCTGGTATGATCGTTACATTTGCCCTGCCAATGTAACC 60

354-3 LHA clone 3 GTAGAAACTGGTGTATTGTCCCCCTGGTATGATCGTTACATTTGCCCTGCCAATGTAACC 60

354-5\_L5 GTAGAAACTGGTGTATTGTCCCCCTGGTATGATCGTTACATTTGCCCTGCCAATGTAACC 60

354-5\_L6 GTAGAAACTGGTGTATTGTCCCCCTGGTATGATCGTTACATTTGCCCTGCCAATGTAACC 60

354-5\_L8 GTAGAAACTGGTGTATTGTCCCCCTGGTATGATCGTTACATTTGCCCTGCCAATGTAACC 60

347-10\_R5 - - - - -

347-10\_R6 - - - - -

347-10\_R7 - - - - -

354-3\_R1 - - - - -

354-3\_R2 - - - - -

354-3\_R10 - - - - -

354-5\_R9 - - - - -

354-5\_R11 - - - - -

354-5\_R12 - - - - -

80 100 120

expected sequence of Eef1a-FLAG-2A-eGFP allele ACTGAGGTCAAATCTGTAGAAATGCACCACGAATCCTTAACTGAAGCACATCCAGGTGAT 120

347-10 LHA clone 1 ACTGAGGTCAAATCTGTAGAAATGCACCACGAATCCTTAACTGAAGCACATCCAGGTGAT 120

347-10 LHA clone 2 ACTGAGGTCAAATCTGTAGAAATGCACCACGAATCCTTAACTGAAGCACATCCAGGTGAT 120

347-10 LHA clone3 ACTGAGGTCAAATCTGTAGAAATGCACCACGAATCCTTAACTGAAGCACATCCAGGTGAT 120

354-3 LHA clone 1 ACTGAGGTCAAATCTGTAGAAATGCACCACGAATCCTTAACTGAAGCACATCCAGGTGAT 120

354-3 LHA clone 2 ACTGAGGTCAAATCTGTAGAAATGCACCACGAATCCTTAACTGAAGCACATCCAGGTGAT 120

354-3 LHA clone 3 ACTGAGGTCAAATCTGTAGAAATGCACCACGAATCCTTAACTGAAGCACATCCAGGTGAT 120

354-5\_L5 ACTGAGGTCAAATCTGTAGAAATGCACCACGAATCCTTAACTGAAGCACATCCAGGTGAT 120

354-5\_L6 ACTGAGGTCAAATCTGTAGAAATGCACCACGAATCCTTAACTGAAGCACATCCAGGTGAT 120

354-5\_L8 ACTGAGGTCAAATCTGTAGAAATGCACCACGAATCCTTAACTGAAGCACATCCAGGTGAT 120

347-10\_R5 - - - - -

347-10\_R6 - - - - -

347-10\_R7 - - - - -

354-3\_R1 - - - - -

354-3\_R2 - - - - -

354-3\_R10 - - - - -

354-5\_R9 - - - - -

354-5\_R11 - - - - -

354-5\_R12 - - - - -

140 160 180

expected sequence of Eef1a-FLAG-2A-eGFP allele AATGTTGGTTTTAATGTCAAAAATGTGTCTATCAAGGATATCAAACGTGGTATGGTTGCG 180

347-10 LHA clone 1 AATGTTGGTTTTAATGTCAAAAATGTGTCTATCAAGGATATCAAACGTGGTATGGTTGCG 180

347-10 LHA clone 2 AATGTTGGTTTTAATGTCAAAAATGTGTCTATCAAGGATATCAAACGTGGTATGGTTGCG 180

347-10 LHA clone3 AATGTTGGTTTTAATGTCAAAAATGTGTCTATCAAGGATATCAAACGTGGTATGGTTGCG 180

354-3 LHA clone 1 AATGTTGGTTTTAATGTCAAAAATGTGTCTATCAAGGATATCAAACGTGGTATGGTTGCG 180

354-3 LHA clone 2 AATGTTGGTTTTAATGTCAAAAATGTGTCTATCAAGGATATCAAACGTGGTATGGTTGCG 180

354-3 LHA clone 3 AATGTTGGTTTTAATGTCAAAAATGTGTCTATCAAGGATATCAAACGTGGTATGGTTGCG 180

354-5\_L5 AATGTTGGTTTTAATGTCAAAAATGTGTCTATCAAGGATATCAAACGTGGTATGGTTGCG 180

354-5\_L6 AATGTTGGTTTTAATGTCAAAAATGTGTCTATCAAGGATATCAAACGTGGTATGGTTGCG 180

354-5\_L8 AATGTTGGTTTTAATGTCAAAAATGTGTCTATCAAGGATATCAAACGTGGTATGGTTGCG 180

347-10\_R5 - - - - -

347-10\_R6 - - - - -

347-10\_R7 - - - - -

354-3\_R1 - - - - -

354-3\_R2 - - - - -

354-3\_R10 - - - - -

354-5\_R9 - - - - -

354-5\_R11 - - - - -

354-5\_R12 - - - - -

Figure S5 - Page

|                                                |                                                               |      |       |         |            |        |        |        |      |     |
|------------------------------------------------|---------------------------------------------------------------|------|-------|---------|------------|--------|--------|--------|------|-----|
|                                                |                                                               | 200  |       | 220     |            | 240    |        |        |      |     |
| expected sequence of Eef1a-FLAG-2A-eGFP allele | TCTGACAGCAAAAATGATCCAGCCAAAGAAGCCAAAACCTTTTATGCACAGGTATTCTTT  |      |       |         |            | 240    |        |        |      |     |
| 347-10 LHA clone 1                             | TCTGACAGCAAAAATGATCCAGCCAAAGAAGCCAAAACCTTTTATGCACAGGTATTCTTT  |      |       |         |            | 240    |        |        |      |     |
| 347-10 LHA clone 2                             | TCTGACAGCAAAAATGATCCAGCCAAAGAAGCCAAAACCTTTTATGCACAGGTATTCTTT  |      |       |         |            | 240    |        |        |      |     |
| 347-10 LHA clone 3                             | TCTGACAGCAAAAATGATCCAGCCAAAGAAGCCAAAACCTTTTATGCACAGGTATTCTTT  |      |       |         |            | 240    |        |        |      |     |
| 354-3 LHA clone 1                              | TCTGACAGCAAAAATGATCCAGCCAAAGAAGCCAAAACCTTTTATGCACAGGTATTCTTT  |      |       |         |            | 240    |        |        |      |     |
| 354-3 LHA clone 2                              | TCTGACAGCAAAAATGATCCAGCCAAAGAAGCCAAAACCTTTTATGCACAGGTATTCTTT  |      |       |         |            | 240    |        |        |      |     |
| 354-3 LHA clone 3                              | TCTGACAGCAAAAATGATCCAGCCAAAGAAGCCAAAACCTTTTATGCACAGGTATTCTTT  |      |       |         |            | 240    |        |        |      |     |
| 354-5_L5                                       | TCTGACAGCAAAAATGATCCAGCCAAAGAAGCCAAAACCTTTTATGCACAGGTATTCTTT  |      |       |         |            | 240    |        |        |      |     |
| 354-5_L6                                       | TCTGACAGCAAAAATGATCCAGCCAAAGAAGCCAAAACCTTTTATGCACAGGTATTCTTT  |      |       |         |            | 240    |        |        |      |     |
| 354-5_L8                                       | TCTGACAGCAAAAATGATCCAGCCAAAGAAGCCAAAACCTTTTATGCACAGGTATTCTTT  |      |       |         |            | 240    |        |        |      |     |
| 347-10_R5                                      | -                                                             |      |       |         |            | -      |        |        |      |     |
| 347-10_R6                                      | -                                                             |      |       |         |            | -      |        |        |      |     |
| 347-10_R7                                      | -                                                             |      |       |         |            | -      |        |        |      |     |
| 354-3_R1                                       | -                                                             |      |       |         |            | -      |        |        |      |     |
| 354-3_R2                                       | -                                                             |      |       |         |            | -      |        |        |      |     |
| 354-3_R10                                      | -                                                             |      |       |         |            | -      |        |        |      |     |
| 354-5_R9                                       | -                                                             |      |       |         |            | -      |        |        |      |     |
| 354-5_R11                                      | -                                                             |      |       |         |            | -      |        |        |      |     |
| 354-5_R12                                      | -                                                             |      |       |         |            | -      |        |        |      |     |
|                                                |                                                               | 260  |       | 280     |            | 300    |        |        |      |     |
| expected sequence of Eef1a-FLAG-2A-eGFP allele | AATTTTTGTA                                                    | CTTA | AACTT | ATCAGTT | TGATAAGCGT | TGGCCG | TGGCTT | GCCACT | TGCT | 300 |
| 347-10 LHA clone 1                             | AATTTTTGTA                                                    | CTTA | AACTT | ATCAGTT | TGATAAGCGT | TGGCCG | TGGCTT | GCCACT | TGCT | 300 |
| 347-10 LHA clone 2                             | AATTTTTGTA                                                    | CTTA | AACTT | ATCAGTT | TGATAAGCGT | TGGCCG | TGGCTT | GCCACT | TGCT | 300 |
| 347-10 LHA clone 3                             | AATTTTTGTA                                                    | CTTA | AACTT | ATCAGTT | TGATAAGCGT | TGGCCG | TGGCTT | GCCACT | TGCT | 300 |
| 354-3 LHA clone 1                              | AATTTTTGTA                                                    | CTTA | AACTT | ATCAGTT | TGATAAGCGT | TGGCCG | TGGCTT | GCCACT | TGCT | 300 |
| 354-3 LHA clone 2                              | AATTTTTGTA                                                    | CTTA | AACTT | ATCAGTT | TGATAAGCGT | TGGCCG | TGGCTT | GCCACT | TGCT | 300 |
| 354-3 LHA clone 3                              | AATTTTTGTA                                                    | CTTA | AACTT | ATCAGTT | TGATAAGCGT | TGGCCG | TGGCTT | GCCACT | TGCT | 300 |
| 354-5_L5                                       | AATTTTTGTA                                                    | CTTA | AACTT | ATCAGTT | TGATAAGCGT | TGGCCG | TGGCTT | GCCACT | TGCT | 300 |
| 354-5_L6                                       | AATTTTTGTA                                                    | CTTA | AACTT | ATCAGTT | TGATAAGCGT | TGGCCG | TGGCTT | GCCACT | TGCT | 300 |
| 354-5_L8                                       | AATTTTTGTA                                                    | CTTA | AACTT | ATCAGTT | TGATAAGCGT | TGGCCG | TGGCTT | GCCACT | TGCT | 300 |
| 347-10_R5                                      | -                                                             |      |       |         |            |        |        |        |      | -   |
| 347-10_R6                                      | -                                                             |      |       |         |            |        |        |        |      | -   |
| 347-10_R7                                      | -                                                             |      |       |         |            |        |        |        |      | -   |
| 354-3_R1                                       | -                                                             |      |       |         |            |        |        |        |      | -   |
| 354-3_R2                                       | -                                                             |      |       |         |            |        |        |        |      | -   |
| 354-3_R10                                      | -                                                             |      |       |         |            |        |        |        |      | -   |
| 354-5_R9                                       | -                                                             |      |       |         |            |        |        |        |      | -   |
| 354-5_R11                                      | -                                                             |      |       |         |            |        |        |        |      | -   |
| 354-5_R12                                      | -                                                             |      |       |         |            |        |        |        |      | -   |
|                                                |                                                               | 320  |       | 340     |            | 360    |        |        |      |     |
| expected sequence of Eef1a-FLAG-2A-eGFP allele | TAGCATGATAAATCAATCAACTTGACATTCCATCAATTTTGTTC AACAGAAACAGGACCT |      |       |         |            | 360    |        |        |      |     |
| 347-10 LHA clone 1                             | TAGCATGATAAATCAATCAACTTGACATTCCATCAATTTTGTTC AACAGAAACAGGACCT |      |       |         |            | 360    |        |        |      |     |
| 347-10 LHA clone 2                             | TAGCATGATAAATCAATCAACTTGACATTCCATCAATTTTGTTC AACAGAAACAGGACCT |      |       |         |            | 360    |        |        |      |     |
| 347-10 LHA clone 3                             | TAGCATGATAAATCAATCAACTTGACATTCCATCAATTTTGTTC AACAGAAACAGGACCT |      |       |         |            | 360    |        |        |      |     |
| 354-3 LHA clone 1                              | TAGCATGATAAATCAATCAACTTGACATTCCATCAATTTTGTTC AACAGAAACAGGACCT |      |       |         |            | 360    |        |        |      |     |
| 354-3 LHA clone 2                              | TAGCATGATAAATCAATCAACTTGACATTCCATCAATTTTGTTC AACAGAAACAGGACCT |      |       |         |            | 360    |        |        |      |     |
| 354-3 LHA clone 3                              | TAGCATGATAAATCAATCAACTTGACATTCCATCAATTTTGTTC AACAGAAACAGGACCT |      |       |         |            | 360    |        |        |      |     |
| 354-5_L5                                       | TAGCATGATAAATCAATCAACTTGACATTCCATCAATTTTGTTC AACAGAAACAGGACCT |      |       |         |            | 360    |        |        |      |     |
| 354-5_L6                                       | TAGCATGATAAATCAATCAACTTGACATTCCATCAATTTTGTTC AACAGAAACAGGACCT |      |       |         |            | 360    |        |        |      |     |
| 354-5_L8                                       | TAGCATGATAAATCAATCAACTTGACATTCCATCAATTTTGTTC AACAGAAACAGGACCT |      |       |         |            | 360    |        |        |      |     |
| 347-10_R5                                      | -                                                             |      |       |         |            | -      |        |        |      |     |
| 347-10_R6                                      | -                                                             |      |       |         |            | -      |        |        |      |     |
| 347-10_R7                                      | -                                                             |      |       |         |            | -      |        |        |      |     |
| 354-3_R1                                       | -                                                             |      |       |         |            | -      |        |        |      |     |
| 354-3_R2                                       | -                                                             |      |       |         |            | -      |        |        |      |     |
| 354-3_R10                                      | -                                                             |      |       |         |            | -      |        |        |      |     |
| 354-5_R9                                       | -                                                             |      |       |         |            | -      |        |        |      |     |
| 354-5_R11                                      | -                                                             |      |       |         |            | -      |        |        |      |     |
| 354-5_R12                                      | -                                                             |      |       |         |            | -      |        |        |      |     |



|                                                |                  |              |                |               |                |
|------------------------------------------------|------------------|--------------|----------------|---------------|----------------|
|                                                |                  | 560          | 580            | 600           |                |
| expected sequence of Eef1a-FLAG-2A-eGFP allele | AGCACTTGCTTAGGGA | ACTATTTAAA   | ATTAATTTTT     | ATTGAATAAAGA  | ACCAACCTGT 600 |
| 347-10 LHA clone 1                             | AGCACTTGCTTAGGGA | ACTATTTAAA   | ATTAATTTTT     | ATTGAATAAAGA  | ACCAACCTGT 600 |
| 347-10 LHA clone 2                             | AGCACTTGCTTAGGGA | ACTATTTAAA   | ATTAATTTTT     | ATTGAATAAAGA  | ACCAACCTGT 600 |
| 347-10 LHA clone 3                             | AGCACTTGCTTAGGGA | ACTATTTAAA   | ATTAATTTTT     | ATTGAATAAAGA  | ACCAACCTGT 600 |
| 354-3 LHA clone 1                              | AGCACTTGCTTAGGGA | ACTATTTAAA   | ATTAATTTTT     | ATTGAATAAAGA  | ACCAACCTGT 600 |
| 354-3 LHA clone 2                              | AGCACTTGCTTAGGGA | ACTATTTAAA   | ATTAATTTTT     | ATTGAATAAAGA  | ACCAACCTGT 600 |
| 354-3 LHA clone 3                              | AGCACTTGCTTAGGGA | ACTATTTAAA   | ATTAATTTTT     | ATTGAATAAAGA  | ACCAACCTGT 600 |
| 354-5_L5                                       | AGCACTTGCTTAGGGA | ACTATTTAAA   | ATTAATTTTT     | ATTGAATAAAGA  | ACCAACCTGT 600 |
| 354-5_L6                                       | AGCACTTGCTTAGGGA | ACTATTTAAA   | ATTAATTTTT     | ATTGAATAAAGA  | ACCAACCTGT 600 |
| 354-5_L8                                       | AGCACTTGCTTAGGGA | ACTATTTAAA   | ATTAATTTTT     | ATTGAATAAAGA  | ACCAACCTGT 600 |
| 347-10_R5                                      | -                |              |                |               | -              |
| 347-10_R6                                      | -                |              |                |               | -              |
| 347-10_R7                                      | -                |              |                |               | -              |
| 354-3_R1                                       | -                |              |                |               | -              |
| 354-3_R2                                       | -                |              |                |               | -              |
| 354-3_R10                                      | -                |              |                |               | -              |
| 354-5_R9                                       | -                |              |                |               | -              |
| 354-5_R11                                      | -                |              |                |               | -              |
| 354-5_R12                                      | -                |              |                |               | -              |
|                                                |                  | 620          | 640            | 660           |                |
| expected sequence of Eef1a-FLAG-2A-eGFP allele | TTGACTTTTATTAGTA | AATAAAGCTAAA | ATTATGGCCTAAAT | CATAATTTATTAT | TGTGATT 660    |
| 347-10 LHA clone 1                             | TTGACTTTTATTAGTA | AATAAAGCTAAA | ATTATGGCCTAAAT | CATAATTTATTAT | TGTGATT 660    |
| 347-10 LHA clone 2                             | TTGACTTTTATTAGTA | AATAAAGCTAAA | ATTATGGCCTAAAT | CATAATTTATTAT | TGTGATT 660    |
| 347-10 LHA clone 3                             | TTGACTTTTATTAGTA | AATAAAGCTAAA | ATTATGGCCTAAAT | CATAATTTATTAT | TGTGATT 660    |
| 354-3 LHA clone 1                              | TTGACTTTTATTAGTA | AATAAAGCTAAA | ATTATGGCCTAAAT | CATAATTTATTAT | TGTGATT 660    |
| 354-3 LHA clone 2                              | TTGACTTTTATTAGTA | AATAAAGCTAAA | ATTATGGCCTAAAT | CATAATTTATTAT | TGTGATT 660    |
| 354-3 LHA clone 3                              | TTGACTTTTATTAGTA | AATAAAGCTAAA | ATTATGGCCTAAAT | CATAATTTATTAT | TGTGATT 660    |
| 354-5_L5                                       | TTGACTTTTATTAGTA | AATAAAGCTAAA | ATTATGGCCTAAAT | CATAATTTATTAT | TGTGATT 660    |
| 354-5_L6                                       | TTGACTTTTATTAGTA | AATAAAGCTAAA | ATTATGGCCTAAAT | CATAATTTATTAT | TGTGATT 660    |
| 354-5_L8                                       | TTGACTTTTATTAGTA | AATAAAGCTAAA | ATTATGGCCTAAAT | CATAATTTATTAT | TGTGATT 660    |
| 347-10_R5                                      | -                |              |                |               | -              |
| 347-10_R6                                      | -                |              |                |               | -              |
| 347-10_R7                                      | -                |              |                |               | -              |
| 354-3_R1                                       | -                |              |                |               | -              |
| 354-3_R2                                       | -                |              |                |               | -              |
| 354-3_R10                                      | -                |              |                |               | -              |
| 354-5_R9                                       | -                |              |                |               | -              |
| 354-5_R11                                      | -                |              |                |               | -              |
| 354-5_R12                                      | -                |              |                |               | -              |
|                                                |                  | 680          | 700            | 720           |                |
| expected sequence of Eef1a-FLAG-2A-eGFP allele | TGGGAAAGAAATTTGT | GTTGATTTTTCC | ATTAATTTGTA    | AAAAACAAAATCG | AAAGTTAA 720   |
| 347-10 LHA clone 1                             | TGGGAAAGAAATTTGT | GTTGATTTTTCC | ATTAATTTGTA    | AAAAACAAAATCG | AAAGTTAA 720   |
| 347-10 LHA clone 2                             | TGGGAAAGAAATTTGT | GTTGATTTTTCC | ATTAATTTGTA    | AAAAACAAAATCG | AAAGTTAA 720   |
| 347-10 LHA clone 3                             | TGGGAAAGAAATTTGT | GTTGATTTTTCC | ATTAATTTGTA    | AAAAACAAAATCG | AAAGTTAA 720   |
| 354-3 LHA clone 1                              | TGGGAAAGAAATTTGT | GTTGATTTTTCC | ATTAATTTGTA    | AAAAACAAAATCG | AAAGTTAA 720   |
| 354-3 LHA clone 2                              | TGGGAAAGAAATTTGT | GTTGATTTTTCC | ATTAATTTGTA    | AAAAACAAAATCG | AAAGTTAA 720   |
| 354-3 LHA clone 3                              | TGGGAAAGAAATTTGT | GTTGATTTTTCC | ATTAATTTGTA    | AAAAACAAAATCG | AAAGTTAA 720   |
| 354-5_L5                                       | TGGGAAAGAAATTTGT | GTTGATTTTTCC | ATTAATTTGTA    | AAAAACAAAATCG | AAAGTTAA 720   |
| 354-5_L6                                       | TGGGAAAGAAATTTGT | GTTGATTTTTCC | ATTAATTTGTA    | AAAAACAAAATCG | AAAGTTAA 720   |
| 354-5_L8                                       | TGGGAAAGAAATTTGT | GTTGATTTTTCC | ATTAATTTGTA    | AAAAACAAAATCG | AAAGTTAA 720   |
| 347-10_R5                                      | -                |              |                |               | -              |
| 347-10_R6                                      | -                |              |                |               | -              |
| 347-10_R7                                      | -                |              |                |               | -              |
| 354-3_R1                                       | -                |              |                |               | -              |
| 354-3_R2                                       | -                |              |                |               | -              |
| 354-3_R10                                      | -                |              |                |               | -              |
| 354-5_R9                                       | -                |              |                |               | -              |
| 354-5_R11                                      | -                |              |                |               | -              |
| 354-5_R12                                      | -                |              |                |               | -              |

|                                                |                                                              |     |  |     |  |     |     |
|------------------------------------------------|--------------------------------------------------------------|-----|--|-----|--|-----|-----|
|                                                |                                                              | 740 |  | 760 |  | 780 |     |
| expected sequence of Eef1a-FLAG-2A-eGFP allele | TTTCTTTCAAAAATTACTTTTAGGTCATCATTCTCAATCATCCAGGTGAGATTCATGCTG |     |  |     |  |     | 780 |
| 347-10 LHA clone 1                             | TTTCTTTCAAAAATTACTTTTAGGTCATCATTCTCAATCATCCAGGTGAGATTCATGCTG |     |  |     |  |     | 780 |
| 347-10 LHA clone 2                             | TTTCTTTCAAAAATTACTTTTAGGTCATCATTCTCAATCATCCAGGTGAGATTCATGCTG |     |  |     |  |     | 780 |
| 347-10 LHA clone 3                             | TTTCTTTCAAAAATTACTTTTAGGTCATCATTCTCAATCATCCAGGTGAGATTCATGCTG |     |  |     |  |     | 780 |
| 354-3 LHA clone 1                              | TTTCTTTCAAAAATTACTTTTAGGTCATCATTCTCAATCATCCAGGTGAGATTCATGCTG |     |  |     |  |     | 780 |
| 354-3 LHA clone 2                              | TTTCTTTCAAAAATTACTTTTAGGTCATCATTCTCAATCATCCAGGTGAGATTCATGCTG |     |  |     |  |     | 780 |
| 354-3 LHA clone 3                              | TTTCTTTCAAAAATTACTTTTAGGTCATCATTCTCAATCATCCAGGTGAGATTCATGCTG |     |  |     |  |     | 780 |
| 354-5_L5                                       | TTTCTTTCAAAAATTACTTTTAGGTCATCATTCTCAATCATCCAGGTGAGATTCATGCTG |     |  |     |  |     | 780 |
| 354-5_L6                                       | TTTCTTTCAAAAATTACTTTTAGGTCATCATTCTCAATCATCCAGGTGAGATTCATGCTG |     |  |     |  |     | 780 |
| 354-5_L8                                       | TTTCTTTCAAAAATTACTTTTAGGTCATCATTCTCAATCATCCAGGTGAGATTCATGCTG |     |  |     |  |     | 780 |
| 347-10_R5                                      | -                                                            |     |  |     |  |     | -   |
| 347-10_R6                                      | -                                                            |     |  |     |  |     | -   |
| 347-10_R7                                      | -                                                            |     |  |     |  |     | -   |
| 354-3_R1                                       | -                                                            |     |  |     |  |     | -   |
| 354-3_R2                                       | -                                                            |     |  |     |  |     | -   |
| 354-3_R10                                      | -                                                            |     |  |     |  |     | -   |
| 354-5_R9                                       | -                                                            |     |  |     |  |     | -   |
| 354-5_R11                                      | -                                                            |     |  |     |  |     | -   |
| 354-5_R12                                      | -                                                            |     |  |     |  |     | -   |
|                                                |                                                              | 800 |  | 820 |  | 840 |     |
| expected sequence of Eef1a-FLAG-2A-eGFP allele | GTTACCAACCTGTTTTGGATTGCCACACTGCTCACGTTGCCTGCAAAATTTACAGAATTA |     |  |     |  |     | 840 |
| 347-10 LHA clone 1                             | GTTACCAACCTGTTTTGGATTGCCACACTGCTCACGTTGCCTGCAAAATTTACAGAATTA |     |  |     |  |     | 840 |
| 347-10 LHA clone 2                             | GTTACCAACCTGTTTTGGATTGCCACACTGCTCACGTTGCCTGCAAAATTTACAGAATTA |     |  |     |  |     | 840 |
| 347-10 LHA clone 3                             | GTTACCAACCTGTTTTGGATTGCCACACTGCTCACGTTGCCTGCAAAATTTACAGAATTA |     |  |     |  |     | 840 |
| 354-3 LHA clone 1                              | GTTACCAACCTGTTTTGGATTGCCACACTGCTCACGTTGCCTGCAAAATTTACAGAATTA |     |  |     |  |     | 840 |
| 354-3 LHA clone 2                              | GTTACCAACCTGTTTTGGATTGCCACACTGCTCACGTTGCCTGCAAAATTTACAGAATTA |     |  |     |  |     | 840 |
| 354-3 LHA clone 3                              | GTTACCAACCTGTTTTGGATTGCCACACTGCTCACGTTGCCTGCAAAATTTACAGAATTA |     |  |     |  |     | 840 |
| 354-5_L5                                       | GTTACCAACCTGTTTTGGATTGCCACACTGCTCACGTTGCCTGCAAAATTTACAGAATTA |     |  |     |  |     | 840 |
| 354-5_L6                                       | GTTACCAACCTGTTTTGGATTGCCACACTGCTCACGTTGCCTGCAAAATTTACAGAATTA |     |  |     |  |     | 840 |
| 354-5_L8                                       | GTTACCAACCTGTTTTGGATTGCCACACTGCTCACGTTGCCTGCAAAATTTACAGAATTA |     |  |     |  |     | 840 |
| 347-10_R5                                      | -                                                            |     |  |     |  |     | -   |
| 347-10_R6                                      | -                                                            |     |  |     |  |     | -   |
| 347-10_R7                                      | -                                                            |     |  |     |  |     | -   |
| 354-3_R1                                       | -                                                            |     |  |     |  |     | -   |
| 354-3_R2                                       | -                                                            |     |  |     |  |     | -   |
| 354-3_R10                                      | -                                                            |     |  |     |  |     | -   |
| 354-5_R9                                       | -                                                            |     |  |     |  |     | -   |
| 354-5_R11                                      | -                                                            |     |  |     |  |     | -   |
| 354-5_R12                                      | -                                                            |     |  |     |  |     | -   |
|                                                |                                                              | 860 |  | 880 |  | 900 |     |
| expected sequence of Eef1a-FLAG-2A-eGFP allele | AGCAGAAATGTGATAGACGAAGTGGTAAAGTTTTAGAAGAAAATCCCAAAATGGTTAAAT |     |  |     |  |     | 900 |
| 347-10 LHA clone 1                             | AGCAGAAATGTGATAGACGAAGTGGTAAAGTTTTAGAAGAAAATCCCAAAATGGTTAAAT |     |  |     |  |     | 900 |
| 347-10 LHA clone 2                             | AGCAGAAATGTGATAGACGAAGTGGTAAAGTTTTAGAAGAAAATCCCAAAATGGTTAAAT |     |  |     |  |     | 900 |
| 347-10 LHA clone 3                             | AGCAGAAATGTGATAGACGAAGTGGTAAAGTTTTAGAAGAAAATCCCAAAATGGTTAAAT |     |  |     |  |     | 900 |
| 354-3 LHA clone 1                              | AGCAGAAATGTGATAGACGAAGTGGTAAAGTTTTAGAAGAAAATCCCAAAATGGTTAAAT |     |  |     |  |     | 900 |
| 354-3 LHA clone 2                              | AGCAGAAATGTGATAGACGAAGTGGTAAAGTTTTAGAAGAAAATCCCAAAATGGTTAAAT |     |  |     |  |     | 900 |
| 354-3 LHA clone 3                              | AGCAGAAATGTGATAGACGAAGTGGTAAAGTTTTAGAAGAAAATCCCAAAATGGTTAAAT |     |  |     |  |     | 900 |
| 354-5_L5                                       | AGCAGAAATGTGATAGACGAAGTGGTAAAGTTTTAGAAGAAAATCCCAAAATGGTTAAAT |     |  |     |  |     | 900 |
| 354-5_L6                                       | AGCAGAAATGTGATAGACGAAGTGGTAAAGTTTTAGAAGAAAATCCCAAAATGGTTAAAT |     |  |     |  |     | 900 |
| 354-5_L8                                       | AGCAGAAATGTGATAGACGAAGTGGTAAAGTTTTAGAAGAAAATCCCAAAATGGTTAAAT |     |  |     |  |     | 900 |
| 347-10_R5                                      | -                                                            |     |  |     |  |     | -   |
| 347-10_R6                                      | -                                                            |     |  |     |  |     | -   |
| 347-10_R7                                      | -                                                            |     |  |     |  |     | -   |
| 354-3_R1                                       | -                                                            |     |  |     |  |     | -   |
| 354-3_R2                                       | -                                                            |     |  |     |  |     | -   |
| 354-3_R10                                      | -                                                            |     |  |     |  |     | -   |
| 354-5_R9                                       | -                                                            |     |  |     |  |     | -   |
| 354-5_R11                                      | -                                                            |     |  |     |  |     | -   |
| 354-5_R12                                      | -                                                            |     |  |     |  |     | -   |

expected sequence of Eef1a-FLAG-2A-eGFP allele CTGGTGATGCTGCTATGGTTACTTTGACTCCTTCTAAGCCTATGTGTGTTGAAGCTTTCT 960  
 347-10 LHA clone 1 CTGGTGATGCTGCTATGGTTACTTTGACTCCTTCTAAGCCTATGTGTGTTGAAGCTTTCT 960  
 347-10 LHA clone 2 CTGGTGATGCTGCTATGGTTACTTTGACTCCTTCTAAGCCTATGTGTGTTGAAGCTTTCT 960  
 347-10 LHA clone 3 CTGGTGATGCTGCTATGGTTACTTTGACTCCTTCTAAGCCTATGTGTGTTGAAGCTTTCT 960  
 354-3 LHA clone 1 CTGGTGATGCTGCTATGGTTACTTTGACTCCTTCTAAGCCTATGTGTGTTGAAGCTTTCT 960  
 354-3 LHA clone 2 CTGGTGATGCTGCTATGGTTACTTTGACTCCTTCTAAGCCTATGTGTGTTGAAGCTTTCT 960  
 354-3 LHA clone 3 CTGGTGATGCTGCTATGGTTACTTTGACTCCTTCTAAGCCTATGTGTGTTGAAGCTTTCT 960  
 354-5\_L5 CTGGTGATGCTGCTATGGTTACTTTGACTCCTTCTAAGCCTATGTGTGTTGAAGCTTTCT 960  
 354-5\_L6 CTGGTGATGCTGCTATGGTTACTTTGACTCCTTCTAAGCCTATGTGTGTTGAAGCTTTCT 960  
 354-5\_L8 CTGGTGATGCTGCTATGGTTACTTTGACTCCTTCTAAGCCTATGTGTGTTGAAGCTTTCT 960  
 347-10\_R5 - - - - -  
 347-10\_R6 - - - - -  
 347-10\_R7 - - - - -  
 354-3\_R1 - - - - -  
 354-3\_R2 - - - - -  
 354-3\_R10 - - - - -  
 354-5\_R9 - - - - -  
 354-5\_R11 - - - - -  
 354-5\_R12 - - - - -

expected sequence of Eef1a-FLAG-2A-eGFP allele CTGACTACCAGCCATTGGGTCGTTTTGCTGTACGTGACATGAGACAAACTGTTGCTGTTG 1020  
 347-10 LHA clone 1 CTGACTACCAGCCATTGGGTCGTTTTGCTGTACGTGACATGAGACAAACTGTTGCTGTTG 1020  
 347-10 LHA clone 2 CTGACTACCAGCCATTGGGTCGTTTTGCTGTACGTGACATGAGACAAACTGTTGCTGTTG 1020  
 347-10 LHA clone 3 CTGACTACCAGCCATTGGGTCGTTTTGCTGTACGTGACATGAGACAAACTGTTGCTGTTG 1020  
 354-3 LHA clone 1 CTGACTACCAGCCATTGGGTCGTTTTGCTGTACGTGACATGAGACAAACTGTTGCTGTTG 1020  
 354-3 LHA clone 2 CTGACTACCAGCCATTGGGTCGTTTTGCTGTACGTGACATGAGACAAACTGTTGCTGTTG 1020  
 354-3 LHA clone 3 CTGACTACCAGCCATTGGGTCGTTTTGCTGTACGTGACATGAGACAAACTGTTGCTGTTG 1020  
 354-5\_L5 CTGACTACCAGCCATTGGGTCGTTTTGCTGTACGTGACATGAGACAAACTGTTGCTGTTG 1020  
 354-5\_L6 CTGACTACCAGCCATTGGGTCGTTTTGCTGTACGTGACATGAGACAAACTGTTGCTGTTG 1020  
 354-5\_L8 CTGACTACCAGCCATTGGGTCGTTTTGCTGTACGTGACATGAGACAAACTGTTGCTGTTG 1020  
 347-10\_R5 - - - - -  
 347-10\_R6 - - - - -  
 347-10\_R7 - - - - -  
 354-3\_R1 - - - - -  
 354-3\_R2 - - - - -  
 354-3\_R10 - - - - -  
 354-5\_R9 - - - - -  
 354-5\_R11 - - - - -  
 354-5\_R12 - - - - -

expected sequence of Eef1a-FLAG-2A-eGFP allele GAGTTATCAAGAGTGTTGAAAAGGCCGATGCTACTGGTAAAATGACAAAATCAGCTCAAA 1080  
 347-10 LHA clone 1 GAGTTATCAAGAGTGTTGAAAAGGCCGATGCTACTGGTAAAATGACAAAATCAGCTCAAA 1080  
 347-10 LHA clone 2 GAGTTATCAAGAGTGTTGAAAAGGCCGATGCTACTGGTAAAATGACAAAATCAGCTCAAA 1080  
 347-10 LHA clone 3 GAGTTATCAAGAGTGTTGAAAAGGCCGATGCTACTGGTAAAATGACAAAATCAGCTCAAA 1080  
 354-3 LHA clone 1 GAGTTATCAAGAGTGTTGAAAAGGCCGATGCTACTGGTAAAATGACAAAATCAGCTCAAA 1080  
 354-3 LHA clone 2 GAGTTATCAAGAGTGTTGAAAAGGCCGATGCTACTGGTAAAATGACAAAATCAGCTCAAA 1080  
 354-3 LHA clone 3 GAGTTATCAAGAGTGTTGAAAAGGCCGATGCTACTGGTAAAATGACAAAATCAGCTCAAA 1080  
 354-5\_L5 GAGTTATCAAGAGTGTTGAAAAGGCCGATGCTACTGGTAAAATGACAAAATCAGCTCAAA 1080  
 354-5\_L6 GAGTTATCAAGAGTGTTGAAAAGGCCGATGCTACTGGTAAAATGACAAAATCAGCTCAAA 1080  
 354-5\_L8 GAGTTATCAAGAGTGTTGAAAAGGCCGATGCTACTGGTAAAATGACAAAATCAGCTCAAA 1080  
 347-10\_R5 - - - - -  
 347-10\_R6 - - - - -  
 347-10\_R7 - - - - -  
 354-3\_R1 - - - - -  
 354-3\_R2 - - - - -  
 354-3\_R10 - - - - -  
 354-5\_R9 - - - - -  
 354-5\_R11 - - - - -  
 354-5\_R12 - - - - -

expected sequence of Eef1a-FLAG-2A-eGFP allele  
 347-10 LHA clone 1  
 347-10 LHA clone 2  
 347-10 LHA clone3  
 354-3 LHA clone 1  
 354-3 LHA clone 2  
 354-3 LHA clone 3  
 354-5\_L5  
 354-5\_L6  
 354-5\_L8  
 347-10\_R5  
 347-10\_R6  
 347-10\_R7  
 354-3\_R1  
 354-3\_R2  
 354-3\_R10  
 354-5\_R9  
 354-5\_R11  
 354-5\_R12

expected sequence of Eef1a-FLAG-2A-eGFP allele  
 347-10 LHA clone 1  
 347-10 LHA clone 2  
 347-10 LHA clone3  
 354-3 LHA clone 1  
 354-3 LHA clone 2  
 354-3 LHA clone 3  
 354-5\_L5  
 354-5\_L6  
 354-5\_L8  
 347-10\_R5  
 347-10\_R6  
 347-10\_R7  
 354-3\_R1  
 354-3\_R2  
 354-3\_R10  
 354-5\_R9  
 354-5\_R11  
 354-5\_R12

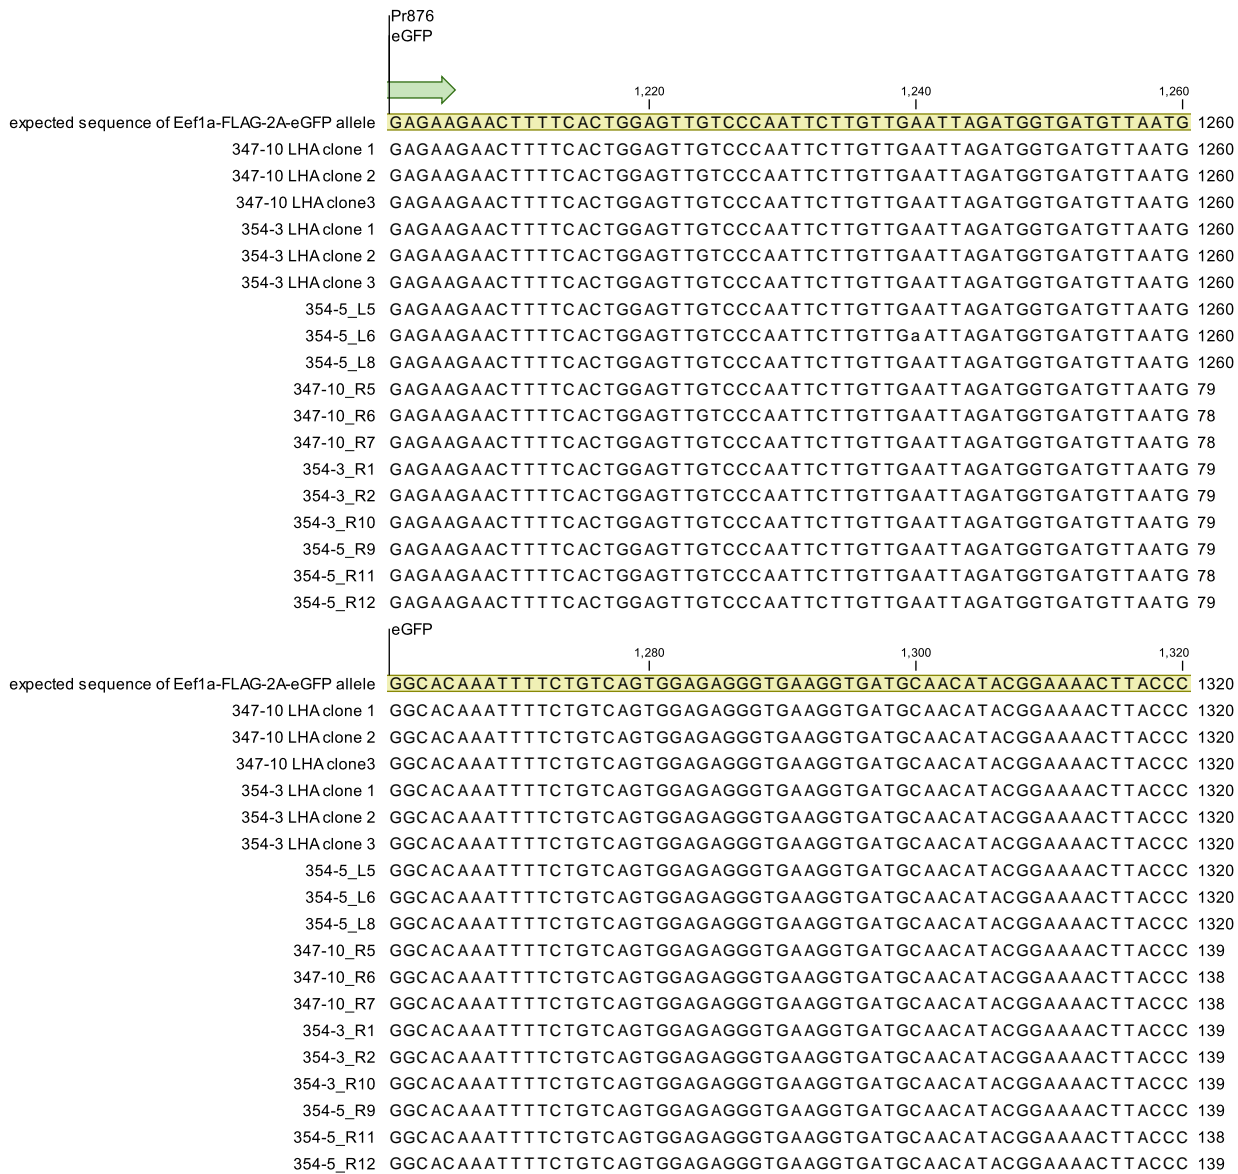





eGFP

1,520 1,540 1,560

expected sequence of Eef1a-FLAG-2A-eGFP allele **GGAACTACAAGACACGTGCTGAAGTCAAGTTTGAAGGTGATACCCTTGTTAATAGAATCG** 1560

347-10 LHA clone 1 GGAACTACAAGACACGTGCTGAAGTCAAGTTTGAAGGTGATACCCTTGTTAATAGAATCG 1560

347-10 LHA clone 2 GGAACTACAAGACACGTGCTGAAGTCAAGTTTGAAGGTGATACCCTTGTTAATAGAATCG 1560

347-10 LHA clone3 GGAACTACAAGACACGTGCTGAAGTCAAGTTTGAAGGTGATACCCTTGTTAATAGAATCG 1560

354-3 LHA clone 1 GGAACTACAAGACACGTGCTGAAGTCAAGTTTGAAGGTGATACCCTTGTTAATAGAATCG 1560

354-3 LHA clone 2 GGAACTACAAGACACGTGCTGAAGTCAAGTTTGAAGGTGATACCCTTGTTAATAGAATCG 1560

354-3 LHA clone 3 GGAACTACAAGACACGTGCTGAAGTCAAGTTTGAAGGTGATACCCTTGTTAATAGAATCG 1560

354-5\_L5 GGAACTACAAGACACGTGCTGAAGTCAAGTTTGAAGGTGATACCCTTGTTAATAGAATCG 1560

354-5\_L6 GGAACTACAAGACACGTGCTGAAGTCAAGTTTGAAGGTGATACCCTTGTTAATAGAATCG 1560

354-5\_L8 GGAACTACAAGACACGTGCTGAAGTCAAGTTTGAAGGTGATACCCTTGTTAATAGAATCG 1560

347-10\_R5 GGAACTACAAGACACGTGCTGAAGTCAAGTTTGAAGGTGATACCCTTGTTAATAGAATCG 379

347-10\_R6 GGAACTACAAGACACGTGCTGAAGTCAAGTTTGAAGGTGATACCCTTGTTAATAGAATCG 378

347-10\_R7 GGAACTACAAGACACGTGCTGAAGTCAAGTTTGAAGGTGATACCCTTGTTAATAGAATCG 378

354-3\_R1 GGAACTACAAGACACGTGCTGAAGTCAAGTTTGAAGGTGATACCCTTGTTAATAGAATCG 379

354-3\_R2 GGAACTACAAGACACGTGCTGAAGTCAAGTTTGAAGGTGATACCCTTGTTAATAGAATCG 379

354-3\_R10 GGAACTACAAGACACGTGCTGAAGTCAAGTTTGAAGGTGATACCCTTGTTAATAGAATCG 379

354-5\_R9 GGAACTACAAGACACGTGCTGAAGTCAAGTTTGAAGGTGATACCCTTGTTAATAGAATCG 379

354-5\_R11 GGAACTACAAGACACGTGCTGAAGTCAAGTTTGAAGGTGATACCCTTGTTAATAGAATCG 378

354-5\_R12 GGAACTACAAGACACGTGCTGAAGTCAAGTTTGAAGGTGATACCCTTGTTAATAGAATCG 379

eGFP

1,580 1,600 1,620

expected sequence of Eef1a-FLAG-2A-eGFP allele **AGTTAAAAGGTATTGATTTTAAAGAAGATGGAAACATTCTTGGACACAAATTGGAATACA** 1620

347-10 LHA clone 1 AGTTAAAAGGTATTGATTTTAAAGAAGATGGAAACATTCTTGGACACAAATTGGAATACA 1620

347-10 LHA clone 2 AGTTAAAAGGTATTGATTTTAAAGAAGATGGAAACATTCTTGGACACAAATTGGAATACA 1620

347-10 LHA clone3 AGTTAAAAGGTATTGATTTTAAAGAAGATGGAAACATTCTTGGACACAAATTGGAATACA 1620

354-3 LHA clone 1 AGTTAAAAGGTATTGATTTTAAAGAAGATGGAAACATTCTTGGACACAAATTGGAATACA 1620

354-3 LHA clone 2 AGTTAAAAGGTATTGATTTTAAAGAAGATGGAAACATTCTTGGACACAAATTGGAATACA 1620

354-3 LHA clone 3 AGTTAAAAGGTATTGATTTTAAAGAAGATGGAAACATTCTTGGACACAAATTGGAATACA 1620

354-5\_L5 AGTTAAAAGGTATTGATTTTAAAGAAGATGGAAACATTCTTGGACACAAATTGGAATACA 1620

354-5\_L6 AGTTAAAAGGTATTGATTTTAAAGAAGATGGAAACATTCTTGGACACAAATTGGAATACA 1620

354-5\_L8 AGTTAAAAGGTATTGATTTTAAAGAAGATGGAAACATTCTTGGACACAAATTGGAATACA 1620

347-10\_R5 AGTTAAAAGGTATTGATTTTAAAGAAGATGGAAACATTCTTGGACACAAATTGGAATACA 439

347-10\_R6 AGTTAAAAGGTATTGATTTTAAAGAAGATGGAAACATTCTTGGACACAAATTGGAATACA 438

347-10\_R7 AGTTAAAAGGTATTGATTTTAAAGAAGATGGAAACATTCTTGGACACAAATTGGAATACA 438

354-3\_R1 AGTTAAAAGGTATTGATTTTAAAGAAGATGGAAACATTCTTGGACACAAATTGGAATACA 439

354-3\_R2 AGTTAAAAGGTATTGATTTTAAAGAAGATGGAAACATTCTTGGACACAAATTGGAATACA 439

354-3\_R10 AGTTAAAAGGTATTGATTTTAAAGAAGATGGAAACATTCTTGGACACAAATTGGAATACA 439

354-5\_R9 AGTTAAAAGGTATTGATTTTAAAGAAGATGGAAACATTCTTGGACACAAATTGGAATACA 439

354-5\_R11 AGTTAAAAGGTATTGATTTTAAAGAAGATGGAAACATTCTTGGACACAAATTGGAATACA 438

354-5\_R12 AGTTAAAAGGTATTGATTTTAAAGAAGATGGAAACATTCTTGGACACAAATTGGAATACA 439

eGFP

1,640 1,660 1,680

expected sequence of Eef1a-FLAG-2A-eGFP allele **ACTATAACTCACACAATGTATACATCATGGCAGACAAACAAAAGAATGGAATCAAAGTTA** 1680

347-10 LHA clone 1 ACTATAACTCACACAATGTATACATCATGGCAGACAAACAAAAGAATGGAATCAAAGTTA 1680

347-10 LHA clone 2 ACTATAACTCACACAATGTATACATCATGGCAGACAAACAAAAGAATGGAATCAAAGTTA 1680

347-10 LHA clone3 ACTATAACTCACACAATGTATACATCATGGCAGACAAACAAAAGAATGGAATCAAAGTTA 1680

354-3 LHA clone 1 ACTATAACTCACACAATGTATACATCATGGCAGACAAACAAAAGAATGGAATCAAAGTTA 1680

354-3 LHA clone 2 ACTATAACTCACACAATGTATACATCATGGCAGACAAACAAAAGAATGGAATCAAAGTTA 1680

354-3 LHA clone 3 ACTATAACTCACACAATGTATACATCATGGCAGACAAACAAAAGAATGGAATCAAAGTTA 1680

354-5\_L5 ACTATAACTCACACAATGTATACATCATGGCAGACAAACAAAAGAATGGAATCAAAGTTA 1680

354-5\_L6 ACTATAACTCACACAATGTATACATCATGGCAGACAAACAAAAGAATGGAATCAAAGTTA 1680

354-5\_L8 ACTATAACTCACACAATGTATACATCATGGCAGACAAACAAAAGAATGGAATCAAAGTTA 1680

347-10\_R5 ACTATAACTCACACAATGTATACATCATGGCAGACAAACAAAAGAATGGAATCAAAGTTA 499

347-10\_R6 ACTATAACTCACACAATGTATACATCATGGCAGACAAACAAAAGAATGGAATCAAAGTTA 498

347-10\_R7 ACTATAACTCACACAATGTATACATCATGGCAGACAAACAAAAGAATGGAATCAAAGTTA 498

354-3\_R1 ACTATAACTCACACAATGTATACATCATGGCAGACAAACAAAAGAATGGAATCAAAGTTA 499

354-3\_R2 ACTATAACTCACACAATGTATACATCATGGCAGACAAACAAAAGAATGGAATCAAAGTTA 499

354-3\_R10 ACTATAACTCACACAATGTATACATCATGGCAGACAAACAAAAGAATGGAATCAAAGTTA 499

354-5\_R9 ACTATAACTCACACAATGTATACATCATGGCAGACAAACAAAAGAATGGAATCAAAGTTA 499

354-5\_R11 ACTATAACTCACACAATGTATACATCATGGCAGACAAACAAAAGAATGGAATCAAAGTTA 498

354-5\_R12 ACTATAACTCACACAATGTATACATCATGGCAGACAAACAAAAGAATGGAATCAAAGTTA 499

eGFP

1,700 1,720 1,740

expected sequence of Eef1a-FLAG-2A-eGFP allele **ACTTCAAAATTAGACACAACATTGAAGATGGAAGCGTTCAACTAGCAGACCATTATCAAC** 1740

347-10 LHA clone 1 ACTTCAAAATTAGACACAACATTGAAGATGGAAGCGTTCAACTAGCAGACCATTATCAAC 1740

347-10 LHA clone 2 ACTTCAAAATTAGACACAACATTGAAGATGGAAGCGTTCAACTAGCAGACCATTATCAAC 1740

347-10 LHA clone3 ACTTCAAAATTAGACACAACATTGAAGATGGAAGCGTTCAACTAGCAGACCATTATCAAC 1740

354-3 LHA clone 1 ACTTCAAAATTAGACACAACATTGAAGATGGAAGCGTTCAACTAGCAGACCATTATCAAC 1740

354-3 LHA clone 2 ACTTCAAAATTAGACACAACATTGAAGATGGAAGCGTTCAACTAGCAGACCATTATCAAC 1740

354-3 LHA clone 3 ACTTCAAAATTAGACACAACATTGAAGATGGAAGCGTTCAACTAGCAGACCATTATCAAC 1740

354-5\_L5 ACTTCAAAATTAGACACAACATTGAAGATGGAAGCGTTCAACTAGCAGACCATTATCAAC 1740

354-5\_L6 ACTTCAAAATTAGACACAACATTGAAGATGGAAGCGTTCAACTAGCAGACCATTATCAAC 1740

354-5\_L8 ACTTCAAAATTAGACACAACATTGAAGATGGAAGCGTTCAACTAGCAGACCATTATCAAC 1740

347-10\_R5 ACTTCAAAATTAGACACAACATTGAAGATGGAAGCGTTCAACTAGCAGACCATTATCAAC 559

347-10\_R6 ACTTCAAAATTAGACACAACATTGAAGATGGAAGCGTTCAACTAGCAGACCATTATCAAC 558

347-10\_R7 ACTTCAAAATTAGACACAACATTGAAGATGGAAGCGTTCAACTAGCAGACCATTATCAAC 558

354-3\_R1 ACTTCAAAATTAGACACAACATTGAAGATGGAAGCGTTCAACTAGCAGACCATTATCAAC 559

354-3\_R2 ACTTCAAAATTAGACACAACATTGAAGATGGAAGCGTTCAACTAGCAGACCATTATCAAC 559

354-3\_R10 ACTTCAAAATTAGACACAACATTGAAGATGGAAGCGTTCAACTAGCAGACCATTATCAAC 559

354-5\_R9 ACTTCAAAATTAGACACAACATTGAAGATGGAAGCGTTCAACTAGCAGACCATTATCAAC 559

354-5\_R11 ACTTCAAAATTAGACACAACATTGAAGATGGAAGCGTTCAACTAGCAGACCATTATCAAC 558

354-5\_R12 ACTTCAAAATTAGACACAACATTGAAGATGGAAGCGTTCAACTAGCAGACCATTATCAAC 559

eGFP

1,760 1,780 1,800

expected sequence of Eef1a-FLAG-2A-eGFP allele **AAAATCTCCAATTGGCGATGGCCCTGTCTTTTACCAGACAACCATTACCTGTCCACAC** 1800

347-10 LHA clone 1 AAAATCTCCAATTGGCGATGGCCCTGTCTTTTACCAGACAACCATTACCTGTCCACAC 1800

347-10 LHA clone 2 AAAATCTCCAATTGGCGATGGCCCTGTCTTTTACCAGACAACCATTACCTGTCCACAC 1800

347-10 LHA clone3 AAAATCTCCAATTGGCGATGGCCCTGTCTTTTACCAGACAACCATTACCTGTCCACAC 1800

354-3 LHA clone 1 AAAATCTCCAATTGGCGATGGCCCTGTCTTTTACCAGACAACCATTACCTGTCCACAC 1800

354-3 LHA clone 2 AAAATCTCCAATTGGCGATGGCCCTGTCTTTTACCAGACAACCATTACCTGTCCACAC 1800

354-3 LHA clone 3 AAAATCTCCAATTGGCGATGGCCCTGTCTTTTACCAGACAACCATTACCTGTCCACAC 1800

354-5\_L5 AAAATCTCCAATTGGCGATGGCCCTGTCTTTTACCAGACAACCATTACCTGTCCACAC 1800

354-5\_L6 AAAATCTCCAATTGGCGATGGCCCTGTCTTTTACCAGACAACCATTACCTGTCCACAC 1800

354-5\_L8 AAAATCTCCAATTGGCGATGGCCCTGTCTTTTACCAGACAACCATTACCTGTCCACAC 1800

347-10\_R5 AAAATCTCCAATTGGCGATGGCCCTGTCTTTTACCAGACAACCATTACCTGTCCACAC 619

347-10\_R6 AAAATCTCCAATTGGCGATGGCCCTGTCTTTTACCAGACAACCATTACCTGTCCACAC 618

347-10\_R7 AAAATCTCCAATTGGCGATGGCCCTGTCTTTTACCAGACAACCATTACCTGTCCACAC 618

354-3\_R1 AAAATCTCCAATTGGCGATGGCCCTGTCTTTTACCAGACAACCATTACCTGTCCACAC 619

354-3\_R2 AAAATCTCCAATTGGCGATGGCCCTGTCTTTTACCAGACAACCATTACCTGTCCACAC 619

354-3\_R10 AAAATCTCCAATTGGCGATGGCCCTGTCTTTTACCAGACAACCATTACCTGTCCACAC 619

354-5\_R9 AAAATCTCCAATTGGCGATGGCCCTGTCTTTTACCAGACAACCATTACCTGTCCACAC 619

354-5\_R11 AAAATCTCCAATTGGCGATGGCCCTGTCTTTTACCAGACAACCATTACCTGTCCACAC 618

354-5\_R12 AAAATCTCCAATTGGCGATGGCCCTGTCTTTTACCAGACAACCATTACCTGTCCACAC 619

eGFP Pr875

1,820 1,840 1,860

expected sequence of Eef1a-FLAG-2A-eGFP allele **AATCTGCCCTTTCGAAAGATCCCAACGAAAAGAGAGACCACATGGTCCTTCTTGAGTTTG** 1860

347-10 LHA clone 1 AATCTGCCCTTTCGAAAGATCCCAACGAAAAGAGAGACCACATGGTCCTTCTTGAGTTTG 1831

347-10 LHA clone 2 AATCTGCCCTTTCGAAAGATCCCAACGAAAAGAGAGACCACATGGTCCTTCTTGAGTTTG 1831

347-10 LHA clone3 AATCTGCCCTTTCGAAAGATCCCAACGAAAAGAGAGACCACATGGTCCTTCTTGAGTTTG 1831

354-3 LHA clone 1 AATCTGCCCTTTCGAAAGATCCCAACGAAAAGAGAGACCACATGGTCCTTCTTGAGTTTG 1831

354-3 LHA clone 2 AATCTGCCCTTTCGAAAGATCCCAACGAAAAGAGAGACCACATGGTCCTTCTTGAGTTTG 1831

354-3 LHA clone 3 AATCTGCCCTTTCGAAAGATCCCAACGAAAAGAGAGACCACATGGTCCTTCTTGAGTTTG 1831

354-5\_L5 AATCTGCCCTTTCGAAAGATCCCAACGAAAAGAGAGACCACATGGTCCTTCTTGAGTTTG 1831

354-5\_L6 AATCTGCCCTTTCGAAAGATCCCAACGAAAAGAGAGACCACATGGTCCTTCTTGAGTTTG 1831

354-5\_L8 AATCTGCCCTTTCGAAAGATCCCAACGAAAAGAGAGACCACATGGTCCTTCTTGAGTTTG 1831

347-10\_R5 AATCTGCCCTTTCGAAAGATCCCAACGAAAAGAGAGACCACATGGTCCTTCTTGAGTTTG 679

347-10\_R6 AATCTGCCCTTTCGAAAGATCCCAACGAAAAGAGAGACCACATGGTCCTTCTTGAGTTTG 678

347-10\_R7 AATCTGCCCTTTCGAAAGATCCCAACGAAAAGAGAGACCACATGGTCCTTCTTGAGTTTG 678

354-3\_R1 AATCTGCCCTTTCGAAAGATCCCAACGAAAAGAGAGACCACATGGTCCTTCTTGAGTTTG 679

354-3\_R2 AATCTGCCCTTTCGAAAGATCCCAACGAAAAGAGAGACCACATGGTCCTTCTTGAGTTTG 679

354-3\_R10 AATCTGCCCTTTCGAAAGATCCCAACGAAAAGAGAGACCACATGGTCCTTCTTGAGTTTG 679

354-5\_R9 AATCTGCCCTTTCGAAAGATCCCAACGAAAAGAGAGACCACATGGTCCTTCTTGAGTTTG 679

354-5\_R11 AATCTGCCCTTTCGAAAGATCCCAACGAAAAGAGAGACCACATGGTCCTTCTTGAGTTTG 678

354-5\_R12 AATCTGCCCTTTCGAAAGATCCCAACGAAAAGAGAGACCACATGGTCCTTCTTGAGTTTG 679

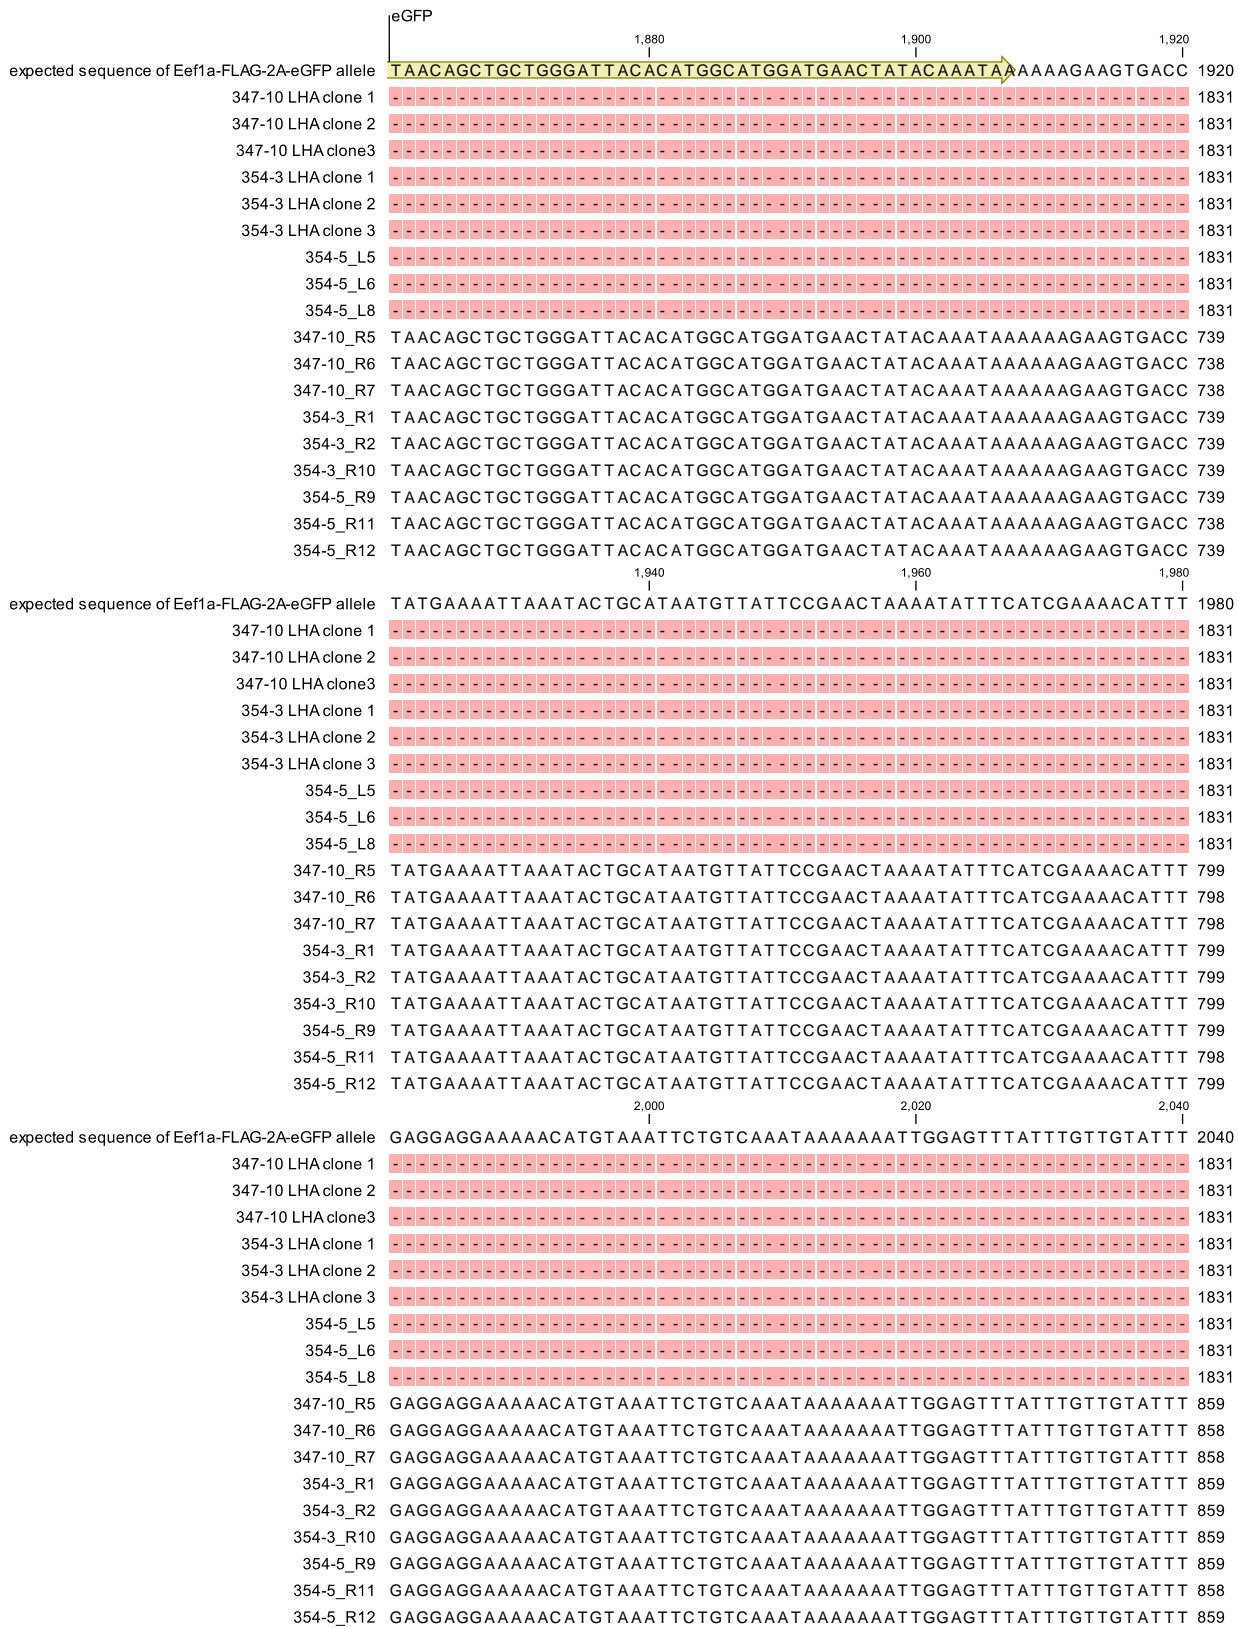

Figure S5 - Page  
 12

expected sequence of Eef1a-FLAG-2A-eGFP allele TTTTCACTAAATTAGTGTGGGCAGTGAATTCCATTTAGCTGATTAATAATTCATTTTGCGG 2100  
 347-10 LHA clone 1 [redacted] 1831  
 347-10 LHA clone 2 [redacted] 1831  
 347-10 LHA clone3 [redacted] 1831  
 354-3 LHA clone 1 [redacted] 1831  
 354-3 LHA clone 2 [redacted] 1831  
 354-3 LHA clone 3 [redacted] 1831  
 354-5\_L5 [redacted] 1831  
 354-5\_L6 [redacted] 1831  
 354-5\_L8 [redacted] 1831  
 347-10\_R5 TTTTCACTAAATTAGTGTGGGCAGTGAATTCCATTTAGCTGATTAATAATTCATTTTGCGG 919  
 347-10\_R6 TTTTCACTAAATTAGTGTGGGCAGTGAATTCCATTTAGCTGATTAATAATTCATTTTGCGG 918  
 347-10\_R7 TTTTCACTAAATTAGTGTGGGCAGTGAATTCCATTTAGCTGATTAATAATTCATTTTGCGG 918  
 354-3\_R1 TTTTCACTAAATTAGTGTGGGCAGTGAATTCCATTTAGCTGATTAATAATTCATTTTGCGG 919  
 354-3\_R2 TTTTCACTAAATTAGTGTGGGCAGTGAATTCCATTTAGCTGATTAATAATTCATTTTGCGG 919  
 354-3\_R10 TTTTCACTAAATTAGTGTGGGCAGTGAATTCCATTTAGCTGATTAATAATTCATTTTGCGG 919  
 354-5\_R9 TTTTCACTAAATTAGTGTGGGCAGTGAATTCCATTTAGCTGATTAATAATTCATTTTGCGG 919  
 354-5\_R11 TTTTCACTAAATTAGTGTGGGCAGTGAATTCCATTTAGCTGATTAATAATTCATTTTGCGG 918  
 354-5\_R12 TTTTCACTAAATTAGTGTGGGCAGTGAATTCCATTTAGCTGATTAATAATTCATTTTGCGG 919

expected sequence of Eef1a-FLAG-2A-eGFP allele C TAAATATTGTCCCGATTTGCGGTCACCAATTAATAGTGCGACCTTACAGAAAAATTTTC 2160  
 347-10 LHA clone 1 [redacted] 1831  
 347-10 LHA clone 2 [redacted] 1831  
 347-10 LHA clone3 [redacted] 1831  
 354-3 LHA clone 1 [redacted] 1831  
 354-3 LHA clone 2 [redacted] 1831  
 354-3 LHA clone 3 [redacted] 1831  
 354-5\_L5 [redacted] 1831  
 354-5\_L6 [redacted] 1831  
 354-5\_L8 [redacted] 1831  
 347-10\_R5 C TAAATATTGTCCCGATTTGCGGTCACCAATTAATAGTGCGACCTTACAGAAAAATTTTC 979  
 347-10\_R6 C TAAATATTGTCCCGATTTGCGGTCACCAATTAATAGTGCGACCTTACAGAAAAATTTTC 978  
 347-10\_R7 C TAAATATTGTCCCGATTTGCGGTCACCAATTAATAGTGCGACCTTACAGAAAAATTTTC 978  
 354-3\_R1 C TAAATATTGTCCCGATTTGCGGTCACCAATTAATAGTGCGACCTTACAGAAAAATTTTC 979  
 354-3\_R2 C TAAATATTGTCCCGATTTGCGGTCACCAATTAATAGTGCGACCTTACAGAAAAATTTTC 979  
 354-3\_R10 C TAAATATTGTCCCGATTTGCGGTCACCAATTAATAGTGCGACCTTACAGAAAAATTTTC 979  
 354-5\_R9 C TAAATATTGTCCCGATTTGCGGTCACCAATTAATAGTGCGACCTTACAGAAAAATTTTC 979  
 354-5\_R11 C TAAATATTGTCCCGATTTGCGGTCACCAATTAATAGTGCGACCTTACAGAAAAATTTTC 978  
 354-5\_R12 C TAAATATTGTCCCGATTTGCGGTCACCAATTAATAGTGCGACCTTACAGAAAAATTTTC 979

expected sequence of Eef1a-FLAG-2A-eGFP allele TGTCGCGCTAAATTGCAAAATGCACCTGGATAAAAAAGCGCGAAGAAAATAAAGCGG AATT 2220  
 347-10 LHA clone 1 [redacted] 1831  
 347-10 LHA clone 2 [redacted] 1831  
 347-10 LHA clone3 [redacted] 1831  
 354-3 LHA clone 1 [redacted] 1831  
 354-3 LHA clone 2 [redacted] 1831  
 354-3 LHA clone 3 [redacted] 1831  
 354-5\_L5 [redacted] 1831  
 354-5\_L6 [redacted] 1831  
 354-5\_L8 [redacted] 1831  
 347-10\_R5 TGTCGCGCTAAATTGCAAAATGCACCTGGATAAAAAAGCGCGAAGAAAATAAAGCGG - - - 1035  
 347-10\_R6 TGTCGCGCTAAATTGCAAAATGCACCTGGATAAAAAAGCGCGAAGAAAATAAAGCGG - - - 1034  
 347-10\_R7 TGTCGCGCTAAATTGCAAAATGCACCTGGATAAAAAAGCGCGAAGAAAATAAAGCGG - - - 1034  
 354-3\_R1 TGTCGCGCTAAATTGCAAAATGCACCTGGATAAAAAAGCGCGAAGAAAATAAAGCGG - - - 1035  
 354-3\_R2 TGTCGCGCTAAATTGCAAAATGCACCTGGATAAAAAAGCGCGAAGAAAATAAAGCGG - - - 1035  
 354-3\_R10 TGTCGCGCTAAATTGCAAAATGCACCTGGATAAAAAAGCGCGAAGAAAATAAAGCGG - - - 1035  
 354-5\_R9 TGTCGCGCTAAATTGCAAAATGCACCTGGATAAAAAAGCGCGAAGAAAATAAAGCGG - - - 1035  
 354-5\_R11 TGTCGCGCTAAATTGCAAAATGCACCTGGATAAAAAAGCGCGAAGAAAATAAAGCGG - - - 1034  
 354-5\_R12 TGTCGCGCTAAATTGCAAAATGCACCTGGATAAAAAAGCGCGAAGAAAATAAAGCGG - - - 1035

|                                                |                                                                |       |       |      |
|------------------------------------------------|----------------------------------------------------------------|-------|-------|------|
|                                                | 2,240                                                          | 2,260 | 2,280 |      |
| expected sequence of Eef1a-FLAG-2A-eGFP allele | AATGTTT GCGAGTGTACTTTCGTATTCGCCCGAAGGTGTTCTATAAAATTTAACTAAGCCT |       |       | 2280 |
| 347-10 LHA clone 1                             | .....                                                          |       |       | 1831 |
| 347-10 LHA clone 2                             | .....                                                          |       |       | 1831 |
| 347-10 LHA clone3                              | .....                                                          |       |       | 1831 |
| 354-3 LHA clone 1                              | .....                                                          |       |       | 1831 |
| 354-3 LHA clone 2                              | .....                                                          |       |       | 1831 |
| 354-3 LHA clone 3                              | .....                                                          |       |       | 1831 |
| 354-5_L5                                       | .....                                                          |       |       | 1831 |
| 354-5_L6                                       | .....                                                          |       |       | 1831 |
| 354-5_L8                                       | .....                                                          |       |       | 1831 |
| 347-10_R5                                      | .....                                                          |       |       | 1035 |
| 347-10_R6                                      | .....                                                          |       |       | 1034 |
| 347-10_R7                                      | .....                                                          |       |       | 1034 |
| 354-3_R1                                       | .....                                                          |       |       | 1035 |
| 354-3_R2                                       | .....                                                          |       |       | 1035 |
| 354-3_R10                                      | .....                                                          |       |       | 1035 |
| 354-5_R9                                       | .....                                                          |       |       | 1035 |
| 354-5_R11                                      | .....                                                          |       |       | 1034 |
| 354-5_R12                                      | .....                                                          |       |       | 1035 |
|                                                | 2,300                                                          | 2,320 | 2,340 |      |
| expected sequence of Eef1a-FLAG-2A-eGFP allele | TTTTTAAACAAAAACAGACGATATCAATCTTCTTGCATGATACAAAAAATTTAAGCTTA    |       |       | 2340 |
| 347-10 LHA clone 1                             | .....                                                          |       |       | 1831 |
| 347-10 LHA clone 2                             | .....                                                          |       |       | 1831 |
| 347-10 LHA clone3                              | .....                                                          |       |       | 1831 |
| 354-3 LHA clone 1                              | .....                                                          |       |       | 1831 |
| 354-3 LHA clone 2                              | .....                                                          |       |       | 1831 |
| 354-3 LHA clone 3                              | .....                                                          |       |       | 1831 |
| 354-5_L5                                       | .....                                                          |       |       | 1831 |
| 354-5_L6                                       | .....                                                          |       |       | 1831 |
| 354-5_L8                                       | .....                                                          |       |       | 1831 |
| 347-10_R5                                      | .....                                                          |       |       | 1035 |
| 347-10_R6                                      | .....                                                          |       |       | 1034 |
| 347-10_R7                                      | .....                                                          |       |       | 1034 |
| 354-3_R1                                       | .....                                                          |       |       | 1035 |
| 354-3_R2                                       | .....                                                          |       |       | 1035 |
| 354-3_R10                                      | .....                                                          |       |       | 1035 |
| 354-5_R9                                       | .....                                                          |       |       | 1035 |
| 354-5_R11                                      | .....                                                          |       |       | 1034 |
| 354-5_R12                                      | .....                                                          |       |       | 1035 |
|                                                | 2,360                                                          | 2,380 | 2,400 |      |
| expected sequence of Eef1a-FLAG-2A-eGFP allele | GTGTAAATATGGCTTAATGTTTTTAAGTTCGAGTATTTTCAAGTCATTAACGGTGTTTT    |       |       | 2400 |
| 347-10 LHA clone 1                             | .....                                                          |       |       | 1831 |
| 347-10 LHA clone 2                             | .....                                                          |       |       | 1831 |
| 347-10 LHA clone3                              | .....                                                          |       |       | 1831 |
| 354-3 LHA clone 1                              | .....                                                          |       |       | 1831 |
| 354-3 LHA clone 2                              | .....                                                          |       |       | 1831 |
| 354-3 LHA clone 3                              | .....                                                          |       |       | 1831 |
| 354-5_L5                                       | .....                                                          |       |       | 1831 |
| 354-5_L6                                       | .....                                                          |       |       | 1831 |
| 354-5_L8                                       | .....                                                          |       |       | 1831 |
| 347-10_R5                                      | .....                                                          |       |       | 1035 |
| 347-10_R6                                      | .....                                                          |       |       | 1034 |
| 347-10_R7                                      | .....                                                          |       |       | 1034 |
| 354-3_R1                                       | .....                                                          |       |       | 1035 |
| 354-3_R2                                       | .....                                                          |       |       | 1035 |
| 354-3_R10                                      | .....                                                          |       |       | 1035 |
| 354-5_R9                                       | .....                                                          |       |       | 1035 |
| 354-5_R11                                      | .....                                                          |       |       | 1034 |
| 354-5_R12                                      | .....                                                          |       |       | 1035 |

|                                                |                                                               |       |       |      |
|------------------------------------------------|---------------------------------------------------------------|-------|-------|------|
|                                                | 2,420                                                         | 2,440 | 2,460 |      |
| expected sequence of Eef1a-FLAG-2A-eGFP allele | ACTATGTGAATATCAACTGTTTGGCTCACACAATTATCTTCAGTAATAATTTTTACTGCTT |       |       | 2460 |
| 347-10 LHA clone 1                             | -----                                                         |       |       | 1831 |
| 347-10 LHA clone 2                             | -----                                                         |       |       | 1831 |
| 347-10 LHA clone3                              | -----                                                         |       |       | 1831 |
| 354-3 LHA clone 1                              | -----                                                         |       |       | 1831 |
| 354-3 LHA clone 2                              | -----                                                         |       |       | 1831 |
| 354-3 LHA clone 3                              | -----                                                         |       |       | 1831 |
| 354-5_L5                                       | -----                                                         |       |       | 1831 |
| 354-5_L6                                       | -----                                                         |       |       | 1831 |
| 354-5_L8                                       | -----                                                         |       |       | 1831 |
| 347-10_R5                                      | -----                                                         |       |       | 1035 |
| 347-10_R6                                      | -----                                                         |       |       | 1034 |
| 347-10_R7                                      | -----                                                         |       |       | 1034 |
| 354-3_R1                                       | -----                                                         |       |       | 1035 |
| 354-3_R2                                       | -----                                                         |       |       | 1035 |
| 354-3_R10                                      | -----                                                         |       |       | 1035 |
| 354-5_R9                                       | -----                                                         |       |       | 1035 |
| 354-5_R11                                      | -----                                                         |       |       | 1034 |
| 354-5_R12                                      | -----                                                         |       |       | 1035 |
|                                                | 2,480                                                         | 2,500 | 2,520 |      |
| expected sequence of Eef1a-FLAG-2A-eGFP allele | AATTATGTTTAAAGTTGATGATGATTGCGGTACCGTGTTTGAGTAGCACATCTTGTCTAAT |       |       | 2520 |
| 347-10 LHA clone 1                             | -----                                                         |       |       | 1831 |
| 347-10 LHA clone 2                             | -----                                                         |       |       | 1831 |
| 347-10 LHA clone3                              | -----                                                         |       |       | 1831 |
| 354-3 LHA clone 1                              | -----                                                         |       |       | 1831 |
| 354-3 LHA clone 2                              | -----                                                         |       |       | 1831 |
| 354-3 LHA clone 3                              | -----                                                         |       |       | 1831 |
| 354-5_L5                                       | -----                                                         |       |       | 1831 |
| 354-5_L6                                       | -----                                                         |       |       | 1831 |
| 354-5_L8                                       | -----                                                         |       |       | 1831 |
| 347-10_R5                                      | -----                                                         |       |       | 1035 |
| 347-10_R6                                      | -----                                                         |       |       | 1034 |
| 347-10_R7                                      | -----                                                         |       |       | 1034 |
| 354-3_R1                                       | -----                                                         |       |       | 1035 |
| 354-3_R2                                       | -----                                                         |       |       | 1035 |
| 354-3_R10                                      | -----                                                         |       |       | 1035 |
| 354-5_R9                                       | -----                                                         |       |       | 1035 |
| 354-5_R11                                      | -----                                                         |       |       | 1034 |
| 354-5_R12                                      | -----                                                         |       |       | 1035 |
|                                                | 2,540                                                         | 2,560 | 2,580 |      |
| expected sequence of Eef1a-FLAG-2A-eGFP allele | AACAGATACCATTTCCTAATTGATGGTAGGCATGCTACCGAACATCAAAACGTTGCTCAC  |       |       | 2580 |
| 347-10 LHA clone 1                             | -----                                                         |       |       | 1831 |
| 347-10 LHA clone 2                             | -----                                                         |       |       | 1831 |
| 347-10 LHA clone3                              | -----                                                         |       |       | 1831 |
| 354-3 LHA clone 1                              | -----                                                         |       |       | 1831 |
| 354-3 LHA clone 2                              | -----                                                         |       |       | 1831 |
| 354-3 LHA clone 3                              | -----                                                         |       |       | 1831 |
| 354-5_L5                                       | -----                                                         |       |       | 1831 |
| 354-5_L6                                       | -----                                                         |       |       | 1831 |
| 354-5_L8                                       | -----                                                         |       |       | 1831 |
| 347-10_R5                                      | -----                                                         |       |       | 1035 |
| 347-10_R6                                      | -----                                                         |       |       | 1034 |
| 347-10_R7                                      | -----                                                         |       |       | 1034 |
| 354-3_R1                                       | -----                                                         |       |       | 1035 |
| 354-3_R2                                       | -----                                                         |       |       | 1035 |
| 354-3_R10                                      | -----                                                         |       |       | 1035 |
| 354-5_R9                                       | -----                                                         |       |       | 1035 |
| 354-5_R11                                      | -----                                                         |       |       | 1034 |
| 354-5_R12                                      | -----                                                         |       |       | 1035 |

|                                                |                                                               |       |       |      |
|------------------------------------------------|---------------------------------------------------------------|-------|-------|------|
|                                                | 2,600                                                         | 2,620 | 2,640 |      |
| expected sequence of Eef1a-FLAG-2A-eGFP allele | ACGTCGGTTATCCAGTTACAAGGCAAGATGTAATAATCGGCCACGGTATTTTCGGTATCCA |       |       | 2640 |
| 347-10 LHA clone 1                             | -----                                                         |       |       | 1831 |
| 347-10 LHA clone 2                             | -----                                                         |       |       | 1831 |
| 347-10 LHA clone3                              | -----                                                         |       |       | 1831 |
| 354-3 LHA clone 1                              | -----                                                         |       |       | 1831 |
| 354-3 LHA clone 2                              | -----                                                         |       |       | 1831 |
| 354-3 LHA clone 3                              | -----                                                         |       |       | 1831 |
| 354-5_L5                                       | -----                                                         |       |       | 1831 |
| 354-5_L6                                       | -----                                                         |       |       | 1831 |
| 354-5_L8                                       | -----                                                         |       |       | 1831 |
| 347-10_R5                                      | -----                                                         |       |       | 1035 |
| 347-10_R6                                      | -----                                                         |       |       | 1034 |
| 347-10_R7                                      | -----                                                         |       |       | 1034 |
| 354-3_R1                                       | -----                                                         |       |       | 1035 |
| 354-3_R2                                       | -----                                                         |       |       | 1035 |
| 354-3_R10                                      | -----                                                         |       |       | 1035 |
| 354-5_R9                                       | -----                                                         |       |       | 1035 |
| 354-5_R11                                      | -----                                                         |       |       | 1034 |
| 354-5_R12                                      | -----                                                         |       |       | 1035 |
|                                                | 2,660                                                         | 2,680 | 2,700 |      |
| expected sequence of Eef1a-FLAG-2A-eGFP allele | AGAATAAAACGTTGTGTGATTGCGTATATTAGCGAACATGTGCAACAAGATGTTAAAAACA |       |       | 2700 |
| 347-10 LHA clone 1                             | -----                                                         |       |       | 1831 |
| 347-10 LHA clone 2                             | -----                                                         |       |       | 1831 |
| 347-10 LHA clone3                              | -----                                                         |       |       | 1831 |
| 354-3 LHA clone 1                              | -----                                                         |       |       | 1831 |
| 354-3 LHA clone 2                              | -----                                                         |       |       | 1831 |
| 354-3 LHA clone 3                              | -----                                                         |       |       | 1831 |
| 354-5_L5                                       | -----                                                         |       |       | 1831 |
| 354-5_L6                                       | -----                                                         |       |       | 1831 |
| 354-5_L8                                       | -----                                                         |       |       | 1831 |
| 347-10_R5                                      | -----                                                         |       |       | 1035 |
| 347-10_R6                                      | -----                                                         |       |       | 1034 |
| 347-10_R7                                      | -----                                                         |       |       | 1034 |
| 354-3_R1                                       | -----                                                         |       |       | 1035 |
| 354-3_R2                                       | -----                                                         |       |       | 1035 |
| 354-3_R10                                      | -----                                                         |       |       | 1035 |
| 354-5_R9                                       | -----                                                         |       |       | 1035 |
| 354-5_R11                                      | -----                                                         |       |       | 1034 |
| 354-5_R12                                      | -----                                                         |       |       | 1035 |
|                                                | 2,720                                                         | 2,740 | 2,760 |      |
| expected sequence of Eef1a-FLAG-2A-eGFP allele | CCTGTTAACTAATAGTCGTTACCATAGTGACTAATATTAATGCAAAATGTAAAAGAATTCC |       |       | 2760 |
| 347-10 LHA clone 1                             | -----                                                         |       |       | 1831 |
| 347-10 LHA clone 2                             | -----                                                         |       |       | 1831 |
| 347-10 LHA clone3                              | -----                                                         |       |       | 1831 |
| 354-3 LHA clone 1                              | -----                                                         |       |       | 1831 |
| 354-3 LHA clone 2                              | -----                                                         |       |       | 1831 |
| 354-3 LHA clone 3                              | -----                                                         |       |       | 1831 |
| 354-5_L5                                       | -----                                                         |       |       | 1831 |
| 354-5_L6                                       | -----                                                         |       |       | 1831 |
| 354-5_L8                                       | -----                                                         |       |       | 1831 |
| 347-10_R5                                      | -----                                                         |       |       | 1035 |
| 347-10_R6                                      | -----                                                         |       |       | 1034 |
| 347-10_R7                                      | -----                                                         |       |       | 1034 |
| 354-3_R1                                       | -----                                                         |       |       | 1035 |
| 354-3_R2                                       | -----                                                         |       |       | 1035 |
| 354-3_R10                                      | -----                                                         |       |       | 1035 |
| 354-5_R9                                       | -----                                                         |       |       | 1035 |
| 354-5_R11                                      | -----                                                         |       |       | 1034 |
| 354-5_R12                                      | -----                                                         |       |       | 1035 |



|                                                |                                                                      |       |  |       |  |       |      |
|------------------------------------------------|----------------------------------------------------------------------|-------|--|-------|--|-------|------|
|                                                |                                                                      | 2,780 |  | 2,800 |  | 2,820 |      |
| expected sequence of Eef1a-FLAG-2A-eGFP allele | <b>GTAAAAAACTTTCAAAGTTCATTTTTAGGAGAGTTATTTGACAAAAACATAATTTTTGCAA</b> |       |  |       |  |       | 2820 |
| 347-10 LHA clone 1                             | .....                                                                |       |  |       |  |       | 1831 |
| 347-10 LHA clone 2                             | .....                                                                |       |  |       |  |       | 1831 |
| 347-10 LHA clone3                              | .....                                                                |       |  |       |  |       | 1831 |
| 354-3 LHA clone 1                              | .....                                                                |       |  |       |  |       | 1831 |
| 354-3 LHA clone 2                              | .....                                                                |       |  |       |  |       | 1831 |
| 354-3 LHA clone 3                              | .....                                                                |       |  |       |  |       | 1831 |
| 354-5_L5                                       | .....                                                                |       |  |       |  |       | 1831 |
| 354-5_L6                                       | .....                                                                |       |  |       |  |       | 1831 |
| 354-5_L8                                       | .....                                                                |       |  |       |  |       | 1831 |
| 347-10_R5                                      | .....                                                                |       |  |       |  |       | 1035 |
| 347-10_R6                                      | .....                                                                |       |  |       |  |       | 1034 |
| 347-10_R7                                      | .....                                                                |       |  |       |  |       | 1034 |
| 354-3_R1                                       | .....                                                                |       |  |       |  |       | 1035 |
| 354-3_R2                                       | .....                                                                |       |  |       |  |       | 1035 |
| 354-3_R10                                      | .....                                                                |       |  |       |  |       | 1035 |
| 354-5_R9                                       | .....                                                                |       |  |       |  |       | 1035 |
| 354-5_R11                                      | .....                                                                |       |  |       |  |       | 1034 |
| 354-5_R12                                      | .....                                                                |       |  |       |  |       | 1035 |
|                                                |                                                                      | 2,840 |  | 2,860 |  | 2,880 |      |
| expected sequence of Eef1a-FLAG-2A-eGFP allele | <b>TTAATTATTCTTACGCTTCATTGAAGATCATACTTAATAATTTTTTTAATAGTAATTATT</b>  |       |  |       |  |       | 2880 |
| 347-10 LHA clone 1                             | .....                                                                |       |  |       |  |       | 1831 |
| 347-10 LHA clone 2                             | .....                                                                |       |  |       |  |       | 1831 |
| 347-10 LHA clone3                              | .....                                                                |       |  |       |  |       | 1831 |
| 354-3 LHA clone 1                              | .....                                                                |       |  |       |  |       | 1831 |
| 354-3 LHA clone 2                              | .....                                                                |       |  |       |  |       | 1831 |
| 354-3 LHA clone 3                              | .....                                                                |       |  |       |  |       | 1831 |
| 354-5_L5                                       | .....                                                                |       |  |       |  |       | 1831 |
| 354-5_L6                                       | .....                                                                |       |  |       |  |       | 1831 |
| 354-5_L8                                       | .....                                                                |       |  |       |  |       | 1831 |
| 347-10_R5                                      | .....                                                                |       |  |       |  |       | 1035 |
| 347-10_R6                                      | .....                                                                |       |  |       |  |       | 1034 |
| 347-10_R7                                      | .....                                                                |       |  |       |  |       | 1034 |
| 354-3_R1                                       | .....                                                                |       |  |       |  |       | 1035 |
| 354-3_R2                                       | .....                                                                |       |  |       |  |       | 1035 |
| 354-3_R10                                      | .....                                                                |       |  |       |  |       | 1035 |
| 354-5_R9                                       | .....                                                                |       |  |       |  |       | 1035 |
| 354-5_R11                                      | .....                                                                |       |  |       |  |       | 1034 |
| 354-5_R12                                      | .....                                                                |       |  |       |  |       | 1035 |
|                                                |                                                                      | 2,900 |  | 2,920 |  | 2,940 |      |
| expected sequence of Eef1a-FLAG-2A-eGFP allele | <b>AGTTATTCTTGAAAATTGGTGTGGACACTCAAACGCGTGAATGCCCTCTATTTTTGC</b>     |       |  |       |  |       | 2940 |
| 347-10 LHA clone 1                             | .....                                                                |       |  |       |  |       | 1831 |
| 347-10 LHA clone 2                             | .....                                                                |       |  |       |  |       | 1831 |
| 347-10 LHA clone3                              | .....                                                                |       |  |       |  |       | 1831 |
| 354-3 LHA clone 1                              | .....                                                                |       |  |       |  |       | 1831 |
| 354-3 LHA clone 2                              | .....                                                                |       |  |       |  |       | 1831 |
| 354-3 LHA clone 3                              | .....                                                                |       |  |       |  |       | 1831 |
| 354-5_L5                                       | .....                                                                |       |  |       |  |       | 1831 |
| 354-5_L6                                       | .....                                                                |       |  |       |  |       | 1831 |
| 354-5_L8                                       | .....                                                                |       |  |       |  |       | 1831 |
| 347-10_R5                                      | .....                                                                |       |  |       |  |       | 1077 |
| 347-10_R6                                      | .....                                                                |       |  |       |  |       | 1076 |
| 347-10_R7                                      | .....                                                                |       |  |       |  |       | 1076 |
| 354-3_R1                                       | .....                                                                |       |  |       |  |       | 1077 |
| 354-3_R2                                       | .....                                                                |       |  |       |  |       | 1077 |
| 354-3_R10                                      | .....                                                                |       |  |       |  |       | 1077 |
| 354-5_R9                                       | .....                                                                |       |  |       |  |       | 1077 |
| 354-5_R11                                      | .....                                                                |       |  |       |  |       | 1076 |
| 354-5_R12                                      | .....                                                                |       |  |       |  |       | 1077 |

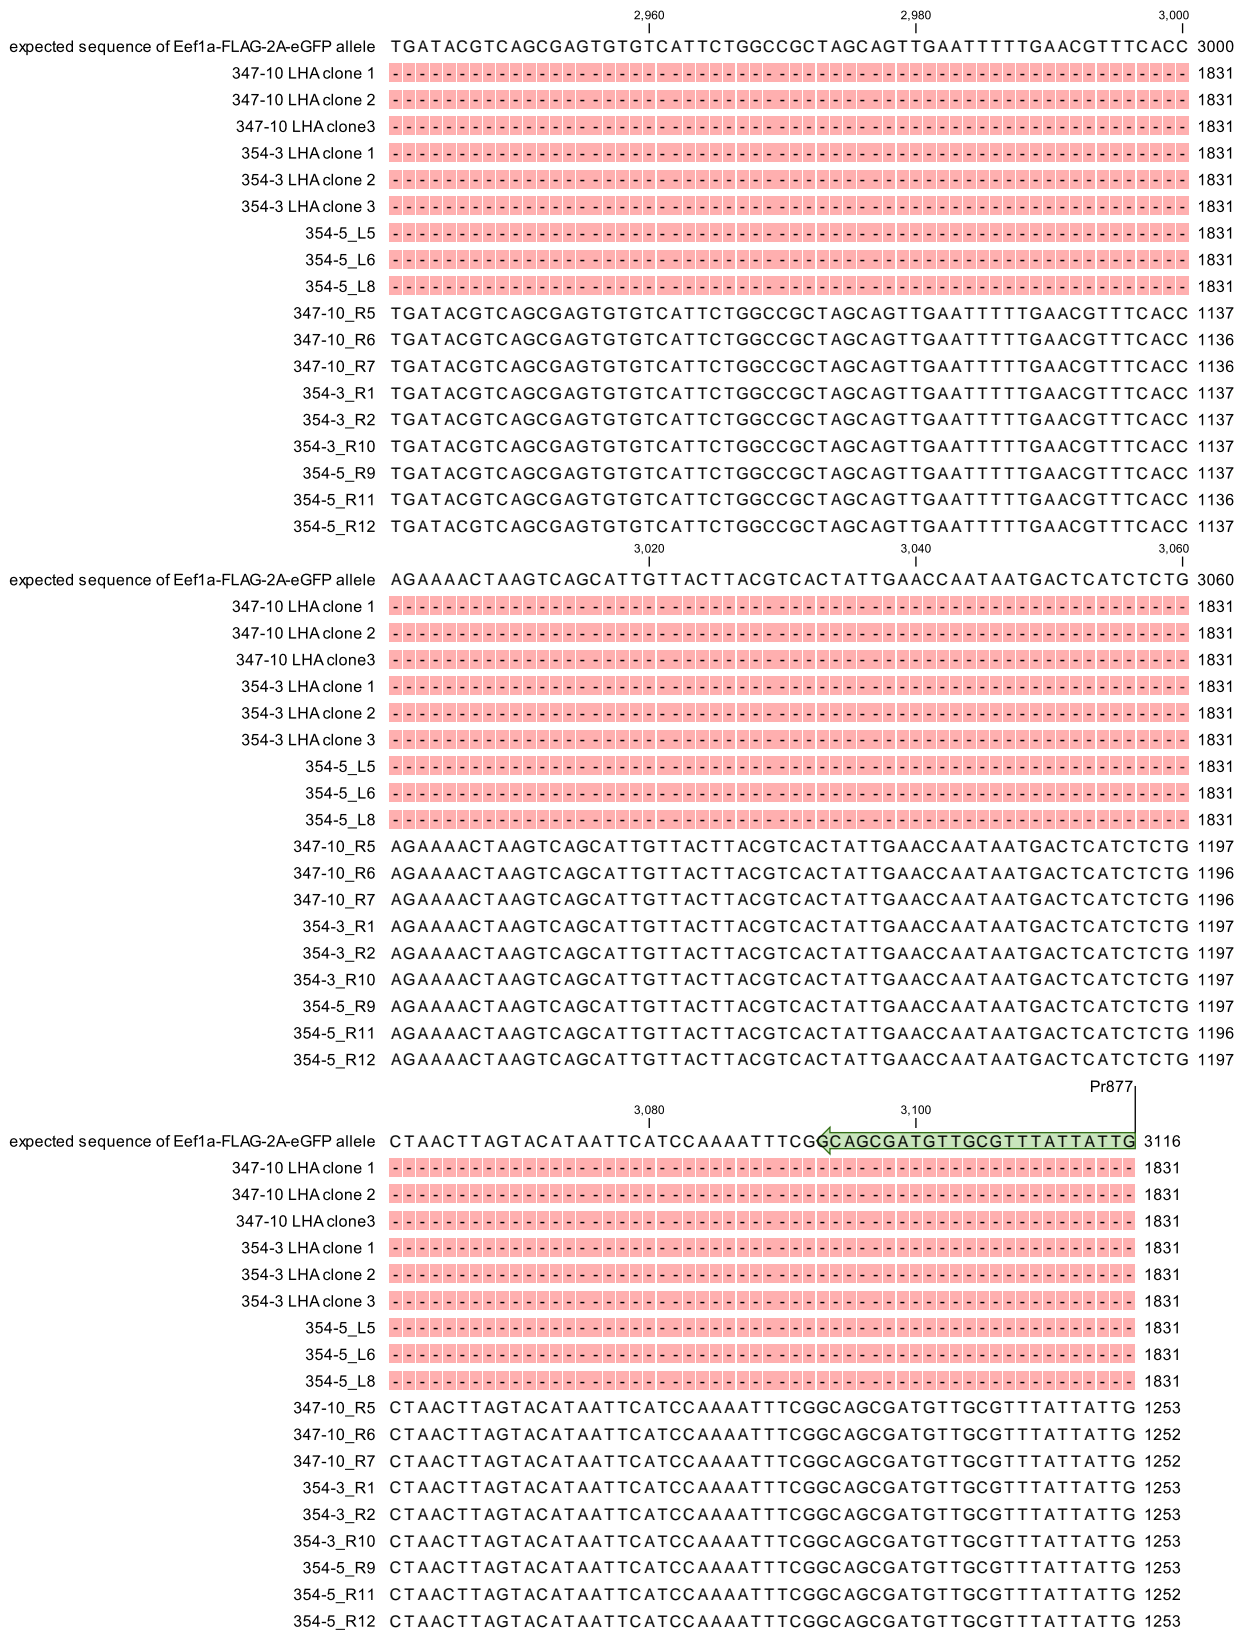

**S5 Fig. Alignment of upstream and downstream integration sites from *Eef1a*<sup>FLAG-P2A-eGFP</sup> colonies.**

Nucleotide alignment of the regions encoding the up- and downstream integration sites from the founder colony, 347-10, and two transgenic offspring, 354-3 and 354-5. Three cloned amplicons were sequenced for each animal at each site. Primer binding sites are indicated in green on the expected sequence. Differences are highlighted in red boxes. Note that the regions that do not overlap between the upstream and downstream sequences are shown as gaps at the beginning and end of the alignment.
