# Supplementary material for: CRISPR/Cas9-mediated gene knockin in the hydroid Hydractinia symbiolongicarpus
Source: PubMed Central journal article supplement (PMC6122657; doi:10.1186/s12864-018-5032-z), 2018-09-03
Supplement: 12864_2018_5032_MOESM19_ESM.pdf [file 12864_2018_5032_MOESM19_ESM.pdf]

Pr845

```

expected_sequence_EF1a-SF-P2A-tdTom GTAGAAACTGGTGTATTGTCCCTGGTATGATCGTTACATTTGCCCTGCCAATGTAACC 60
350-10_c2 GTAGAAACTGGTGTATTGTCCCTGGTATGATCGTTACATTTGCCCTGCCAATGTAACC 60
350-10_c3 GTAGAAACTGGTGTATTGTCCCTGGTATGATCGTTACATTTGCCCTGCCAATGTAACC 60
350-10_c5 GTAGAAACTGGTGTATTGTCCCTGGTATGATCGTTACATTTGCCCTGCCAATGTAACC 60
355-8_c11 GTAGAAACTGGTGTATTGTCCCTGGTATGATCGTTACATTTGCCCTGCCAATGTAACC 60
355-8_c13 GTAGAAACTGGTGTATTGTCCCTGGTATGATCGTTACATTTGCCCTGCCAATGTAACC 60
355-8_c14 GTAGAAACTGGTGTATTGTCCCTGGTATGATCGTTACATTTGCCCTGCCAATGTAACC 60

expected_sequence_EF1a-SF-P2A-tdTom ACTGAGGTCAAATCTGTAGAAATGCACCACGAATCCTTAACTGAAGCACATCCAGGTGAT 120
350-10_c2 ACTGAGGTCAAATCTGTAGAAATGCACCACGAATCCTTAACTGAAGCACATCCAGGTGAT 120
350-10_c3 ACTGAGGTCAAATCTGTAGAAATGCACCACGAATCCTTAACTGAAGCACATCCAGGTGAT 120
350-10_c5 ACTGAGGTCAAATCTGTAGAAATGCACCACGAATCCTTAACTGAAGCACATCCAGGTGAT 120
355-8_c11 ACTGAGGTCAAATCTGTAGAAATGCACCACGAATCCTTAACTGAAGCACATCCAGGTGAT 120
355-8_c13 ACTGAGGTCAAATCTGTAGAAATGCACCACGAATCCTTAACTGAAGCACATCCAGGTGAT 120
355-8_c14 ACTGAGGTCAAATCTGTAGAAATGCACCACGAATCCTTAACTGAAGCACATCCAGGTGAT 120

expected_sequence_EF1a-SF-P2A-tdTom AATGTTGGTTTTAATGTCAAAAAATGTGTCTATCAAGGATATCAAACGTGGTATGGTTGCG 180
350-10_c2 AATGTTGGTTTTAATGTCAAAAAATGTGTCTATCAAGGATATCAAACGTGGTATGGTTGCG 180
350-10_c3 AATGTTGGTTTTAATGTCAAAAAATGTGTCTATCAAGGATATCAAACGTGGTATGGTTGCG 180
350-10_c5 AATGTTGGTTTTAATGTCAAAAAATGTGTCTATCAAGGATATCAAACGTGGTATGGTTGCG 180
355-8_c11 AATGTTGGTTTTAATGTCAAAAAATGTGTCTATCAAGGATATCAAACGTGGTATGGTTGCG 180
355-8_c13 AATGTTGGTTTTAATGTCAAAAAATGTGTCTATCAAGGATATCAAACGTGGTATGGTTGCG 180
355-8_c14 AATGTTGGTTTTAATGTCAAAAAATGTGTCTATCAAGGATATCAAACGTGGTATGGTTGCG 180

expected_sequence_EF1a-SF-P2A-tdTom TCTGACAGCAAAAATGATCCAGCCAAGAAGCCAAAACCTTTTATGCACAGGTATTCTTT 240
350-10_c2 TCTGACAGCAAAAATGATCCAGCCAAGAAGCCAAAACCTTTTATGCACAGGTATTCTTT 240
350-10_c3 TCTGACAGCAAAAATGATCCAGCCAAGAAGCCAAAACCTTTTATGCACAGGTATTCTTT 240
350-10_c5 TCTGACAGCAAAAATGATCCAGCCAAGAAGCCAAAACCTTTTATGCACAGGTATTCTTT 240
355-8_c11 TCTGACAGCAAAAATGATCCAGCCAAGAAGCCAAAACCTTTTATGCACAGGTATTCTTT 240
355-8_c13 TCTGACAGCAAAAATGATCCAGCCAAGAAGCCAAAACCTTTTATGCACAGGTATTCTTT 240
355-8_c14 TCTGACAGCAAAAATGATCCAGCCAAGAAGCCAAAACCTTTTATGCACAGGTATTCTTT 240

expected_sequence_EF1a-SF-P2A-tdTom AATTTTTGACTTAACTTATCAGTTTGTATAAAGCGTGTGGCCGTGGCTTGCCACTTGCT 300
350-10_c2 AATTTTTGACTTAACTTATCAGTTTGTATAAAGCGTGTGGCCGTGGCTTGCCACTTGCT 300
350-10_c3 AATTTTTGACTTAACTTATCAGTTTGTATAAAGCGTGTGGCCGTGGCTTGCCACTTGCT 300
350-10_c5 AATTTTTGACTTAACTTATCAGTTTGTATAAAGCGTGTGGCCGTGGCTTGCCACTTGCT 300
355-8_c11 AATTTTTGACTTAACTTATCAGTTTGTATAAAGCGTGTGGCCGTGGCTTGCCACTTGCT 300
355-8_c13 AATTTTTGACTTAACTTATCAGTTTGTATAAAGCGTGTGGCCGTGGCTTGCCACTTGCT 300
355-8_c14 AATTTTTGACTTAACTTATCAGTTTGTATAAAGCGTGTGGCCGTGGCTTGCCACTTGCT 300

expected_sequence_EF1a-SF-P2A-tdTom TAGCATGATAAATCAATCAACTTGACATTCCATCAATTTTGTTCACAGAAACAGGACCT 360
350-10_c2 TAGCATGATAAATCAATCAACTTGACATTCCATCAATTTTGTTCACAGAAACAGGACCT 360
350-10_c3 TAGCATGATAAATCAATCAACTTGACATTCCATCAATTTTGTTCACAGAAACAGGACCT 360
350-10_c5 TAGCATGATAAATCAATCAACTTGACATTCCATCAATTTTGTTCACAGAAACAGGACCT 360
355-8_c11 TAGCATGATAAATCAATCAACTTGACATTCCATCAATTTTGTTCACAGAAACAGGACCT 360
355-8_c13 TAGCATGATAAATCAATCAACTTGACATTCCATCAATTTTGTTCACAGAAACAGGACCT 360
355-8_c14 TAGCATGATAAATCAATCAACTTGACATTCCATCAATTTTGTTCACAGAAACAGGACCT 360

expected_sequence_EF1a-SF-P2A-tdTom T TAAATAGCAAACAAAATATTGAAATAAAAAGTATGATTTTGTCACTATCGTTTATGTG 420
350-10_c2 T TAAATAGCAAACAAAATATTGAAATAAAAAGTATGATTTTGTCACTATCGTTTATGTG 420
350-10_c3 T TAAATAGCAAACAAAATATTGAAATAAAAAGTATGATTTTGTCACTATCGTTTATGTG 420
350-10_c5 T TAAATAGCAAACAAAATATTGAAATAAAAAGTATGATTTTGTCACTATCGTTTATGTG 420
355-8_c11 T TAAATAGCAAACAAAATATTGAAATAAAAAGTATGATTTTGTCACTATCGTTTATGTG 420
355-8_c13 T TAAATAGCAAACAAAATATTGAAATAAAAAGTATGATTTTGTCACTATCGTTTATGTG 420
355-8_c14 T TAAATAGCAAACAAAATATTGAAATAAAAAGTATGATTTTGTCACTATCGTTTATGTG 420

```

```

                                440                               460                               480
expected_sequence_EF1a-SF-P2A-tdTom CCCACCATGAAAAATTTTACAAAGAAGTGGAACTGTTTGAAAGTTCATTAGCAAGAACAAA 480
350-10_c2 CCCACCATGAAAAATTTTACAAAGAAGTGGAACTGTTTGAAAGTTCATTAGCAAGAACAAA 480
350-10_c3 CCCACCATGAAAAATTTTACAAAGAAGTGGAACTGTTTGAAAGTTCATTAGCAAGAACAAA 480
350-10_c5 CCCACCATGAAAAATTTTACAAAGAAGTGGAACTGTTTGAAAGTTCATTAGCAAGAACAAA 480
355-8_c11 CCCACCATGAAAAATTTTACAAAGAAGTGGAACTGTTTGAAAGTTCATTAGCAAGAACAAA 480
355-8_c13 CCCACCATGAAAAATTTTACAAAGAAGTGGAACTGTTTGAAAGTTCATTAGCAAGAACAAA 480
355-8_c14 CCCACCATGAAAAATTTTACAAAGAAGTGGAACTGTTTGAAAGTTCATTAGCAAGAACAAA 480

                                500                               520                               540
expected_sequence_EF1a-SF-P2A-tdTom TCCTAGAAATGTTAGATTTGTGTCAAGAATTTCAAGATTTTTGTTTCTTGCCAAGTTTTT 540
350-10_c2 TCCTAGAAATGTTAGATTTGTGTCAAGAATTTCAAGATTTTTGTTTCTTGCCAAGTTTTT 540
350-10_c3 TCCTAGAAATGTTAGATTTGTGTCAAGAATTTCAAGATTTTTGTTTCTTGCCAAGTTTTT 540
350-10_c5 TCCTAGAAATGTTAGATTTGTGTCAAGAATTTCAAGATTTTTGTTTCTTGCCAAGTTTTT 540
355-8_c11 TCCTAGAAATGTTAGATTTGTGTCAAGAATTTCAAGATTTTTGTTTCTTGCCAAGTTTTT 540
355-8_c13 TCCTAGAAATGTTAGATTTGTGTCAAGAATTTCAAGATTTTTGTTTCTTGCCAAGTTTTT 540
355-8_c14 TCCTAGAAATGTTAGATTTGTGTCAAGAATTTCAAGATTTTTGTTTCTTGCCAAGTTTTT 540

                                560                               580                               600
expected_sequence_EF1a-SF-P2A-tdTom AGCACTTGCTTAGGGAACATTTTAAAATATTAATTTTTATTGAATAAAGAACCAACCTGT 600
350-10_c2 AGCACTTGCTTAGGGAACATTTTAAAATATTAATTTTTATTGAATAAAGAACCAACCTGT 600
350-10_c3 AGCACTTGCTTAGGGAACATTTTAAAATATTAATTTTTATTGAATAAAGAACCAACCTGT 600
350-10_c5 AGCACTTGCTTAGGGAACATTTTAAAATATTAATTTTTATTGAATAAAGAACCAACCTGT 600
355-8_c11 AGCACTTGCTTAGGGAACATTTTAAAATATTAATTTTTATTGAATAAAGAACCAACCTGT 600
355-8_c13 AGCACTTGCTTAGGGAACATTTTAAAATATTAATTTTTATTGAATAAAGAACCAACCTGT 600
355-8_c14 AGCACTTGCTTAGGGAACATTTTAAAATATTAATTTTTATTGAATAAAGAACCAACCTGT 600

                                620                               640                               660
expected_sequence_EF1a-SF-P2A-tdTom TTGACTTTTATTAGTAATAAAGCTAAAATATGGCCTAAATCATAATTTATTATGTGATT 660
350-10_c2 TTGACTTTTATTAGTAATAAAGCTAAAATATGGCCTAAATCATAATTTATTATGTGATT 660
350-10_c3 TTGACTTTTATTAGTAATAAAGCTAAAATATGGCCTAAATCATAATTTATTATGTGATT 660
350-10_c5 TTGACTTTTATTAGTAATAAAGCTAAAATATGGCCTAAATCATAATTTATTATGTGATT 660
355-8_c11 TTGACTTTTATTAGTAATAAAGCTAAAATATGGCCTAAATCATAATTTATTATGTGATT 660
355-8_c13 TTGACTTTTATTAGTAATAAAGCTAAAATATGGCCTAAATCATAATTTATTATGTGATT 660
355-8_c14 TTGACTTTTATTAGTAATAAAGCTAAAATATGGCCTAAATCATAATTTATTATGTGATT 660

                                680                               700                               720
expected_sequence_EF1a-SF-P2A-tdTom TGGGAAAGAAATTTGTGTTGATTTTTCCATTAATATTGTA AAAACAAAATCGAAAGTTAA 720
350-10_c2 TGGGAAAGAAATTTGTGTTGATTTTTCCATTAATATTGTA AAAACAAAATCGAAAGTTAA 720
350-10_c3 TGGGAAAGAAATTTGTGTTGATTTTTCCATTAATATTGTA AAAACAAAATCGAAAGTTAA 720
350-10_c5 TGGGAAAGAAATTTGTGTTGATTTTTCCATTAATATTGTA AAAACAAAATCGAAAGTTAA 720
355-8_c11 TGGGAAAGAAATTTGTGTTGATTTTTCCATTAATATTGTA AAAACAAAATCGAAAGTTAA 720
355-8_c13 TGGGAAAGAAATTTGTGTTGATTTTTCCATTAATATTGTA AAAACAAAATCGAAAGTTAA 720
355-8_c14 TGGGAAAGAAATTTGTGTTGATTTTTCCATTAATATTGTA AAAACAAAATCGAAAGTTAA 720

                                740                               760                               780
expected_sequence_EF1a-SF-P2A-tdTom TTTCTTTCAAAAATTACTTTTAGGTCATCATTCTCAATCATCCAGGTGAGATTCATGCTG 780
350-10_c2 TTTCTTTCAAAAATTACTTTTAGGTCATCATTCTCAATCATCCAGGTGAGATTCATGCTG 780
350-10_c3 TTTCTTTCAAAAATTACTTTTAGGTCATCATTCTCAATCATCCAGGTGAGATTCATGCTG 780
350-10_c5 TTTCTTTCAAAAATTACTTTTAGGTCATCATTCTCAATCATCCAGGTGAGATTCATGCTG 780
355-8_c11 TTTCTTTCAAAAATTACTTTTAGGTCATCATTCTCAATCATCCAGGTGAGATTCATGCTG 780
355-8_c13 TTTCTTTCAAAAATTACTTTTAGGTCATCATTCTCAATCATCCAGGTGAGATTCATGCTG 780
355-8_c14 TTTCTTTCAAAAATTACTTTTAGGTCATCATTCTCAATCATCCAGGTGAGATTCATGCTG 780

                                800                               820                               840
expected_sequence_EF1a-SF-P2A-tdTom GTTACCAACCTGTTTTGGATTGCCACAC TGCTCACGTTGCCTGCAAATTTACAGAATTTAA 840
350-10_c2 GTTACCAACCTGTTTTGGATTGCCACAC TGCTCACGTTGCCTGCAAATTTACAGAATTTAA 840
350-10_c3 GTTACCAACCTGTTTTGGATTGCCACAC TGCTCACGTTGCCTGCAAATTTACAGAATTTAA 840
350-10_c5 GTTACCAACCTGTTTTGGATTGCCACAC TGCTCACGTTGCCTGCAAATTTACAGAATTTAA 840
355-8_c11 GTTACCAACCTGTTTTGGATTGCCACAC TGCTCACGTTGCCTGCAAATTTACAGAATTTAA 840
355-8_c13 GTTACCAACCTGTTTTGGATTGCCACAC TGCTCACGTTGCCTGCAAATTTACAGAATTTAA 840
355-8_c14 GTTACCAACCTGTTTTGGATTGCCACAC TGCTCACGTTGCCTGCAAATTTACAGAATTTAA 840

                                860                               880                               900
expected_sequence_EF1a-SF-P2A-tdTom AGCAGAAATGTGATAGACGAAGTGGTAAAGTTTTAGAAGAAAATCCCAAAATGGTTAAAT 900
350-10_c2 AGCAGAAATGTGATAGACGAAGTGGTAAAGTTTTAGAAGAAAATCCCAAAATGGTTAAAT 900
350-10_c3 AGCAGAAATGTGATAGACGAAGTGGTAAAGTTTTAGAAGAAAATCCCAAAATGGTTAAAT 900
350-10_c5 AGCAGAAATGTGATAGACGAAGTGGTAAAGTTTTAGAAGAAAATCCCAAAATGGTTAAAT 900
355-8_c11 AGCAGAAATGTGATAGACGAAGTGGTAAAGTTTTAGAAGAAAATCCCAAAATGGTTAAAT 900
355-8_c13 AGCAGAAATGTGATAGACGAAGTGGTAAAGTTTTAGAAGAAAATCCCAAAATGGTTAAAT 900
355-8_c14 AGCAGAAATGTGATAGACGAAGTGGTAAAGTTTTAGAAGAAAATCCCAAAATGGTTAAAT 900

```

|                                     |                                                                 |       |  |       |  |       |      |
|-------------------------------------|-----------------------------------------------------------------|-------|--|-------|--|-------|------|
|                                     |                                                                 | 920   |  | 940   |  | 960   |      |
| expected_sequence_EF1a-SF-P2A-tdTom | CTGGTGATGCTGCTATGGTTACTTTGACTCCTTCTAAGCCATATGTGTGTTGAAGCTTTCT   |       |  |       |  |       | 960  |
| 350-10_c2                           | CTGGTGATGCTGCTATGGTTACTTTGACTCCTTCTAAGCCATATGTGTGTTGAAGCTTTCT   |       |  |       |  |       | 960  |
| 350-10_c3                           | CTGGTGATGCTGCTATGGTTACTTTGACTCCTTCTAAGCCATATGTGTGTTGAAGCTTTCT   |       |  |       |  |       | 960  |
| 350-10_c5                           | CTGGTGATGCTGCTATGGTTACTTTGACTCCTTCTAAGCCATATGTGTGTTGAAGCTTTCT   |       |  |       |  |       | 960  |
| 355-8_c11                           | CTGGTGATGCTGCTATGGTTACTTTGACTCCTTCTAAGCCATATGTGTGTTGAAGCTTTCT   |       |  |       |  |       | 960  |
| 355-8_c13                           | CTGGTGATGCTGCTATGGTTACTTTGACTCCTTCTAAGCCATATGTGTGTTGAAGCTTTCT   |       |  |       |  |       | 960  |
| 355-8_c14                           | CTGGTGATGCTGCTATGGTTACTTTGACTCCTTCTAAGCCATATGTGTGTTGAAGCTTTCT   |       |  |       |  |       | 960  |
|                                     |                                                                 | 980   |  | 1,000 |  | 1,020 |      |
| expected_sequence_EF1a-SF-P2A-tdTom | CTGACTACCAGCCATTGGGTCGTTTTGCTGTACGTGACATGAGACAAACTGTTGCTGTTG    |       |  |       |  |       | 1020 |
| 350-10_c2                           | CTGACTACCAGCCATTGGGTCGTTTTGCTGTACGTGACATGAGACAAACTGTTGCTGTTG    |       |  |       |  |       | 1020 |
| 350-10_c3                           | CTGACTACCAGCCATTGGGTCGTTTTGCTGTACGTGACATGAGACAAACTGTTGCTGTTG    |       |  |       |  |       | 1020 |
| 350-10_c5                           | CTGACTACCAGCCATTGGGTCGTTTTGCTGTACGTGACATGAGACAAACTGTTGCTGTTG    |       |  |       |  |       | 1020 |
| 355-8_c11                           | CTGACTACCAGCCATTGGGTCGTTTTGCTGTACGTGACATGAGACAAACTGTTGCTGTTG    |       |  |       |  |       | 1020 |
| 355-8_c13                           | CTGACTACCAGCCATTGGGTCGTTTTGCTGTACGTGACATGAGACAAACTGTTGCTGTTG    |       |  |       |  |       | 1020 |
| 355-8_c14                           | CTGACTACCAGCCATTGGGTCGTTTTGCTGTACGTGACATGAGACAAACTGTTGCTGTTG    |       |  |       |  |       | 1020 |
|                                     |                                                                 | 1,040 |  | 1,060 |  | 1,080 |      |
| expected_sequence_EF1a-SF-P2A-tdTom | GAGTTATCAAGAGTGTGAAAAGGCCGATGCTACTGGTAAAAATGACAAAATCAGCTCAA     |       |  |       |  |       | 1080 |
| 350-10_c2                           | GAGTTATCAAGAGTGTGAAAAGGCCGATGCTACTGGTAAAAATGACAAAATCAGCTCAA     |       |  |       |  |       | 1080 |
| 350-10_c3                           | GAGTTATCAAGAGTGTGAAAAGGCCGATGCTACTGGTAAAAATGACAAAATCAGCTCAA     |       |  |       |  |       | 1080 |
| 350-10_c5                           | GAGTTATCAAGAGTGTGAAAAGGCCGATGCTACTGGTAAAAATGACAAAATCAGCTCAA     |       |  |       |  |       | 1080 |
| 355-8_c11                           | GAGTTATCAAGAGTGTGAAAAGGCCGATGCTACTGGTAAAAATGACAAAATCAGCTCAA     |       |  |       |  |       | 1080 |
| 355-8_c13                           | GAGTTATCAAGAGTGTGAAAAGGCCGATGCTACTGGTAAAAATGACAAAATCAGCTCAA     |       |  |       |  |       | 1080 |
| 355-8_c14                           | GAGTTATCAAGAGTGTGAAAAGGCCGATGCTACTGGTAAAAATGACAAAATCAGCTCAA     |       |  |       |  |       | 1080 |
|                                     |                                                                 | 1,100 |  | 1,120 |  | 1,140 |      |
| expected_sequence_EF1a-SF-P2A-tdTom | AGGCTACCGGAAAGAAAAAATGGTCACATCCACAATTTGAAAAAGGTGGAGGTTCAGGAG    |       |  |       |  |       | 1140 |
| 350-10_c2                           | AGGCTACCGGAAAGAAAAAATGGTCACATCCACAATTTGAAAAAGGTGGAGGTTCAGGAG    |       |  |       |  |       | 1140 |
| 350-10_c3                           | AGGCTACCGGAAAGAAAAAATGGTCACATCCACAATTTGAAAAAGGTGGAGGTTCAGGAG    |       |  |       |  |       | 1140 |
| 350-10_c5                           | AGGCTACCGGAAAGAAAAAATGGTCACATCCACAATTTGAAAAAGGTGGAGGTTCAGGAG    |       |  |       |  |       | 1140 |
| 355-8_c11                           | AGGCTACCGGAAAGAAAAAATGGTCACATCCACAATTTGAAAAAGGTGGAGGTTCAGGAG    |       |  |       |  |       | 1140 |
| 355-8_c13                           | AGGCTACCGGAAAGAAAAAATGGTCACATCCACAATTTGAAAAAGGTGGAGGTTCAGGAG    |       |  |       |  |       | 1140 |
| 355-8_c14                           | AGGCTACCGGAAAGAAAAAATGGTCACATCCACAATTTGAAAAAGGTGGAGGTTCAGGAG    |       |  |       |  |       | 1140 |
|                                     |                                                                 | 1,160 |  | 1,180 |  | 1,200 |      |
| expected_sequence_EF1a-SF-P2A-tdTom | GTGGATCAGGTGGAGGTTTCATGGAGCCATCCACAATTTGAAAAAGGTGCTAGTGGAGAAG   |       |  |       |  |       | 1200 |
| 350-10_c2                           | GTGGATCAGGTGGAGGTTTCATGGAGCCATCCACAATTTGAAAAAGGTGCTAGTGGAGAAG   |       |  |       |  |       | 1200 |
| 350-10_c3                           | GTGGATCAGGTGGAGGTTTCATGGAGCCATCCACAATTTGAAAAAGGTGCTAGTGGAGAAG   |       |  |       |  |       | 1200 |
| 350-10_c5                           | GTGGATCAGGTGGAGGTTTCATGGAGCCATCCACAATTTGAAAAAGGTGCTAGTGGAGAAG   |       |  |       |  |       | 1200 |
| 355-8_c11                           | GTGGATCAGGTGGAGGTTTCATGGAGCCATCCACAATTTGAAAAAGGTGCTAGTGGAGAAG   |       |  |       |  |       | 1200 |
| 355-8_c13                           | GTGGATCAGGTGGAGGTTTCATGGAGCCATCCACAATTTGAAAAAGGTGCTAGTGGAGAAG   |       |  |       |  |       | 1200 |
| 355-8_c14                           | GTGGATCAGGTGGAGGTTTCATGGAGCCATCCACAATTTGAAAAAGGTGCTAGTGGAGAAG   |       |  |       |  |       | 1200 |
|                                     |                                                                 | 1,220 |  | 1,240 |  | 1,260 |      |
| expected_sequence_EF1a-SF-P2A-tdTom | ATTATAAAGATGATGATGATAAAGGTTTCAGGTGCTACAAATTTTTTCATTATTTAAAACAAG |       |  |       |  |       | 1260 |
| 350-10_c2                           | ATTATAAAGATGATGATGATAAAGGTTTCAGGTGCTACAAATTTTTTCATTATTTAAAACAAG |       |  |       |  |       | 1260 |
| 350-10_c3                           | ATTATAAAGATGATGATGATAAAGGTTTCAGGTGCTACAAATTTTTTCATTATTTAAAACAAG |       |  |       |  |       | 1260 |
| 350-10_c5                           | ATTATAAAGATGATGATGATAAAGGTTTCAGGTGCTACAAATTTTTTCATTATTTAAAACAAG |       |  |       |  |       | 1260 |
| 355-8_c11                           | ATTATAAAGATGATGATGATAAAGGTTTCAGGTGCTACAAATTTTTTCATTATTTAAAACAAG |       |  |       |  |       | 1260 |
| 355-8_c13                           | ATTATAAAGATGATGATGATAAAGGTTTCAGGTGCTACAAATTTTTTCATTATTTAAAACAAG |       |  |       |  |       | 1260 |
| 355-8_c14                           | ATTATAAAGATGATGATGATAAAGGTTTCAGGTGCTACAAATTTTTTCATTATTTAAAACAAG |       |  |       |  |       | 1260 |
|                                     |                                                                 | 1,280 |  | 1,300 |  | 1,320 |      |
| expected_sequence_EF1a-SF-P2A-tdTom | CTGGTGATGTTGAAGAAAAATCCAGGTCCAATGACTTCCAAAGGTGAAGAGGTTATCAAAG   |       |  |       |  |       | 1320 |
| 350-10_c2                           | CTGGTGATGTTGAAGAAAAATCCAGGTCCAATGACTTCCAAAGGTGAAGAGGTTATCAAAG   |       |  |       |  |       | 1320 |
| 350-10_c3                           | CTGGTGATGTTGAAGAAAAATCCAGGTCCAATGACTTCCAAAGGTGAAGAGGTTATCAAAG   |       |  |       |  |       | 1320 |
| 350-10_c5                           | CTGGTGATGTTGAAGAAAAATCCAGGTCCAATGACTTCCAAAGGTGAAGAGGTTATCAAAG   |       |  |       |  |       | 1320 |
| 355-8_c11                           | CTGGTGATGTTGAAGAAAAATCCAGGTCCAATGACTTCCAAAGGTGAAGAGGTTATCAAAG   |       |  |       |  |       | 1320 |
| 355-8_c13                           | CTGGTGATGTTGAAGAAAAATCCAGGTCCAATGACTTCCAAAGGTGAAGAGGTTATCAAAG   |       |  |       |  |       | 1320 |
| 355-8_c14                           | CTGGTGATGTTGAAGAAAAATCCAGGTCCAATGACTTCCAAAGGTGAAGAGGTTATCAAAG   |       |  |       |  |       | 1320 |
|                                     |                                                                 | 1,340 |  | 1,360 |  | 1,380 |      |
| expected_sequence_EF1a-SF-P2A-tdTom | AATTTATGCGTTTTCAAAGTTCGAATGGAAGGGAGTATGAATGGACATGAGTTTGAGATAG   |       |  |       |  |       | 1380 |
| 350-10_c2                           | AATTTATGCGTTTTCAAAGTTCGAATGGAAGGGAGTATGAATGGACATGAGTTTGAGATAG   |       |  |       |  |       | 1380 |
| 350-10_c3                           | AATTTATGCGTTTTCAAAGTTCGAATGGAAGGGAGTATGAATGGACATGAGTTTGAGATAG   |       |  |       |  |       | 1380 |
| 350-10_c5                           | AATTTATGCGTTTTCAAAGTTCGAATGGAAGGGAGTATGAATGGACATGAGTTTGAGATAG   |       |  |       |  |       | 1380 |
| 355-8_c11                           | AATTTATGCGTTTTCAAAGTTCGAATGGAAGGGAGTATGAATGGACATGAGTTTGAGATAG   |       |  |       |  |       | 1380 |
| 355-8_c13                           | AATTTATGCGTTTTCAAAGTTCGAATGGAAGGGAGTATGAATGGACATGAGTTTGAGATAG   |       |  |       |  |       | 1380 |
| 355-8_c14                           | AATTTATGCGTTTTCAAAGTTCGAATGGAAGGGAGTATGAATGGACATGAGTTTGAGATAG   |       |  |       |  |       | 1380 |

```

                                1,400                1,420                1,440
expected_sequence_EF1a-SF-P2A-tdTom AAGGAGAAGGGGAAGGTAGACCCATGAAGGCAC TCAAACGGCTAAGTTAAAAGTTACAA 1440
350-10_c2 AAGGAGAAGGGGAAGGTAGACCCATGAAGGCAC TCAAACGGCTAAGTTAAAAGTTACAA 1440
350-10_c3 AAGGAGAAGGGGAAGGTAGACCCATGAAGGCAC TCAAACGGCTAAGTTAAAAGTTACAA 1440
350-10_c5 AAGGAGAAGGGGAAGGTAGACCCATGAAGGCAC TCAAACGGCTAAGTTAAAAGTTACAA 1440
355-8_c11 AAGGAGAAGGGGAAGGTAGACCCATGAAGGCAC TCAAACGGCTAAGTTAAAAGTTACAA 1440
355-8_c13 AAGGAGAAGGGGAAGGTAGACCCATGAAGGCAC TCAAACGGCTAAGTTAAAAGTTACAA 1440
355-8_c14 AAGGAGAAGGGGAAGGTAGACCCATGAAGGCAC TCAAACGGCTAAGTTAAAAGTTACAA 1440

                                1,460                1,480                1,500
expected_sequence_EF1a-SF-P2A-tdTom AGGGAGGTCCACTGCCATTTGCTTGGGATATTTGTCTCC TCAATTCATGTATGGTTTCCA 1500
350-10_c2 AGGGAGGTCCACTGCCATTTGCTTGGGATATTTGTCTCC TCAATTCATGTATGGTTTCCA 1500
350-10_c3 AGGGAGGTCCACTGCCATTTGCTTGGGATATTTGTCTCC TCAATTCATGTATGGTTTCCA 1500
350-10_c5 AGGGAGGTCCACTGCCATTTGCTTGGGATATTTGTCTCC TCAATTCATGTATGGTTTCCA 1500
355-8_c11 AGGGAGGTCCACTGCCATTTGCTTGGGATATTTGTCTCC TCAATTCATGTATGGTTTCCA 1500
355-8_c13 AGGGAGGTCCACTGCCATTTGCTTGGGATATTTGTCTCC TCAATTCATGTATGGTTTCCA 1500
355-8_c14 AGGGAGGTCCACTGCCATTTGCTTGGGATATTTGTCTCC TCAATTCATGTATGGTTTCCA 1500

                                1,520                1,540                1,560
expected_sequence_EF1a-SF-P2A-tdTom AAGCATACGTTAAACACCCTGCAGATATTCGGGACTATAAGAAGTTATCGTTTCCAGAAG 1560
350-10_c2 AAGCATACGTTAAACACCCTGCAGATATTCGGGACTATAAGAAGTTATCGTTTCCAGAAG 1560
350-10_c3 AAGCATACGTTAAACACCCTGCAGATATTCGGGACTATAAGAAGTTATCGTTTCCAGAAG 1560
350-10_c5 AAGCATACGTTAAACACCCTGCAGATATTCGGGACTATAAGAAGTTATCGTTTCCAGAAG 1560
355-8_c11 AAGCATACGTTAAACACCCTGCAGATATTCGGGACTATAAGAAGTTATCGTTTCCAGAAG 1560
355-8_c13 AAGCATACGTTAAACACCCTGCAGATATTCGGGACTATAAGAAGTTATCGTTTCCAGAAG 1560
355-8_c14 AAGCATACGTTAAACACCCTGCAGATATTCGGGACTATAAGAAGTTATCGTTTCCAGAAG 1560

                                1,580                1,600                1,620
expected_sequence_EF1a-SF-P2A-tdTom GTTTTAAATGGGAACGCGTTATGAACCTCGAAGATGGTGGGTTAGTAACAGTAACACAGG 1620
350-10_c2 GTTTTAAATGGGAACGCGTTATGAACCTCGAAGATGGTGGGTTAGTAACAGTAACACAGG 1620
350-10_c3 GTTTTAAATGGGAACGCGTTATGAACCTCGAAGATGGTGGGTTAGTAACAGTAACACAGG 1620
350-10_c5 GTTTTAAATGGGAACGCGTTATGAACCTCGAAGATGGTGGGTTAGTAACAGTAACACAGG 1620
355-8_c11 GTTTTAAATGGGAACGCGTTATGAACCTCGAAGATGGTGGGTTAGTAACAGTAACACAGG 1620
355-8_c13 GTTTTAAATGGGAACGCGTTATGAACCTCGAAGATGGTGGGTTAGTAACAGTAACACAGG 1620
355-8_c14 GTTTTAAATGGGAACGCGTTATGAACCTCGAAGATGGTGGGTTAGTAACAGTAACACAGG 1620

                                1,640                1,660                1,680
expected_sequence_EF1a-SF-P2A-tdTom ATAGCAGCTTGCAAGATGGTACGTTAATCTACAAAGTGAAAATGAGAGGCACCAATTTTC 1680
350-10_c2 ATAGCAGCTTGCAAGATGGTACGTTAATCTACAAAGTGAAAATGAGAGGCACCAATTTTC 1680
350-10_c3 ATAGCAGCTTGCAAGATGGTACGTTAATCTACAAAGTGAAAATGAGAGGCACCAATTTTC 1680
350-10_c5 ATAGCAGCTTGCAAGATGGTACGTTAATCTACAAAGTGAAAATGAGAGGCACCAATTTTC 1680
355-8_c11 ATAGCAGCTTGCAAGATGGTACGTTAATCTACAAAGTGAAAATGAGAGGCACCAATTTTC 1680
355-8_c13 ATAGCAGCTTGCAAGATGGTACGTTAATCTACAAAGTGAAAATGAGAGGCACCAATTTTC 1680
355-8_c14 ATAGCAGCTTGCAAGATGGTACGTTAATCTACAAAGTGAAAATGAGAGGCACCAATTTTC 1680

                                1,700                1,720                1,740
expected_sequence_EF1a-SF-P2A-tdTom CACCAGATGGACCAGTCATGCAGAAGAAAAC TATGGGCTGGGAAGCAAGCACCGAAAGGC 1740
350-10_c2 CACCAGATGGACCAGTCATGCAGAAGAAAAC TATGGGCTGGGAAGCAAGCACCGAAAGGC 1740
350-10_c3 CACCAGATGGACCAGTCATGCAGAAGAAAAC TATGGGCTGGGAAGCAAGCACCGAAAGGC 1740
350-10_c5 CACCAGATGGACCAGTCATGCAGAAGAAAAC TATGGGCTGGGAAGCAAGCACCGAAAGGC 1740
355-8_c11 CACCAGATGGACCAGTCATGCAGAAGAAAAC TATGGGCTGGGAAGCAAGCACCGAAAGGC 1740
355-8_c13 CACCAGATGGACCAGTCATGCAGAAGAAAAC TATGGGCTGGGAAGCAAGCACCGAAAGGC 1740
355-8_c14 CACCAGATGGACCAGTCATGCAGAAGAAAAC TATGGGCTGGGAAGCAAGCACCGAAAGGC 1740

                                1,760                1,780                1,800
expected_sequence_EF1a-SF-P2A-tdTom TATATCCTAGGGATGGTGTGTTTTAAAAGGAGAGATCCATCAAGCTTTGAAACTAAAAGACG 1800
350-10_c2 TATATCCTAGGGATGGTGTGTTTTAAAAGGAGAGATCCATCAAGCTTTGAAACTAAAAGACG 1800
350-10_c3 TATATCCTAGGGATGGTGTGTTTTAAAAGGAGAGATCCATCAAGCTTTGAAACTAAAAGACG 1800
350-10_c5 TATATCCTAGGGATGGTGTGTTTTAAAAGGAGAGATCCATCAAGCTTTGAAACTAAAAGACG 1800
355-8_c11 TATATCCTAGGGATGGTGTGTTTTAAAAGGAGAGATCCATCAAGCTTTGAAACTAAAAGACG 1800
355-8_c13 TATATCCTAGGGATGGTGTGTTTTAAAAGGAGAGATCCATCAAGCTTTGAAACTAAAAGACG 1800
355-8_c14 TATATCCTAGGGATGGTGTGTTTTAAAAGGAGAGATCCATCAAGCTTTGAAACTAAAAGACG 1800

                                1,820                1,840                1,860
expected_sequence_EF1a-SF-P2A-tdTom GTGGCCACTATTTGGTGGAAATTTAAGACCATATACATGGCTAAGAAACCGGTACAGTTAC 1860
350-10_c2 GTGGCCACTATTTGGTGGAAATTTAAGACCATATACATGGCTAAGAAACCGGTACAGTTAC 1860
350-10_c3 GTGGCCACTATTTGGTGGAAATTTAAGACCATATACATGGCTAAGAAACCGGTACAGTTAC 1860
350-10_c5 GTGGCCACTATTTGGTGGAAATTTAAGACCATATACATGGCTAAGAAACCGGTACAGTTAC 1860
355-8_c11 GTGGCCACTATTTGGTGGAAATTTAAGACCATATACATGGCTAAGAAACCGGTACAGTTAC 1860
355-8_c13 GTGGCCACTATTTGGTGGAAATTTAAGACCATATACATGGCTAAGAAACCGGTACAGTTAC 1860
355-8_c14 GTGGCCACTATTTGGTGGAAATTTAAGACCATATACATGGCTAAGAAACCGGTACAGTTAC 1860

```

```

                                1,880                1,900                1,920
expected_sequence_EF1a-SF-P2A-tdTom CGGGATATTATTACGTGGATACTAAGCTAGATATAACATCTCACAAACGAGGACTACACAA 1920
350-10_c2 CGGGATATTATTACGTGGATACTAAGCTAGATATAACATCTCACAAACGAGGACTACACAA 1920
350-10_c3 CGGGATATTATTACGTGGATACTAAGCTAGATATAACATCTCACAAACGAGGACTACACAA 1920
350-10_c5 CGGGATATTATTACGTGGATACTAAGCTAGATATAACATCTCACAAACGAGGACTACACAA 1920
355-8_c11 CGGGATATTATTACGTGGATACTAAGCTAGATATAACATCTCACAAACGAGGACTACACAA 1920
355-8_c13 CGGGATATTATTACGTGGATACTAAGCTAGATATAACATCTCACAAACGAGGACTACACAA 1920
355-8_c14 CGGGATATTATTACGTGGATACTAAGCTAGATATAACATCTCACAAACGAGGACTACACAA 1920

                                1,940                1,960                1,980
expected_sequence_EF1a-SF-P2A-tdTom TTGTGGAACAATATGAAAGATCAGAAGGCCGTCATCATTGTTTCTTGGCCATGGCACTG 1980
350-10_c2 TTGTGGAACAATATGAAAGATCAGAAGGCCGTCATCATTGTTTCTTGGCCATGGCACTG 1980
350-10_c3 TTGTGGAACAATATGAAAGATCAGAAGGCCGTCATCATTGTTTCTTGGCCATGGCACTG 1980
350-10_c5 TTGTGGAACAATATGAAAGATCAGAAGGCCGTCATCATTGTTTCTTGGCCATGGCACTG 1980
355-8_c11 TTGTGGAACAATATGAAAGATCAGAAGGCCGTCATCATTGTTTCTTGGCCATGGCACTG 1980
355-8_c13 TTGTGGAACAATATGAAAGATCAGAAGGCCGTCATCATTGTTTCTTGGCCATGGCACTG 1980
355-8_c14 TTGTGGAACAATATGAAAGATCAGAAGGCCGTCATCATTGTTTCTTGGCCATGGCACTG 1980

                                2,000                2,020                2,040
expected_sequence_EF1a-SF-P2A-tdTom GTTCCACCGGTAGTGGATCATCAGGTACTGCTTCAAGTGAGGACAACAACATGGCGGTGA 2040
350-10_c2 GTTCCACCGGTAGTGGATCATCAGGTACTGCTTCAAGTGAGGACAACAACATGGCGGTGA 2040
350-10_c3 GTTCCACCGGTAGTGGATCATCAGGTACTGCTTCAAGTGAGGACAACAACATGGCGGTGA 2040
350-10_c5 GTTCCACCGGTAGTGGATCATCAGGTACTGCTTCAAGTGAGGACAACAACATGGCGGTGA 2040
355-8_c11 GTTCCACCGGTAGTGGATCATCAGGTACTGCTTCAAGTGAGGACAACAACATGGCGGTGA 2040
355-8_c13 GTTCCACCGGTAGTGGATCATCAGGTACTGCTTCAAGTGAGGACAACAACATGGCGGTGA 2040
355-8_c14 GTTCCACCGGTAGTGGATCATCAGGTACTGCTTCAAGTGAGGACAACAACATGGCGGTGA 2040

                                2,060                2,080                2,100
expected_sequence_EF1a-SF-P2A-tdTom TAAAAGAGTTCATGAGATTTAAAGTGCGAATGGAGGGCTCAATGAATGGACACGAATTTG 2100
350-10_c2 TAAAAGAGTTCATGAGATTTAAAGTGCGAATGGAGGGCTCAATGAATGGACACGAATTTG 2100
350-10_c3 TAAAAGAGTTCATGAGATTTAAAGTGCGAATGGAGGGCTCAATGAATGGACACGAATTTG 2100
350-10_c5 TAAAAGAGTTCATGAGATTTAAAGTGCGAATGGAGGGCTCAATGAATGGACACGAATTTG 2100
355-8_c11 TAAAAGAGTTCATGAGATTTAAAGTGCGAATGGAGGGCTCAATGAATGGACACGAATTTG 2100
355-8_c13 TAAAAGAGTTCATGAGATTTAAAGTGCGAATGGAGGGCTCAATGAATGGACACGAATTTG 2100
355-8_c14 TAAAAGAGTTCATGAGATTTAAAGTGCGAATGGAGGGCTCAATGAATGGACACGAATTTG 2100

                                2,120                2,140                2,160
expected_sequence_EF1a-SF-P2A-tdTom AAATTGAAGGGGAGGGTGAAGGACGACCGTACGAAGGAACACAAACAGCCAAATTGAAAG 2160
350-10_c2 AAATTGAAGGGGAGGGTGAAGGACGACCGTACGAAGGAACACAAACAGCCAAATTGAAAG 2160
350-10_c3 AAATTGAAGGGGAGGGTGAAGGACGACCGTACGAAGGAACACAAACAGCCAAATTGAAAG 2160
350-10_c5 AAATTGAAGGGGAGGGTGAAGGACGACCGTACGAAGGAACACAAACAGCCAAATTGAAAG 2160
355-8_c11 AAATTGAAGGGGAGGGTGAAGGACGACCGTACGAAGGAACACAAACAGCCAAATTGAAAG 2160
355-8_c13 AAATTGAAGGGGAGGGTGAAGGACGACCGTACGAAGGAACACAAACAGCCAAATTGAAAG 2160
355-8_c14 AAATTGAAGGGGAGGGTGAAGGACGACCGTACGAAGGAACACAAACAGCCAAATTGAAAG 2160

                                2,180                2,200                2,220
expected_sequence_EF1a-SF-P2A-tdTom TAAC TAAGGGAGGTCCCTTCC TTTTGCATGGGACATCTTATCTCCACAATTTATGTACG 2220
350-10_c2 TAAC TAAGGGAGGTCCCTTCC TTTTGCATGGGACATCTTATCTCCACAATTTATGTACG 2220
350-10_c3 TAAC TAAGGGAGGTCCCTTCC TTTTGCATGGGACATCTTATCTCCACAATTTATGTACG 2220
350-10_c5 TAAC TAAGGGAGGTCCCTTCC TTTTGCATGGGACATCTTATCTCCACAATTTATGTACG 2220
355-8_c11 TAAC TAAGGGAGGTCCCTTCC TTTTGCATGGGACATCTTATCTCCACAATTTATGTACG 2220
355-8_c13 TAAC TAAGGGAGGTCCCTTCC TTTTGCATGGGACATCTTATCTCCACAATTTATGTACG 2220
355-8_c14 TAAC TAAGGGAGGTCCCTTCC TTTTGCATGGGACATCTTATCTCCACAATTTATGTACG 2220

                                2,240                2,260                2,280
expected_sequence_EF1a-SF-P2A-tdTom GATCTAAAGCCTATGTCAAACATCCAGCTGATATTCCCGATTACAAGAACTTAGCTTTT 2280
350-10_c2 GATCTAAAGCCTATGTCAAACATCCAGCTGATATTCCCGATTACAAGAACTTAGCTTTT 2280
350-10_c3 GATCTAAAGCCTATGTCAAACATCCAGCTGATATTCCCGATTACAAGAACTTAGCTTTT 2280
350-10_c5 GATCTAAAGCCTATGTCAAACATCCAGCTGATATTCCCGATTACAAGAACTTAGCTTTT 2280
355-8_c11 GATCTAAAGCCTATGTCAAACATCCAGCTGATATTCCCGATTACAAGAACTTAGCTTTT 2280
355-8_c13 GATCTAAAGCCTATGTCAAACATCCAGCTGATATTCCCGATTACAAGAACTTAGCTTTT 2280
355-8_c14 GATCTAAAGCCTATGTCAAACATCCAGCTGATATTCCCGATTACAAGAACTTAGCTTTT 2280

                                2,300                2,320                2,340
expected_sequence_EF1a-SF-P2A-tdTom CAGAGGGATTCAAATGGGAACGTGTGATGAATTTCGAAGATGGAGGTTTAGTTACAGTAA 2340
350-10_c2 CAGAGGGATTCAAATGGGAACGTGTGATGAATTTCGAAGATGGAGGTTTAGTTACAGTAA 2340
350-10_c3 CAGAGGGATTCAAATGGGAACGTGTGATGAATTTCGAAGATGGAGGTTTAGTTACAGTAA 2340
350-10_c5 CAGAGGGATTCAAATGGGAACGTGTGATGAATTTCGAAGATGGAGGTTTAGTTACAGTAA 2340
355-8_c11 CAGAGGGATTCAAATGGGAACGTGTGATGAATTTCGAAGATGGAGGTTTAGTTACAGTAA 2340
355-8_c13 CAGAGGGATTCAAATGGGAACGTGTGATGAATTTCGAAGATGGAGGTTTAGTTACAGTAA 2340
355-8_c14 CAGAGGGATTCAAATGGGAACGTGTGATGAATTTCGAAGATGGAGGTTTAGTTACAGTAA 2340

```

|                                     |                               |                    |                 |       |  |       |  |
|-------------------------------------|-------------------------------|--------------------|-----------------|-------|--|-------|--|
|                                     |                               | 2,360              |                 | 2,380 |  | 2,400 |  |
| expected_sequence_EF1a-SF-P2A-tdTom | CCCCAAGACAGTTCTTTACAAGATGGAAC | TTTGATCTATAAAGTCAA | AAATGAGAGGAACAA | 2400  |  |       |  |
| 350-10_c2                           | CCCCAAGACAGTTCTTTACAAGATGGAAC | TTTGATCTATAAAGTCAA | AAATGAGAGGAACAA | 2400  |  |       |  |
| 350-10_c3                           | CCCCAAGACAGTTCTTTACAAGATGGAAC | TTTGATCTATAAAGTCAA | AAATGAGAGGAACAA | 2400  |  |       |  |
| 350-10_c5                           | CCCCAAGACAGTTCTTTACAAGATGGAAC | TTTGATCTATAAAGTCAA | AAATGAGAGGAACAA | 2400  |  |       |  |
| 355-8_c11                           | CCCCAAGACAGTTCTTTACAAGATGGAAC | TTTGATCTATAAAGTCAA | AAATGAGAGGAACAA | 2400  |  |       |  |
| 355-8_c13                           | CCCCAAGACAGTTCTTTACAAGATGGAAC | TTTGATCTATAAAGTCAA | AAATGAGAGGAACAA | 2400  |  |       |  |
| 355-8_c14                           | CCCCAAGACAGTTCTTTACAAGATGGAAC | TTTGATCTATAAAGTCAA | AAATGAGAGGAACAA | 2400  |  |       |  |

  

|                                     |                              |          |                     |       |  |       |  |
|-------------------------------------|------------------------------|----------|---------------------|-------|--|-------|--|
|                                     |                              | 2,420    |                     | 2,440 |  | Pr899 |  |
| expected_sequence_EF1a-SF-P2A-tdTom | ATTTCCACCAGATGGGCCTGTTATGCAA | AAGAAAAC | GATGGGTGGGAGGCATCAA | 2457  |  |       |  |
| 350-10_c2                           | ATTTCCACCAGATGGGCCTGTTATGCAA | AAGAAAAC | GATGGGTGGGAGGCATCAA | 2457  |  |       |  |
| 350-10_c3                           | ATTTCCACCAGATGGGCCTGTTATGCAA | AAGAAAAC | GATGGGTGGGAGGCATCAA | 2457  |  |       |  |
| 350-10_c5                           | ATTTCCACCAGATGGGCCTGTTATGCAA | AAGAAAAC | GATGGGTGGGAGGCATCAA | 2457  |  |       |  |
| 355-8_c11                           | ATTTCCACCAGATGGGCCTGTTATGCAA | AAGAAAAC | GATGGGTGGGAGGCATCAA | 2457  |  |       |  |
| 355-8_c13                           | ATTTCCACCAGATGGGCCTGTTATGCAA | AAGAAAAC | GATGGGTGGGAGGCATCAA | 2457  |  |       |  |
| 355-8_c14                           | ATTTCCACCAGATGGGCCTGTTATGCAA | AAGAAAAC | GATGGGTGGGAGGCATCAA | 2457  |  |       |  |

**Fig S6. Alignment of upstream and downstream integration sites from *Eef1a*<sup>SF-P2A-tdTom</sup> colonies.**

Nucleotide alignment of the region encoding the upstream integration site from the founder colony, 350-10, and one transgenic offspring, 355-8. Three cloned amplicons were sequenced for each animal at each site. Primer binding sites are indicated in green on the expected sequence.
